# Supplementary material for: The role of solvation in proton transfer reactions: implications for predicting salt/co-crystal formation using the ΔpKa rule
Source: Royal Society of Chemistry journal article supplement (doi:10.1039/d1fd00081k), 2022-01-01
Supplement: d1fd00081k1.xlsx [file d1fd00081k1.xlsx]

## Sheet: Dataset-1
ID	Total-C	MC	Zwit	Q4	Water	Nsolvents	CrystalType	Htransfer	CrystalTypeS	Deltapka1	Deltapka1-Tag	Deltapka2	Deltapka2-Tag
GEFMUZ	1	1	noZ	noQ4	noWater	0	Neutral	0	1-Neutral	-29.57	Self-delta-pka	Nan	Nan
ILEXEC	1	1	noZ	noQ4	noWater	0	Neutral	0	1-Neutral	-29.42	Self-delta-pka	Nan	Nan
BEGWUH	1	1	noZ	noQ4	noWater	0	Neutral	0	1-Neutral	-28.61	Self-delta-pka	Nan	Nan
KEVJAX	1	1	noZ	noQ4	noWater	0	Neutral	0	1-Neutral	-28.6	Self-delta-pka	Nan	Nan
POCWOT	1	1	noZ	noQ4	noWater	0	Neutral	0	1-Neutral	-28.55	Self-delta-pka	Nan	Nan
DEWDUH	1	1	noZ	noQ4	noWater	0	Neutral	0	1-Neutral	-28.48	Self-delta-pka	Nan	Nan
SAZMOY	1	1	noZ	noQ4	noWater	0	Neutral	0	1-Neutral	-28.44	Self-delta-pka	Nan	Nan
DUKLAW	1	1	noZ	noQ4	noWater	0	Neutral	0	1-Neutral	-28.44	Self-delta-pka	-29.72	Self-delta-pka
OCTTLS	1	1	noZ	noQ4	noWater	0	Neutral	0	1-Neutral	-28.44	Self-delta-pka	-29.72	Self-delta-pka
TUYKAZ	1	1	noZ	noQ4	noWater	0	Neutral	0	1-Neutral	-28.39	Self-delta-pka	Nan	Nan
FACZEO	1	1	noZ	noQ4	noWater	0	Neutral	0	1-Neutral	-28.37	Self-delta-pka	Nan	Nan
CAMPQU	1	1	noZ	noQ4	noWater	0	Neutral	0	1-Neutral	-28.33	Self-delta-pka	Nan	Nan
MAPYNM	2	1	Zwit	Q4	Water	0	Neutral	0	1-NZQ4__Hydrate	-28.32	Self-delta-pka	Nan	Nan
CAMPLO10	1	1	noZ	noQ4	noWater	0	Neutral	0	1-Neutral	-28.3	Self-delta-pka	Nan	Nan
YOBCOK	1	1	noZ	noQ4	noWater	0	Neutral	0	1-Neutral	-28.29	Self-delta-pka	Nan	Nan
AVAFIO	1	1	noZ	noQ4	noWater	0	Neutral	0	1-Neutral	-28.25	Self-delta-pka	Nan	Nan
DESVUV	1	1	noZ	noQ4	noWater	0	Neutral	0	1-Neutral	-28.17	Self-delta-pka	Nan	Nan
GEQKOD	1	1	noZ	noQ4	noWater	0	Neutral	0	1-Neutral	-28.16	Self-delta-pka	Nan	Nan
SIPTIV	2	1	noZ	noQ4	noWater	1	Neutral	0	1-N_1-Solvate_	-28.11	Self-delta-pka	Nan	Nan
CIQQEA	1	1	noZ	noQ4	noWater	0	Neutral	0	1-Neutral	-28.1	Self-delta-pka	Nan	Nan
WOHFAA	1	1	noZ	noQ4	noWater	0	Neutral	0	1-Neutral	-28.04	Self-delta-pka	Nan	Nan
BTCUNO10	1	1	noZ	noQ4	noWater	0	Neutral	0	1-Neutral	-28.03	Self-delta-pka	Nan	Nan
PAXKAB	1	1	noZ	noQ4	noWater	0	Neutral	0	1-Neutral	-28.02	Self-delta-pka	Nan	Nan
REMSAG	1	1	noZ	noQ4	noWater	0	Neutral	0	1-Neutral	-28	Self-delta-pka	Nan	Nan
WITJER	1	1	noZ	noQ4	noWater	0	Neutral	0	1-Neutral	-27.97	Self-delta-pka	Nan	Nan
ITINII	1	1	Zwit	Q4	noWater	0	Neutral	0	1-NeutralZQ4	-27.97	Self-delta-pka	-28.63	Self-delta-pka
DCPEDO	1	1	noZ	noQ4	noWater	0	Neutral	0	1-Neutral	-27.96	Self-delta-pka	Nan	Nan
XODBAU	1	1	Zwit	Q4	noWater	0	Neutral	0	1-NeutralZQ4	-27.95	Self-delta-pka	-28.62	Self-delta-pka
TCUNDO	1	1	noZ	noQ4	noWater	0	Neutral	0	1-Neutral	-27.92	Self-delta-pka	Nan	Nan
DIQCAK	1	1	noZ	noQ4	noWater	0	Neutral	0	1-Neutral	-27.89	Self-delta-pka	Nan	Nan
LICXUQ	1	1	noZ	noQ4	noWater	0	Neutral	0	1-Neutral	-27.89	Self-delta-pka	Nan	Nan
GUTGEH	1	1	noZ	noQ4	noWater	0	Neutral	0	1-Neutral	-27.87	Self-delta-pka	Nan	Nan
GUTGIL	1	1	noZ	noQ4	noWater	0	Neutral	0	1-Neutral	-27.87	Self-delta-pka	Nan	Nan
FEMLAL	2	1	noZ	noQ4	noWater	1	Neutral	0	1-N_1-Solvate_	-27.85	Self-delta-pka	Nan	Nan
RIZGAK	1	1	noZ	noQ4	noWater	0	Neutral	0	1-Neutral	-27.79	Self-delta-pka	Nan	Nan
HIBLEJ	1	1	noZ	noQ4	noWater	0	Neutral	0	1-Neutral	-27.75	Self-delta-pka	Nan	Nan
KEDCON	1	1	noZ	noQ4	noWater	0	Neutral	0	1-Neutral	-27.75	Self-delta-pka	Nan	Nan
YISQOJ	1	1	noZ	noQ4	noWater	0	Neutral	0	1-Neutral	-27.74	Self-delta-pka	Nan	Nan
HABZIT	1	1	noZ	noQ4	noWater	0	Neutral	0	1-Neutral	-27.74	Self-delta-pka	Nan	Nan
ECILEJ	1	1	noZ	noQ4	noWater	0	Neutral	0	1-Neutral	-27.73	Self-delta-pka	Nan	Nan
OMEPIG	1	1	noZ	noQ4	noWater	0	Neutral	0	1-Neutral	-27.72	Self-delta-pka	Nan	Nan
MUGKEG	1	1	noZ	noQ4	noWater	0	Neutral	0	1-Neutral	-27.71	Self-delta-pka	Nan	Nan
COJKES	1	1	noZ	noQ4	noWater	0	Neutral	0	1-Neutral	-27.69	Self-delta-pka	Nan	Nan
FOFNUL	1	1	noZ	noQ4	noWater	0	Neutral	0	1-Neutral	-27.69	Self-delta-pka	Nan	Nan
DUXNOZ02	1	1	noZ	noQ4	noWater	0	Neutral	0	1-Neutral	-27.68	Self-delta-pka	Nan	Nan
FERTUT	1	1	noZ	noQ4	noWater	0	Neutral	0	1-Neutral	-27.68	Self-delta-pka	Nan	Nan
CLBHXO	1	1	noZ	noQ4	noWater	0	Neutral	0	1-Neutral	-27.67	Self-delta-pka	Nan	Nan
GIJQIB	1	1	noZ	noQ4	noWater	0	Neutral	0	1-Neutral	-27.67	Self-delta-pka	Nan	Nan
FEQJUI	1	1	noZ	noQ4	noWater	0	Neutral	0	1-Neutral	-27.66	Self-delta-pka	Nan	Nan
SADNUK	2	1	noZ	noQ4	noWater	1	Neutral	0	1-N_1-Solvate_	-27.66	Self-delta-pka	Nan	Nan
FUHNAY	1	1	noZ	noQ4	noWater	0	Neutral	0	1-Neutral	-27.66	Self-delta-pka	Nan	Nan
JAQNEX	1	1	noZ	noQ4	noWater	0	Neutral	0	1-Neutral	-27.66	Self-delta-pka	Nan	Nan
BIPGOZ	1	1	noZ	noQ4	noWater	0	Neutral	0	1-Neutral	-27.65	Self-delta-pka	Nan	Nan
BIPQID	1	1	noZ	noQ4	noWater	0	Neutral	0	1-Neutral	-27.65	Self-delta-pka	Nan	Nan
CMCHXO	1	1	noZ	noQ4	noWater	0	Neutral	0	1-Neutral	-27.65	Self-delta-pka	Nan	Nan
JITJOO	1	1	Zwit	Q4	noWater	0	Neutral	0	1-NeutralZQ4	-27.63	Self-delta-pka	Nan	Nan
WOXLAW	1	1	noZ	noQ4	noWater	0	Neutral	0	1-Neutral	-27.61	Self-delta-pka	Nan	Nan
WOXLEA	1	1	noZ	noQ4	noWater	0	Neutral	0	1-Neutral	-27.61	Self-delta-pka	Nan	Nan
XIYYEJ	1	1	noZ	noQ4	noWater	0	Neutral	0	1-Neutral	-27.61	Self-delta-pka	Nan	Nan
ECAWAG	1	1	noZ	noQ4	noWater	0	Neutral	0	1-Neutral	-27.57	Self-delta-pka	Nan	Nan
NUBFOF	1	1	noZ	noQ4	noWater	0	Neutral	0	1-Neutral	-27.54	Self-delta-pka	Nan	Nan
HURVOH	2	2	noZ	noQ4	noWater	0	Neutral	0	2-N_	-27.52	Self-delta-pka	Nan	Nan
COXZIA	1	1	noZ	noQ4	noWater	0	Neutral	0	1-Neutral	-27.52	Self-delta-pka	Nan	Nan
TUTXUB	1	1	noZ	noQ4	noWater	0	Neutral	0	1-Neutral	-27.51	Self-delta-pka	Nan	Nan
TUTYAI	1	1	noZ	noQ4	noWater	0	Neutral	0	1-Neutral	-27.51	Self-delta-pka	Nan	Nan
JAJNUD	1	1	noZ	noQ4	noWater	0	Neutral	0	1-Neutral	-27.5	Self-delta-pka	Nan	Nan
JAJPAL	1	1	noZ	noQ4	noWater	0	Neutral	0	1-Neutral	-27.5	Self-delta-pka	Nan	Nan
LUSYUV	1	1	noZ	noQ4	noWater	0	Neutral	0	1-Neutral	-27.49	Self-delta-pka	Nan	Nan
WELTUC	1	1	noZ	noQ4	noWater	0	Neutral	0	1-Neutral	-27.49	Self-delta-pka	Nan	Nan
XEWGUC	1	1	noZ	noQ4	noWater	0	Neutral	0	1-Neutral	-27.48	Self-delta-pka	Nan	Nan
BEFNEF	1	1	noZ	noQ4	noWater	0	Neutral	0	1-Neutral	-27.47	Self-delta-pka	Nan	Nan
XOJBON	1	1	noZ	noQ4	noWater	0	Neutral	0	1-Neutral	-27.46	Self-delta-pka	-28.1	Self-delta-pka
TCMHXO	1	1	noZ	noQ4	noWater	0	Neutral	0	1-Neutral	-27.46	Self-delta-pka	Nan	Nan
TUTZIR	1	1	noZ	noQ4	noWater	0	Neutral	0	1-Neutral	-27.46	Self-delta-pka	Nan	Nan
CUWRIV	1	1	noZ	noQ4	noWater	0	Neutral	0	1-Neutral	-27.46	Self-delta-pka	Nan	Nan
TUTYOW	1	1	noZ	noQ4	noWater	0	Neutral	0	1-Neutral	-27.45	Self-delta-pka	Nan	Nan
LIHBOU	1	1	noZ	noQ4	noWater	0	Neutral	0	1-Neutral	-27.45	Self-delta-pka	Nan	Nan
COXBST	1	1	noZ	noQ4	noWater	0	Neutral	0	1-Neutral	-27.43	Self-delta-pka	Nan	Nan
ZOBTUF	1	1	noZ	noQ4	noWater	0	Neutral	0	1-Neutral	-27.43	Self-delta-pka	Nan	Nan
GODZOP	2	1	noZ	noQ4	noWater	1	Neutral	0	1-N_1-Solvate_	-27.43	Self-delta-pka	Nan	Nan
YUPPEE	1	1	noZ	noQ4	noWater	0	Neutral	0	1-Neutral	-27.42	Self-delta-pka	Nan	Nan
YUPPII	1	1	noZ	noQ4	noWater	0	Neutral	0	1-Neutral	-27.42	Self-delta-pka	Nan	Nan
VEMXIU	1	1	noZ	noQ4	noWater	0	Neutral	0	1-Neutral	-27.41	Self-delta-pka	Nan	Nan
VEMXOA	1	1	noZ	noQ4	noWater	0	Neutral	0	1-Neutral	-27.41	Self-delta-pka	Nan	Nan
COMDIR	1	1	noZ	noQ4	noWater	0	Neutral	0	1-Neutral	-27.4	Self-delta-pka	Nan	Nan
BIJROB	1	1	noZ	noQ4	noWater	0	Neutral	0	1-Neutral	-27.4	Self-delta-pka	Nan	Nan
CUVRAN	1	1	noZ	noQ4	noWater	0	Neutral	0	1-Neutral	-27.4	Self-delta-pka	Nan	Nan
CLBUST	1	1	noZ	noQ4	noWater	0	Neutral	0	1-Neutral	-27.39	Self-delta-pka	Nan	Nan
REHKAQ	1	1	noZ	noQ4	noWater	0	Neutral	0	1-Neutral	-27.39	Self-delta-pka	Nan	Nan
TEQZOE	1	1	noZ	noQ4	noWater	0	Neutral	0	1-Neutral	-27.39	Self-delta-pka	Nan	Nan
VISFOT	1	1	noZ	noQ4	noWater	0	Neutral	0	1-Neutral	-27.39	Self-delta-pka	Nan	Nan
JOTDIF	1	1	noZ	noQ4	noWater	0	Neutral	0	1-Neutral	-27.38	Self-delta-pka	Nan	Nan
HABZIW	1	1	noZ	noQ4	noWater	0	Neutral	0	1-Neutral	-27.38	Self-delta-pka	Nan	Nan
OHAWOJ	1	1	noZ	noQ4	noWater	0	Neutral	0	1-Neutral	-27.37	Self-delta-pka	Nan	Nan
BOYDAV03	1	1	noZ	noQ4	noWater	0	Neutral	0	1-Neutral	-27.36	Self-delta-pka	Nan	Nan
EZAMUO	1	1	noZ	noQ4	noWater	0	Neutral	0	1-Neutral	-27.36	Self-delta-pka	Nan	Nan
IMUKIL	1	1	noZ	noQ4	noWater	0	Neutral	0	1-Neutral	-27.36	Self-delta-pka	Nan	Nan
XOGGAB	1	1	noZ	noQ4	noWater	0	Neutral	0	1-Neutral	-27.35	Self-delta-pka	Nan	Nan
FIQHAQ	1	1	noZ	noQ4	noWater	0	Neutral	0	1-Neutral	-27.35	Self-delta-pka	Nan	Nan
KOYREV	1	1	noZ	noQ4	noWater	0	Neutral	0	1-Neutral	-27.34	Self-delta-pka	Nan	Nan
KEMPOK	1	1	noZ	noQ4	noWater	0	Neutral	0	1-Neutral	-27.34	Self-delta-pka	Nan	Nan
VONHAH	1	1	noZ	noQ4	noWater	0	Neutral	0	1-Neutral	-27.34	Self-delta-pka	Nan	Nan
PANBUB	1	1	noZ	noQ4	noWater	0	Neutral	0	1-Neutral	-27.33	Self-delta-pka	Nan	Nan
NOSMIR	2	1	noZ	noQ4	noWater	1	Neutral	0	1-N_1-Solvate_	-27.32	Self-delta-pka	Nan	Nan
HEYYAL	1	1	noZ	noQ4	noWater	0	Neutral	0	1-Neutral	-27.31	Self-delta-pka	Nan	Nan
CIBFAW	1	1	Zwit	Q4	noWater	0	Neutral	0	1-NeutralZQ4	-27.31	Self-delta-pka	Nan	Nan
BRTCNO	1	1	noZ	noQ4	noWater	0	Neutral	0	1-Neutral	-27.29	Self-delta-pka	Nan	Nan
TIPMOW	1	1	noZ	noQ4	noWater	0	Neutral	0	1-Neutral	-27.28	Self-delta-pka	Nan	Nan
UCIYAJ	1	1	noZ	noQ4	noWater	0	Neutral	0	1-Neutral	-27.28	Self-delta-pka	Nan	Nan
TDBUDO	1	1	noZ	noQ4	noWater	0	Neutral	0	1-Neutral	-27.27	Self-delta-pka	Nan	Nan
LIWPAL	1	1	noZ	noQ4	noWater	0	Neutral	0	1-Neutral	-27.26	Self-delta-pka	Nan	Nan
YOFTEV	1	1	noZ	noQ4	noWater	0	Neutral	0	1-Neutral	-27.26	Self-delta-pka	Nan	Nan
CHTDMS10	1	1	noZ	noQ4	noWater	0	Neutral	0	1-Neutral	-27.25	Self-delta-pka	Nan	Nan
QIFVUY	1	1	noZ	noQ4	noWater	0	Neutral	0	1-Neutral	-27.24	Self-delta-pka	Nan	Nan
TBCYCX	1	1	noZ	noQ4	noWater	0	Neutral	0	1-Neutral	-27.24	Self-delta-pka	Nan	Nan
OWEKEH	1	1	noZ	noQ4	noWater	0	Neutral	0	1-Neutral	-27.23	Self-delta-pka	Nan	Nan
UVUYUG	1	1	noZ	noQ4	noWater	0	Neutral	0	1-Neutral	-27.23	Self-delta-pka	Nan	Nan
NEKNIA	1	1	noZ	noQ4	noWater	0	Neutral	0	1-Neutral	-27.23	Self-delta-pka	Nan	Nan
QOZHOE	1	1	noZ	noQ4	noWater	0	Neutral	0	1-Neutral	-27.22	Self-delta-pka	Nan	Nan
QAXYOE	1	1	noZ	noQ4	noWater	0	Neutral	0	1-Neutral	-27.21	Self-delta-pka	Nan	Nan
THPDEC10	1	1	noZ	noQ4	noWater	0	Neutral	0	1-Neutral	-27.21	Self-delta-pka	Nan	Nan
ZAJGAS	1	1	noZ	noQ4	noWater	0	Neutral	0	1-Neutral	-27.2	Self-delta-pka	Nan	Nan
BEYZUA	1	1	noZ	noQ4	noWater	0	Neutral	0	1-Neutral	-27.19	Self-delta-pka	Nan	Nan
HAWTAA	1	1	noZ	noQ4	noWater	0	Neutral	0	1-Neutral	-27.19	Self-delta-pka	Nan	Nan
JAPDAF	1	1	noZ	noQ4	noWater	0	Neutral	0	1-Neutral	-27.19	Self-delta-pka	Nan	Nan
XIJCIE	1	1	noZ	noQ4	noWater	0	Neutral	0	1-Neutral	-27.19	Self-delta-pka	Nan	Nan
BEBKEZ	1	1	noZ	noQ4	noWater	0	Neutral	0	1-Neutral	-27.19	Self-delta-pka	Nan	Nan
MATHAQ	1	1	noZ	noQ4	noWater	0	Neutral	0	1-Neutral	-27.19	Self-delta-pka	Nan	Nan
LEVYOB	1	1	noZ	noQ4	noWater	0	Neutral	0	1-Neutral	-27.17	Self-delta-pka	Nan	Nan
LEWWUG	1	1	noZ	noQ4	noWater	0	Neutral	0	1-Neutral	-27.17	Self-delta-pka	Nan	Nan
PONWUM	1	1	noZ	noQ4	noWater	0	Neutral	0	1-Neutral	-27.17	Self-delta-pka	Nan	Nan
SAPWAH	1	1	noZ	noQ4	noWater	0	Neutral	0	1-Neutral	-27.17	Self-delta-pka	Nan	Nan
CLHEPO10	1	1	noZ	noQ4	noWater	0	Neutral	0	1-Neutral	-27.16	Self-delta-pka	Nan	Nan
VEZDAG	1	1	noZ	noQ4	noWater	0	Neutral	0	1-Neutral	-27.16	Self-delta-pka	Nan	Nan
VOQRAU	1	1	noZ	noQ4	noWater	0	Neutral	0	1-Neutral	-27.16	Self-delta-pka	Nan	Nan
XUQRIL	1	1	noZ	noQ4	noWater	0	Neutral	0	1-Neutral	-27.16	Self-delta-pka	Nan	Nan
WESYAU	1	1	noZ	noQ4	noWater	0	Neutral	0	1-Neutral	-27.16	Self-delta-pka	Nan	Nan
CELRAM	1	1	noZ	noQ4	noWater	0	Neutral	0	1-Neutral	-27.15	Self-delta-pka	Nan	Nan
DINNIA	1	1	noZ	noQ4	noWater	0	Neutral	0	1-Neutral	-27.15	Self-delta-pka	Nan	Nan
TBTRCP10	1	1	noZ	noQ4	noWater	0	Neutral	0	1-Neutral	-27.15	Self-delta-pka	Nan	Nan
UWEQAP	1	1	noZ	noQ4	noWater	0	Neutral	0	1-Neutral	-27.15	Self-delta-pka	Nan	Nan
XEZGUE	1	1	noZ	noQ4	noWater	0	Neutral	0	1-Neutral	-27.15	Self-delta-pka	Nan	Nan
DUSDOL	1	1	noZ	noQ4	noWater	0	Neutral	0	1-Neutral	-27.14	Self-delta-pka	Nan	Nan
GERDEP	1	1	noZ	noQ4	noWater	0	Neutral	0	1-Neutral	-27.14	Self-delta-pka	Nan	Nan
LAWHEY	1	1	noZ	noQ4	noWater	0	Neutral	0	1-Neutral	-27.14	Self-delta-pka	Nan	Nan
TCCYHO	1	1	noZ	noQ4	noWater	0	Neutral	0	1-Neutral	-27.14	Self-delta-pka	Nan	Nan
ASEHEN	1	1	noZ	noQ4	noWater	0	Neutral	0	1-Neutral	-27.13	Self-delta-pka	Nan	Nan
BUFHUF	1	1	noZ	noQ4	noWater	0	Neutral	0	1-Neutral	-27.13	Self-delta-pka	Nan	Nan
CULBAM	1	1	noZ	noQ4	noWater	0	Neutral	0	1-Neutral	-27.13	Self-delta-pka	Nan	Nan
SEFKIA	1	1	noZ	noQ4	noWater	0	Neutral	0	1-Neutral	-27.12	Self-delta-pka	Nan	Nan
VIKYAP	1	1	noZ	noQ4	noWater	0	Neutral	0	1-Neutral	-27.12	Self-delta-pka	Nan	Nan
YONDUC	1	1	noZ	noQ4	noWater	0	Neutral	0	1-Neutral	-27.12	Self-delta-pka	Nan	Nan
GACFEW	1	1	noZ	noQ4	noWater	0	Neutral	0	1-Neutral	-27.12	Self-delta-pka	Nan	Nan
HOCJOA	1	1	noZ	noQ4	noWater	0	Neutral	0	1-Neutral	-27.12	Self-delta-pka	Nan	Nan
LAPHOZ	1	1	noZ	noQ4	noWater	0	Neutral	0	1-Neutral	-27.12	Self-delta-pka	Nan	Nan
LAPHUF	1	1	noZ	noQ4	noWater	0	Neutral	0	1-Neutral	-27.12	Self-delta-pka	Nan	Nan
PONXAT	1	1	noZ	noQ4	noWater	0	Neutral	0	1-Neutral	-27.12	Self-delta-pka	Nan	Nan
EADPAA	1	1	noZ	noQ4	noWater	0	Neutral	0	1-Neutral	-27.11	Self-delta-pka	Nan	Nan
LUKRAM	1	1	noZ	noQ4	noWater	0	Neutral	0	1-Neutral	-27.11	Self-delta-pka	Nan	Nan
SEDMET	1	1	noZ	noQ4	noWater	0	Neutral	0	1-Neutral	-27.11	Self-delta-pka	Nan	Nan
TEHFIV	1	1	noZ	noQ4	noWater	0	Neutral	0	1-Neutral	-27.11	Self-delta-pka	Nan	Nan
VUXGEC	1	1	noZ	noQ4	noWater	0	Neutral	0	1-Neutral	-27.11	Self-delta-pka	Nan	Nan
ZIXNAX	1	1	noZ	noQ4	noWater	0	Neutral	0	1-Neutral	-27.11	Self-delta-pka	Nan	Nan
BIJRIV	1	1	noZ	noQ4	noWater	0	Neutral	0	1-Neutral	-27.1	Self-delta-pka	Nan	Nan
IQOYES	1	1	noZ	noQ4	noWater	0	Neutral	0	1-Neutral	-27.1	Self-delta-pka	Nan	Nan
NIFGOZ	1	1	noZ	noQ4	noWater	0	Neutral	0	1-Neutral	-27.1	Self-delta-pka	Nan	Nan
RIYYUU	1	1	noZ	noQ4	noWater	0	Neutral	0	1-Neutral	-27.1	Self-delta-pka	Nan	Nan
XIYVAD	1	1	noZ	noQ4	noWater	0	Neutral	0	1-Neutral	-27.1	Self-delta-pka	Nan	Nan
YARNAH	1	1	noZ	noQ4	noWater	0	Neutral	0	1-Neutral	-27.1	Self-delta-pka	Nan	Nan
YIBXEN	1	1	noZ	noQ4	noWater	0	Neutral	0	1-Neutral	-27.1	Self-delta-pka	Nan	Nan
GACFIA	1	1	noZ	noQ4	noWater	0	Neutral	0	1-Neutral	-27.1	Self-delta-pka	Nan	Nan
FICMAI	1	1	noZ	noQ4	noWater	0	Neutral	0	1-Neutral	-27.09	Self-delta-pka	Nan	Nan
NIJHIY	1	1	noZ	noQ4	noWater	0	Neutral	0	1-Neutral	-27.09	Self-delta-pka	Nan	Nan
NOBSUU	1	1	noZ	noQ4	noWater	0	Neutral	0	1-Neutral	-27.09	Self-delta-pka	Nan	Nan
SAXQIU	1	1	noZ	noQ4	noWater	0	Neutral	0	1-Neutral	-27.09	Self-delta-pka	Nan	Nan
YIRDUY	1	1	noZ	noQ4	noWater	0	Neutral	0	1-Neutral	-27.09	Self-delta-pka	Nan	Nan
KIRKOL	1	1	noZ	noQ4	noWater	0	Neutral	0	1-Neutral	-27.09	Self-delta-pka	Nan	Nan
GOJJIY	1	1	noZ	noQ4	noWater	0	Neutral	0	1-Neutral	-27.08	Self-delta-pka	Nan	Nan
EGENAF	1	1	noZ	noQ4	noWater	0	Neutral	0	1-Neutral	-27.08	Self-delta-pka	Nan	Nan
LUCGAR	1	1	noZ	noQ4	noWater	0	Neutral	0	1-Neutral	-27.08	Self-delta-pka	Nan	Nan
UVAYUN	1	1	noZ	noQ4	noWater	0	Neutral	0	1-Neutral	-27.08	Self-delta-pka	Nan	Nan
ABEMUP	1	1	noZ	noQ4	noWater	0	Neutral	0	1-Neutral	-27.07	Self-delta-pka	Nan	Nan
WUBCUR	1	1	noZ	noQ4	noWater	0	Neutral	0	1-Neutral	-27.06	Self-delta-pka	-28.28	Self-delta-pka
JAWZIR	1	1	noZ	noQ4	noWater	0	Neutral	0	1-Neutral	-27.06	Self-delta-pka	Nan	Nan
PAGKEN	1	1	noZ	noQ4	noWater	0	Neutral	0	1-Neutral	-27.06	Self-delta-pka	Nan	Nan
ALICAZ	1	1	noZ	noQ4	noWater	0	Neutral	0	1-Neutral	-27.05	Self-delta-pka	-28.27	Self-delta-pka
FIQDEP	1	1	noZ	noQ4	noWater	0	Neutral	0	1-Neutral	-27.05	Self-delta-pka	-28.27	Self-delta-pka
FOVTAL	1	1	noZ	noQ4	noWater	0	Neutral	0	1-Neutral	-27.05	Self-delta-pka	Nan	Nan
WOXVIQ	1	1	noZ	noQ4	noWater	0	Neutral	0	1-Neutral	-27.05	Self-delta-pka	Nan	Nan
ESOVEO	1	1	noZ	noQ4	noWater	0	Neutral	0	1-Neutral	-27.04	Self-delta-pka	Nan	Nan
WAVNUE	1	1	noZ	noQ4	noWater	0	Neutral	0	1-Neutral	-27.04	Self-delta-pka	Nan	Nan
DENRIX	1	1	noZ	noQ4	noWater	0	Neutral	0	1-Neutral	-27.03	Self-delta-pka	Nan	Nan
DUWBEC	1	1	noZ	noQ4	noWater	0	Neutral	0	1-Neutral	-27.03	Self-delta-pka	Nan	Nan
FIFCUS	1	1	noZ	noQ4	noWater	0	Neutral	0	1-Neutral	-27.03	Self-delta-pka	Nan	Nan
HIBHUX	1	1	noZ	noQ4	noWater	0	Neutral	0	1-Neutral	-27.03	Self-delta-pka	Nan	Nan
HIBJAF	1	1	noZ	noQ4	noWater	0	Neutral	0	1-Neutral	-27.03	Self-delta-pka	Nan	Nan
NIJJIA	1	1	noZ	noQ4	noWater	0	Neutral	0	1-Neutral	-27.03	Self-delta-pka	Nan	Nan
EYIKON	1	1	noZ	noQ4	noWater	0	Neutral	0	1-Neutral	-27.02	Self-delta-pka	Nan	Nan
XEWCUY	1	1	noZ	noQ4	noWater	0	Neutral	0	1-Neutral	-27.02	Self-delta-pka	Nan	Nan
HEQSIH	1	1	noZ	noQ4	noWater	0	Neutral	0	1-Neutral	-27.02	Self-delta-pka	Nan	Nan
XOVMUS	1	1	noZ	noQ4	noWater	0	Neutral	0	1-Neutral	-27.02	Self-delta-pka	Nan	Nan
ZUVPOX	1	1	noZ	noQ4	noWater	0	Neutral	0	1-Neutral	-27.02	Self-delta-pka	Nan	Nan
ICOKIU	1	1	noZ	noQ4	noWater	0	Neutral	0	1-Neutral	-27.01	Self-delta-pka	Nan	Nan
XIXDEO	1	1	noZ	noQ4	noWater	0	Neutral	0	1-Neutral	-27.01	Self-delta-pka	Nan	Nan
DANJEJ01	1	1	noZ	noQ4	noWater	0	Neutral	0	1-Neutral	-27	Self-delta-pka	Nan	Nan
QODMED	1	1	noZ	noQ4	noWater	0	Neutral	0	1-Neutral	-27	Self-delta-pka	Nan	Nan
EHOSEC	1	1	noZ	noQ4	noWater	0	Neutral	0	1-Neutral	-26.99	Self-delta-pka	Nan	Nan
FAVMIZ01	1	1	noZ	noQ4	noWater	0	Neutral	0	1-Neutral	-26.99	Self-delta-pka	Nan	Nan
TEHFOB	1	1	noZ	noQ4	noWater	0	Neutral	0	1-Neutral	-26.99	Self-delta-pka	Nan	Nan
COKQID	1	1	noZ	noQ4	noWater	0	Neutral	0	1-Neutral	-26.99	Self-delta-pka	Nan	Nan
SAKJIA	1	1	noZ	noQ4	noWater	0	Neutral	0	1-Neutral	-26.98	Self-delta-pka	Nan	Nan
SOPHIO	1	1	noZ	noQ4	noWater	0	Neutral	0	1-Neutral	-26.98	Self-delta-pka	Nan	Nan
WAYTOI	1	1	noZ	noQ4	noWater	0	Neutral	0	1-Neutral	-26.97	Self-delta-pka	Nan	Nan
DUSVIX	1	1	noZ	noQ4	noWater	0	Neutral	0	1-Neutral	-26.97	Self-delta-pka	Nan	Nan
HABXAJ	1	1	noZ	noQ4	noWater	0	Neutral	0	1-Neutral	-26.97	Self-delta-pka	Nan	Nan
HUQKEL	1	1	noZ	noQ4	noWater	0	Neutral	0	1-Neutral	-26.97	Self-delta-pka	Nan	Nan
DISWEJ	1	1	noZ	noQ4	noWater	0	Neutral	0	1-Neutral	-26.96	Self-delta-pka	Nan	Nan
GEJQUK	1	1	noZ	noQ4	noWater	0	Neutral	0	1-Neutral	-26.96	Self-delta-pka	Nan	Nan
SIYJAL	1	1	noZ	noQ4	noWater	0	Neutral	0	1-Neutral	-26.96	Self-delta-pka	Nan	Nan
TIRBUT	1	1	noZ	noQ4	noWater	0	Neutral	0	1-Neutral	-26.96	Self-delta-pka	Nan	Nan
BAWYII	1	1	noZ	noQ4	noWater	0	Neutral	0	1-Neutral	-26.95	Self-delta-pka	Nan	Nan
TUTYIQ	1	1	noZ	noQ4	noWater	0	Neutral	0	1-Neutral	-26.95	Self-delta-pka	Nan	Nan
QODMON	1	1	noZ	noQ4	noWater	0	Neutral	0	1-Neutral	-26.94	Self-delta-pka	Nan	Nan
QODMUT	1	1	noZ	noQ4	noWater	0	Neutral	0	1-Neutral	-26.94	Self-delta-pka	Nan	Nan
YIJNUA	1	1	noZ	noQ4	noWater	0	Neutral	0	1-Neutral	-26.94	Self-delta-pka	Nan	Nan
FEPQUO	1	1	noZ	noQ4	noWater	0	Neutral	0	1-Neutral	-26.94	Self-delta-pka	Nan	Nan
LOYMUJ	1	1	noZ	noQ4	noWater	0	Neutral	0	1-Neutral	-26.94	Self-delta-pka	Nan	Nan
OCUKON	1	1	noZ	noQ4	noWater	0	Neutral	0	1-Neutral	-26.94	Self-delta-pka	Nan	Nan
QISSAN	1	1	noZ	noQ4	noWater	0	Neutral	0	1-Neutral	-26.94	Self-delta-pka	Nan	Nan
LASLAU	2	1	noZ	noQ4	noWater	1	Neutral	0	1-N_1-Solvate_	-26.94	Self-delta-pka	Nan	Nan
INETIE	2	2	noZ	noQ4	noWater	0	Neutral	0	2-N_	-26.94	Self-delta-pka	Nan	Nan
KOJNIG	1	1	noZ	noQ4	noWater	0	Neutral	0	1-Neutral	-26.93	Self-delta-pka	Nan	Nan
XEGLEA	1	1	noZ	noQ4	noWater	0	Neutral	0	1-Neutral	-26.93	Self-delta-pka	Nan	Nan
ZUDCIK	1	1	noZ	noQ4	noWater	0	Neutral	0	1-Neutral	-26.93	Self-delta-pka	Nan	Nan
ZUDCOQ	1	1	noZ	noQ4	noWater	0	Neutral	0	1-Neutral	-26.93	Self-delta-pka	Nan	Nan
RUSGIX	1	1	noZ	noQ4	noWater	0	Neutral	0	1-Neutral	-26.92	Self-delta-pka	-28.24	Self-delta-pka
BYACCO	1	1	noZ	noQ4	noWater	0	Neutral	0	1-Neutral	-26.92	Self-delta-pka	Nan	Nan
INUKUY	1	1	noZ	noQ4	noWater	0	Neutral	0	1-Neutral	-26.92	Self-delta-pka	Nan	Nan
CHXBQU	1	1	noZ	noQ4	noWater	0	Neutral	0	1-Neutral	-26.92	Self-delta-pka	Nan	Nan
IDEWUK	1	1	noZ	noQ4	noWater	0	Neutral	0	1-Neutral	-26.92	Self-delta-pka	Nan	Nan
TCTDTO20	1	1	noZ	noQ4	noWater	0	Neutral	0	1-Neutral	-26.92	Self-delta-pka	Nan	Nan
VESFAB	1	1	noZ	noQ4	noWater	0	Neutral	0	1-Neutral	-26.92	Self-delta-pka	Nan	Nan
AHUDOY	1	1	noZ	noQ4	noWater	0	Neutral	0	1-Neutral	-26.91	Self-delta-pka	Nan	Nan
CAPMOV	1	1	noZ	noQ4	noWater	0	Neutral	0	1-Neutral	-26.91	Self-delta-pka	Nan	Nan
GEBRAG	1	1	noZ	noQ4	noWater	0	Neutral	0	1-Neutral	-26.91	Self-delta-pka	Nan	Nan
LUGXUG	1	1	noZ	noQ4	noWater	0	Neutral	0	1-Neutral	-26.91	Self-delta-pka	Nan	Nan
NEWCAU	1	1	noZ	noQ4	noWater	0	Neutral	0	1-Neutral	-26.91	Self-delta-pka	Nan	Nan
RETKUY	1	1	noZ	noQ4	noWater	0	Neutral	0	1-Neutral	-26.91	Self-delta-pka	Nan	Nan
ALEJEH	1	1	noZ	noQ4	noWater	0	Neutral	0	1-Neutral	-26.9	Self-delta-pka	Nan	Nan
LIZPER	1	1	noZ	noQ4	noWater	0	Neutral	0	1-Neutral	-26.9	Self-delta-pka	Nan	Nan
NACJEG	1	1	noZ	noQ4	noWater	0	Neutral	0	1-Neutral	-26.9	Self-delta-pka	Nan	Nan
ROMKOW	1	1	noZ	noQ4	noWater	0	Neutral	0	1-Neutral	-26.9	Self-delta-pka	Nan	Nan
XOTHUK	1	1	noZ	noQ4	noWater	0	Neutral	0	1-Neutral	-26.9	Self-delta-pka	Nan	Nan
COKQOJ	1	1	noZ	noQ4	noWater	0	Neutral	0	1-Neutral	-26.89	Self-delta-pka	Nan	Nan
HEBBIZ	1	1	noZ	noQ4	noWater	0	Neutral	0	1-Neutral	-26.89	Self-delta-pka	Nan	Nan
HMTANQ02	1	1	noZ	noQ4	noWater	0	Neutral	0	1-Neutral	-26.89	Self-delta-pka	Nan	Nan
HMTANQ04	1	1	noZ	noQ4	noWater	0	Neutral	0	1-Neutral	-26.89	Self-delta-pka	Nan	Nan
NIBYOM	1	1	noZ	noQ4	noWater	0	Neutral	0	1-Neutral	-26.89	Self-delta-pka	Nan	Nan
QUXDEU	1	1	noZ	noQ4	noWater	0	Neutral	0	1-Neutral	-26.89	Self-delta-pka	Nan	Nan
TAZLEL	1	1	noZ	noQ4	noWater	0	Neutral	0	1-Neutral	-26.89	Self-delta-pka	Nan	Nan
MUDDAR	1	1	noZ	noQ4	noWater	0	Neutral	0	1-Neutral	-26.88	Self-delta-pka	Nan	Nan
LUMHEI	1	1	noZ	noQ4	noWater	0	Neutral	0	1-Neutral	-26.88	Self-delta-pka	Nan	Nan
OCETIC	1	1	noZ	noQ4	noWater	0	Neutral	0	1-Neutral	-26.88	Self-delta-pka	Nan	Nan
SUKWOL	1	1	noZ	noQ4	noWater	0	Neutral	0	1-Neutral	-26.88	Self-delta-pka	Nan	Nan
TEKMII	1	1	noZ	noQ4	noWater	0	Neutral	0	1-Neutral	-26.88	Self-delta-pka	Nan	Nan
EQASOF	1	1	noZ	noQ4	noWater	0	Neutral	0	1-Neutral	-26.87	Self-delta-pka	Nan	Nan
MIXWEX	1	1	noZ	noQ4	noWater	0	Neutral	0	1-Neutral	-26.87	Self-delta-pka	Nan	Nan
YOMZIK	1	1	noZ	noQ4	noWater	0	Neutral	0	1-Neutral	-26.87	Self-delta-pka	Nan	Nan
VUNLAT	1	1	noZ	noQ4	noWater	0	Neutral	0	1-Neutral	-26.87	Self-delta-pka	Nan	Nan
ZUDCUW	1	1	noZ	noQ4	noWater	0	Neutral	0	1-Neutral	-26.87	Self-delta-pka	Nan	Nan
YANLUX	1	1	noZ	noQ4	noWater	0	Neutral	0	1-Neutral	-26.87	Self-delta-pka	Nan	Nan
FIHVIC	1	1	noZ	noQ4	noWater	0	Neutral	0	1-Neutral	-26.87	Self-delta-pka	Nan	Nan
KAJHUY	1	1	noZ	noQ4	noWater	0	Neutral	0	1-Neutral	-26.87	Self-delta-pka	Nan	Nan
WESVIZ	1	1	noZ	noQ4	noWater	0	Neutral	0	1-Neutral	-26.87	Self-delta-pka	Nan	Nan
LILCEO	1	1	noZ	noQ4	noWater	0	Neutral	0	1-Neutral	-26.86	Self-delta-pka	Nan	Nan
HEYMAA	1	1	noZ	noQ4	noWater	0	Neutral	0	1-Neutral	-26.86	Self-delta-pka	Nan	Nan
VESBUR	1	1	noZ	noQ4	noWater	0	Neutral	0	1-Neutral	-26.86	Self-delta-pka	Nan	Nan
IRUTUM	1	1	noZ	noQ4	noWater	0	Neutral	0	1-Neutral	-26.85	Self-delta-pka	Nan	Nan
LUZZOX	1	1	noZ	noQ4	noWater	0	Neutral	0	1-Neutral	-26.85	Self-delta-pka	Nan	Nan
OHUNAH	1	1	noZ	noQ4	noWater	0	Neutral	0	1-Neutral	-26.85	Self-delta-pka	Nan	Nan
POTFUZ	1	1	noZ	noQ4	noWater	0	Neutral	0	1-Neutral	-26.85	Self-delta-pka	Nan	Nan
LABBAU	2	1	noZ	noQ4	noWater	1	Neutral	0	1-N_1-Solvate_	-26.85	Self-delta-pka	Nan	Nan
ELUWIS	1	1	noZ	noQ4	noWater	0	Neutral	0	1-Neutral	-26.84	Self-delta-pka	Nan	Nan
MMYBOC	1	1	noZ	noQ4	noWater	0	Neutral	0	1-Neutral	-26.84	Self-delta-pka	Nan	Nan
BARZEZ	1	1	noZ	noQ4	noWater	0	Neutral	0	1-Neutral	-26.83	Self-delta-pka	Nan	Nan
DIWSAF	1	1	noZ	noQ4	noWater	0	Neutral	0	1-Neutral	-26.83	Self-delta-pka	Nan	Nan
SEJTAC	1	1	noZ	noQ4	noWater	0	Neutral	0	1-Neutral	-26.83	Self-delta-pka	Nan	Nan
IGOQEC	1	1	noZ	noQ4	noWater	0	Neutral	0	1-Neutral	-26.83	Self-delta-pka	Nan	Nan
LILBAJ	1	1	noZ	noQ4	noWater	0	Neutral	0	1-Neutral	-26.83	Self-delta-pka	Nan	Nan
MEQDUH	1	1	noZ	noQ4	noWater	0	Neutral	0	1-Neutral	-26.83	Self-delta-pka	Nan	Nan
PACXUQ	1	1	noZ	noQ4	noWater	0	Neutral	0	1-Neutral	-26.82	Self-delta-pka	Nan	Nan
INUFAZ	1	1	noZ	noQ4	noWater	0	Neutral	0	1-Neutral	-26.82	Self-delta-pka	Nan	Nan
MUSVAZ04	1	1	noZ	noQ4	noWater	0	Neutral	0	1-Neutral	-26.82	Self-delta-pka	Nan	Nan
PEPHAW	1	1	noZ	noQ4	noWater	0	Neutral	0	1-Neutral	-26.82	Self-delta-pka	Nan	Nan
QDRONE01	1	1	noZ	noQ4	noWater	0	Neutral	0	1-Neutral	-26.82	Self-delta-pka	Nan	Nan
QODNII	1	1	noZ	noQ4	noWater	0	Neutral	0	1-Neutral	-26.82	Self-delta-pka	Nan	Nan
QODNOO	1	1	noZ	noQ4	noWater	0	Neutral	0	1-Neutral	-26.82	Self-delta-pka	Nan	Nan
QODNUU	1	1	noZ	noQ4	noWater	0	Neutral	0	1-Neutral	-26.82	Self-delta-pka	Nan	Nan
YUQVUD	1	1	noZ	noQ4	noWater	0	Neutral	0	1-Neutral	-26.82	Self-delta-pka	Nan	Nan
YINVUM	1	1	noZ	noQ4	noWater	0	Neutral	0	1-Neutral	-26.82	Self-delta-pka	Nan	Nan
DIWPII	1	1	noZ	noQ4	noWater	0	Neutral	0	1-Neutral	-26.81	Self-delta-pka	Nan	Nan
IVIFAV	1	1	noZ	noQ4	noWater	0	Neutral	0	1-Neutral	-26.81	Self-delta-pka	Nan	Nan
JIXNIQ	1	1	noZ	noQ4	noWater	0	Neutral	0	1-Neutral	-26.81	Self-delta-pka	Nan	Nan
NEPGOH	1	1	noZ	noQ4	noWater	0	Neutral	0	1-Neutral	-26.81	Self-delta-pka	Nan	Nan
JEHRUK	1	1	noZ	noQ4	noWater	0	Neutral	0	1-Neutral	-26.8	Self-delta-pka	Nan	Nan
PROPTO	1	1	noZ	noQ4	noWater	0	Neutral	0	1-Neutral	-26.8	Self-delta-pka	Nan	Nan
ROFYEQ	1	1	noZ	noQ4	noWater	0	Neutral	0	1-Neutral	-26.8	Self-delta-pka	Nan	Nan
TCDODP	1	1	noZ	noQ4	noWater	0	Neutral	0	1-Neutral	-26.8	Self-delta-pka	Nan	Nan
YIYRUV	1	1	noZ	noQ4	noWater	0	Neutral	0	1-Neutral	-26.8	Self-delta-pka	Nan	Nan
YIYSAC	1	1	noZ	noQ4	noWater	0	Neutral	0	1-Neutral	-26.8	Self-delta-pka	Nan	Nan
FOZKUA	1	1	noZ	noQ4	noWater	0	Neutral	0	1-Neutral	-26.8	Self-delta-pka	Nan	Nan
SORCIL	1	1	noZ	noQ4	noWater	0	Neutral	0	1-Neutral	-26.8	Self-delta-pka	Nan	Nan
CUMTOT	1	1	noZ	noQ4	noWater	0	Neutral	0	1-Neutral	-26.79	Self-delta-pka	Nan	Nan
FOBPAO	1	1	noZ	noQ4	noWater	0	Neutral	0	1-Neutral	-26.79	Self-delta-pka	Nan	Nan
HABJAV	1	1	noZ	noQ4	noWater	0	Neutral	0	1-Neutral	-26.79	Self-delta-pka	Nan	Nan
NULZUR	1	1	noZ	noQ4	noWater	0	Neutral	0	1-Neutral	-26.79	Self-delta-pka	Nan	Nan
PEZYUR	1	1	noZ	noQ4	noWater	0	Neutral	0	1-Neutral	-26.79	Self-delta-pka	Nan	Nan
QUKFIN	1	1	noZ	noQ4	noWater	0	Neutral	0	1-Neutral	-26.79	Self-delta-pka	Nan	Nan
PACXOK	1	1	noZ	noQ4	noWater	0	Neutral	0	1-Neutral	-26.78	Self-delta-pka	Nan	Nan
ABZCTD	1	1	noZ	noQ4	noWater	0	Neutral	0	1-Neutral	-26.78	Self-delta-pka	Nan	Nan
CEVVOO	1	1	noZ	noQ4	noWater	0	Neutral	0	1-Neutral	-26.78	Self-delta-pka	Nan	Nan
IQACIO	1	1	noZ	noQ4	noWater	0	Neutral	0	1-Neutral	-26.78	Self-delta-pka	Nan	Nan
KAVDOA	1	1	noZ	noQ4	noWater	0	Neutral	0	1-Neutral	-26.78	Self-delta-pka	Nan	Nan
KAVDUG	1	1	noZ	noQ4	noWater	0	Neutral	0	1-Neutral	-26.78	Self-delta-pka	Nan	Nan
KIXGUU	1	1	noZ	noQ4	noWater	0	Neutral	0	1-Neutral	-26.78	Self-delta-pka	Nan	Nan
OPOFAC	1	1	noZ	noQ4	noWater	0	Neutral	0	1-Neutral	-26.78	Self-delta-pka	Nan	Nan
WAXRUK	1	1	noZ	noQ4	noWater	0	Neutral	0	1-Neutral	-26.78	Self-delta-pka	Nan	Nan
XAHHUK	1	1	noZ	noQ4	noWater	0	Neutral	0	1-Neutral	-26.78	Self-delta-pka	Nan	Nan
BUYHAE	1	1	noZ	noQ4	noWater	0	Neutral	0	1-Neutral	-26.77	Self-delta-pka	Nan	Nan
IDANEH	1	1	noZ	noQ4	noWater	0	Neutral	0	1-Neutral	-26.77	Self-delta-pka	Nan	Nan
QAHHEO	1	1	noZ	noQ4	noWater	0	Neutral	0	1-Neutral	-26.77	Self-delta-pka	Nan	Nan
TAFXED	1	1	noZ	noQ4	noWater	0	Neutral	0	1-Neutral	-26.77	Self-delta-pka	Nan	Nan
RELPEF	1	1	noZ	noQ4	noWater	0	Neutral	0	1-Neutral	-26.76	Self-delta-pka	Nan	Nan
RELPIJ	1	1	noZ	noQ4	noWater	0	Neutral	0	1-Neutral	-26.76	Self-delta-pka	Nan	Nan
ABIFUP	1	1	noZ	noQ4	noWater	0	Neutral	0	1-Neutral	-26.76	Self-delta-pka	Nan	Nan
NEPBUG	1	1	noZ	noQ4	noWater	0	Neutral	0	1-Neutral	-26.76	Self-delta-pka	Nan	Nan
QOJREO	1	1	noZ	noQ4	noWater	0	Neutral	0	1-Neutral	-26.76	Self-delta-pka	Nan	Nan
VESBEB	1	1	noZ	noQ4	noWater	0	Neutral	0	1-Neutral	-26.76	Self-delta-pka	Nan	Nan
BOJVUS	1	1	noZ	noQ4	noWater	0	Neutral	0	1-Neutral	-26.75	Self-delta-pka	Nan	Nan
FOZKOU	1	1	noZ	noQ4	noWater	0	Neutral	0	1-Neutral	-26.75	Self-delta-pka	Nan	Nan
MNAPOD10	1	1	noZ	noQ4	noWater	0	Neutral	0	1-Neutral	-26.75	Self-delta-pka	Nan	Nan
NETCUL	1	1	noZ	noQ4	noWater	0	Neutral	0	1-Neutral	-26.75	Self-delta-pka	Nan	Nan
PEZKIO	1	1	noZ	noQ4	noWater	0	Neutral	0	1-Neutral	-26.75	Self-delta-pka	Nan	Nan
ROBZEQ	1	1	noZ	noQ4	noWater	0	Neutral	0	1-Neutral	-26.75	Self-delta-pka	Nan	Nan
TEXLIT	1	1	noZ	noQ4	noWater	0	Neutral	0	1-Neutral	-26.75	Self-delta-pka	Nan	Nan
TIMZAS	1	1	noZ	noQ4	noWater	0	Neutral	0	1-Neutral	-26.75	Self-delta-pka	Nan	Nan
ZORYIO	1	1	noZ	noQ4	noWater	0	Neutral	0	1-Neutral	-26.75	Self-delta-pka	Nan	Nan
EHEKAE	1	1	noZ	noQ4	noWater	0	Neutral	0	1-Neutral	-26.74	Self-delta-pka	Nan	Nan
HIDFOS	1	1	noZ	noQ4	noWater	0	Neutral	0	1-Neutral	-26.74	Self-delta-pka	Nan	Nan
XELZEW	1	1	noZ	noQ4	noWater	0	Neutral	0	1-Neutral	-26.74	Self-delta-pka	Nan	Nan
HMPCDO20	1	1	noZ	noQ4	noWater	0	Neutral	0	1-Neutral	-26.74	Self-delta-pka	Nan	Nan
NPCPMK	1	1	noZ	noQ4	noWater	0	Neutral	0	1-Neutral	-26.74	Self-delta-pka	Nan	Nan
REZBUU	1	1	noZ	noQ4	noWater	0	Neutral	0	1-Neutral	-26.74	Self-delta-pka	Nan	Nan
TIJNEH	1	1	noZ	noQ4	noWater	0	Neutral	0	1-Neutral	-26.74	Self-delta-pka	Nan	Nan
YENLIN	1	1	noZ	noQ4	noWater	0	Neutral	0	1-Neutral	-26.74	Self-delta-pka	Nan	Nan
MENPPO	1	1	noZ	noQ4	noWater	0	Neutral	0	1-Neutral	-26.73	Self-delta-pka	Nan	Nan
POVBIL	1	1	noZ	noQ4	noWater	0	Neutral	0	1-Neutral	-26.73	Self-delta-pka	Nan	Nan
TUBVIV	1	1	noZ	noQ4	noWater	0	Neutral	0	1-Neutral	-26.73	Self-delta-pka	Nan	Nan
XOYXUE	1	1	noZ	noQ4	noWater	0	Neutral	0	1-Neutral	-26.73	Self-delta-pka	Nan	Nan
XUXKAD	1	1	noZ	noQ4	noWater	0	Neutral	0	1-Neutral	-26.73	Self-delta-pka	Nan	Nan
YOMZOQ	1	1	noZ	noQ4	noWater	0	Neutral	0	1-Neutral	-26.73	Self-delta-pka	Nan	Nan
WAXSAR	1	1	noZ	noQ4	noWater	0	Neutral	0	1-Neutral	-26.73	Self-delta-pka	Nan	Nan
ZIZGAQ	1	1	noZ	noQ4	noWater	0	Neutral	0	1-Neutral	-26.73	Self-delta-pka	Nan	Nan
PURSOM	1	1	noZ	noQ4	noWater	0	Neutral	0	1-Neutral	-26.72	Self-delta-pka	Nan	Nan
PURSUS	1	1	noZ	noQ4	noWater	0	Neutral	0	1-Neutral	-26.72	Self-delta-pka	Nan	Nan
YAZXIJ	1	1	noZ	noQ4	noWater	0	Neutral	0	1-Neutral	-26.72	Self-delta-pka	Nan	Nan
AFOLEO	1	1	noZ	noQ4	noWater	0	Neutral	0	1-Neutral	-26.72	Self-delta-pka	Nan	Nan
FIFCOM	1	1	noZ	noQ4	noWater	0	Neutral	0	1-Neutral	-26.72	Self-delta-pka	Nan	Nan
KEMPEN	1	1	noZ	noQ4	noWater	0	Neutral	0	1-Neutral	-26.72	Self-delta-pka	Nan	Nan
NOPLAG	1	1	noZ	noQ4	noWater	0	Neutral	0	1-Neutral	-26.72	Self-delta-pka	Nan	Nan
PODFAP	1	1	noZ	noQ4	noWater	0	Neutral	0	1-Neutral	-26.72	Self-delta-pka	Nan	Nan
BOVVOX	1	1	noZ	noQ4	noWater	0	Neutral	0	1-Neutral	-26.71	Self-delta-pka	Nan	Nan
KEPBAJ	1	1	noZ	noQ4	noWater	0	Neutral	0	1-Neutral	-26.71	Self-delta-pka	Nan	Nan
PUSDEM	1	1	noZ	noQ4	noWater	0	Neutral	0	1-Neutral	-26.71	Self-delta-pka	Nan	Nan
REDBUY	1	1	noZ	noQ4	noWater	0	Neutral	0	1-Neutral	-26.71	Self-delta-pka	Nan	Nan
ROTRUP	1	1	noZ	noQ4	noWater	0	Neutral	0	1-Neutral	-26.71	Self-delta-pka	Nan	Nan
RUFJIL	1	1	noZ	noQ4	noWater	0	Neutral	0	1-Neutral	-26.71	Self-delta-pka	Nan	Nan
WOBMAD	1	1	noZ	noQ4	noWater	0	Neutral	0	1-Neutral	-26.71	Self-delta-pka	Nan	Nan
YOMZUW	1	1	noZ	noQ4	noWater	0	Neutral	0	1-Neutral	-26.71	Self-delta-pka	Nan	Nan
HIXHIF01	1	1	noZ	noQ4	noWater	0	Neutral	0	1-Neutral	-26.7	Self-delta-pka	Nan	Nan
HIXHIF02	1	1	noZ	noQ4	noWater	0	Neutral	0	1-Neutral	-26.7	Self-delta-pka	Nan	Nan
HIXHIF03	1	1	noZ	noQ4	noWater	0	Neutral	0	1-Neutral	-26.7	Self-delta-pka	Nan	Nan
HIXHIF05	1	1	noZ	noQ4	noWater	0	Neutral	0	1-Neutral	-26.7	Self-delta-pka	Nan	Nan
VIXJOC	1	1	noZ	noQ4	noWater	0	Neutral	0	1-Neutral	-26.7	Self-delta-pka	Nan	Nan
CUBRUN	1	1	noZ	noQ4	noWater	0	Neutral	0	1-Neutral	-26.7	Self-delta-pka	Nan	Nan
ETOXPA	1	1	noZ	noQ4	noWater	0	Neutral	0	1-Neutral	-26.7	Self-delta-pka	Nan	Nan
ETOXPB	1	1	noZ	noQ4	noWater	0	Neutral	0	1-Neutral	-26.7	Self-delta-pka	Nan	Nan
ETOXPC	1	1	noZ	noQ4	noWater	0	Neutral	0	1-Neutral	-26.7	Self-delta-pka	Nan	Nan
LIHMOG	1	1	noZ	noQ4	noWater	0	Neutral	0	1-Neutral	-26.7	Self-delta-pka	Nan	Nan
TUZSAL	1	1	noZ	noQ4	noWater	0	Neutral	0	1-Neutral	-26.69	Self-delta-pka	Nan	Nan
CORWOW	1	1	noZ	noQ4	noWater	0	Neutral	0	1-Neutral	-26.69	Self-delta-pka	Nan	Nan
NAFCEC	1	1	noZ	noQ4	noWater	0	Neutral	0	1-Neutral	-26.69	Self-delta-pka	Nan	Nan
REWSOD	1	1	noZ	noQ4	noWater	0	Neutral	0	1-Neutral	-26.69	Self-delta-pka	Nan	Nan
VUGVUQ	1	1	noZ	noQ4	noWater	0	Neutral	0	1-Neutral	-26.69	Self-delta-pka	Nan	Nan
XUCLEO	1	1	noZ	noQ4	noWater	0	Neutral	0	1-Neutral	-26.69	Self-delta-pka	Nan	Nan
ZIVCIQ	1	1	noZ	noQ4	noWater	0	Neutral	0	1-Neutral	-26.69	Self-delta-pka	Nan	Nan
LIZFAD	1	1	noZ	noQ4	noWater	0	Neutral	0	1-Neutral	-26.69	Self-delta-pka	Nan	Nan
TEXLEP	1	1	noZ	noQ4	noWater	0	Neutral	0	1-Neutral	-26.69	Self-delta-pka	Nan	Nan
XEZGIT	1	1	noZ	noQ4	noWater	0	Neutral	0	1-Neutral	-26.69	Self-delta-pka	Nan	Nan
ZETWUT	1	1	noZ	noQ4	noWater	0	Neutral	0	1-Neutral	-26.68	Self-delta-pka	-28.52	Self-delta-pka
EVIBOA	1	1	noZ	noQ4	noWater	0	Neutral	0	1-Neutral	-26.68	Self-delta-pka	Nan	Nan
FORSAI	1	1	noZ	noQ4	noWater	0	Neutral	0	1-Neutral	-26.68	Self-delta-pka	Nan	Nan
HUMTOZ	1	1	noZ	noQ4	noWater	0	Neutral	0	1-Neutral	-26.68	Self-delta-pka	Nan	Nan
IBIBOM	1	1	noZ	noQ4	noWater	0	Neutral	0	1-Neutral	-26.68	Self-delta-pka	Nan	Nan
IBIBUS	1	1	noZ	noQ4	noWater	0	Neutral	0	1-Neutral	-26.68	Self-delta-pka	Nan	Nan
LITCUP	1	1	noZ	noQ4	noWater	0	Neutral	0	1-Neutral	-26.68	Self-delta-pka	Nan	Nan
LODDIR	1	1	noZ	noQ4	noWater	0	Neutral	0	1-Neutral	-26.68	Self-delta-pka	Nan	Nan
MIZLIS	1	1	noZ	noQ4	noWater	0	Neutral	0	1-Neutral	-26.68	Self-delta-pka	Nan	Nan
POGVUD	1	1	noZ	noQ4	noWater	0	Neutral	0	1-Neutral	-26.68	Self-delta-pka	Nan	Nan
YOMZEG	1	1	noZ	noQ4	noWater	0	Neutral	0	1-Neutral	-26.68	Self-delta-pka	Nan	Nan
ZOBGUV	1	1	noZ	noQ4	noWater	0	Neutral	0	1-Neutral	-26.68	Self-delta-pka	Nan	Nan
ZARCIH	1	1	noZ	noQ4	noWater	0	Neutral	0	1-Neutral	-26.68	Self-delta-pka	Nan	Nan
HUYBEJ	1	1	Zwit	Q4	noWater	0	Neutral	0	1-NeutralZQ4	-26.68	Self-delta-pka	Nan	Nan
OJUKAI	1	1	noZ	noQ4	noWater	0	Neutral	0	1-Neutral	-26.67	Self-delta-pka	Nan	Nan
EKITOH	1	1	noZ	noQ4	noWater	0	Neutral	0	1-Neutral	-26.67	Self-delta-pka	Nan	Nan
KACSAL	1	1	noZ	noQ4	noWater	0	Neutral	0	1-Neutral	-26.67	Self-delta-pka	Nan	Nan
KICSOH	1	1	noZ	noQ4	noWater	0	Neutral	0	1-Neutral	-26.67	Self-delta-pka	Nan	Nan
RIGVEI	1	1	noZ	noQ4	noWater	0	Neutral	0	1-Neutral	-26.67	Self-delta-pka	Nan	Nan
UBUNIO	1	1	noZ	noQ4	noWater	0	Neutral	0	1-Neutral	-26.67	Self-delta-pka	Nan	Nan
YIVGIU	1	1	noZ	noQ4	noWater	0	Neutral	0	1-Neutral	-26.67	Self-delta-pka	Nan	Nan
XEYKER	1	1	noZ	noQ4	noWater	0	Neutral	0	1-Neutral	-26.67	Self-delta-pka	Nan	Nan
BOJYEE	1	1	noZ	noQ4	noWater	0	Neutral	0	1-Neutral	-26.67	Self-delta-pka	Nan	Nan
MONVOA	1	1	noZ	noQ4	noWater	0	Neutral	0	1-Neutral	-26.67	Self-delta-pka	Nan	Nan
NEWBUN	1	1	noZ	noQ4	noWater	0	Neutral	0	1-Neutral	-26.67	Self-delta-pka	Nan	Nan
FUFCOA	1	1	noZ	noQ4	noWater	0	Neutral	0	1-Neutral	-26.66	Self-delta-pka	Nan	Nan
XASTUG	1	1	noZ	noQ4	noWater	0	Neutral	0	1-Neutral	-26.66	Self-delta-pka	Nan	Nan
FAXPAV	1	1	noZ	noQ4	noWater	0	Neutral	0	1-Neutral	-26.66	Self-delta-pka	Nan	Nan
HOLRAB	1	1	noZ	noQ4	noWater	0	Neutral	0	1-Neutral	-26.66	Self-delta-pka	Nan	Nan
XIFDUO	1	1	noZ	noQ4	noWater	0	Neutral	0	1-Neutral	-26.66	Self-delta-pka	Nan	Nan
NISVAP	1	1	noZ	noQ4	noWater	0	Neutral	0	1-Neutral	-26.65	Self-delta-pka	Nan	Nan
PULSUL	1	1	noZ	noQ4	noWater	0	Neutral	0	1-Neutral	-26.65	Self-delta-pka	Nan	Nan
XERGEJ	1	1	noZ	noQ4	noWater	0	Neutral	0	1-Neutral	-26.65	Self-delta-pka	Nan	Nan
XERTOG	1	1	noZ	noQ4	noWater	0	Neutral	0	1-Neutral	-26.65	Self-delta-pka	Nan	Nan
XIMVOH	1	1	noZ	noQ4	noWater	0	Neutral	0	1-Neutral	-26.65	Self-delta-pka	Nan	Nan
KANXEF	1	1	noZ	noQ4	noWater	0	Neutral	0	1-Neutral	-26.65	Self-delta-pka	Nan	Nan
NEMPUR	1	1	noZ	noQ4	noWater	0	Neutral	0	1-Neutral	-26.65	Self-delta-pka	Nan	Nan
XORBIP	1	1	noZ	noQ4	noWater	0	Neutral	0	1-Neutral	-26.65	Self-delta-pka	Nan	Nan
BINTUN	1	1	noZ	noQ4	noWater	0	Neutral	0	1-Neutral	-26.64	Self-delta-pka	Nan	Nan
DIFNIQ	1	1	noZ	noQ4	noWater	0	Neutral	0	1-Neutral	-26.64	Self-delta-pka	Nan	Nan
HOPPAE	1	1	noZ	noQ4	noWater	0	Neutral	0	1-Neutral	-26.64	Self-delta-pka	Nan	Nan
NAFCEF	1	1	noZ	noQ4	noWater	0	Neutral	0	1-Neutral	-26.63	Self-delta-pka	Nan	Nan
JAVLAT	1	1	noZ	noQ4	noWater	0	Neutral	0	1-Neutral	-26.63	Self-delta-pka	Nan	Nan
YEHHEY	1	1	noZ	noQ4	noWater	0	Neutral	0	1-Neutral	-26.63	Self-delta-pka	Nan	Nan
QISYOG	1	1	noZ	noQ4	noWater	0	Neutral	0	1-Neutral	-26.62	Self-delta-pka	Nan	Nan
VESBIF	1	1	noZ	noQ4	noWater	0	Neutral	0	1-Neutral	-26.62	Self-delta-pka	Nan	Nan
XAKMIF	1	1	noZ	noQ4	noWater	0	Neutral	0	1-Neutral	-26.62	Self-delta-pka	Nan	Nan
BIMSAS	1	1	noZ	noQ4	noWater	0	Neutral	0	1-Neutral	-26.62	Self-delta-pka	Nan	Nan
IQEROM	1	1	noZ	noQ4	noWater	0	Neutral	0	1-Neutral	-26.62	Self-delta-pka	Nan	Nan
UNOBOO	1	1	noZ	noQ4	noWater	0	Neutral	0	1-Neutral	-26.62	Self-delta-pka	Nan	Nan
VAWZAW	1	1	noZ	noQ4	noWater	0	Neutral	0	1-Neutral	-26.62	Self-delta-pka	Nan	Nan
CEMGUY	1	1	noZ	noQ4	noWater	0	Neutral	0	1-Neutral	-26.61	Self-delta-pka	Nan	Nan
HOGKUM	1	1	noZ	noQ4	noWater	0	Neutral	0	1-Neutral	-26.61	Self-delta-pka	Nan	Nan
NIJHUK	1	1	noZ	noQ4	noWater	0	Neutral	0	1-Neutral	-26.61	Self-delta-pka	Nan	Nan
WIFSUC	1	1	noZ	noQ4	noWater	0	Neutral	0	1-Neutral	-26.61	Self-delta-pka	Nan	Nan
WABSIE	1	1	noZ	noQ4	noWater	0	Neutral	0	1-Neutral	-26.61	Self-delta-pka	Nan	Nan
WAFLOG	1	1	noZ	noQ4	noWater	0	Neutral	0	1-Neutral	-26.61	Self-delta-pka	Nan	Nan
DASFOV	1	1	noZ	noQ4	noWater	0	Neutral	0	1-Neutral	-26.6	Self-delta-pka	Nan	Nan
GEJHAE	1	1	noZ	noQ4	noWater	0	Neutral	0	1-Neutral	-26.6	Self-delta-pka	Nan	Nan
IPUTUJ	1	1	noZ	noQ4	noWater	0	Neutral	0	1-Neutral	-26.6	Self-delta-pka	Nan	Nan
RAMHIZ	1	1	noZ	noQ4	noWater	0	Neutral	0	1-Neutral	-26.6	Self-delta-pka	Nan	Nan
REQROX	1	1	noZ	noQ4	noWater	0	Neutral	0	1-Neutral	-26.6	Self-delta-pka	Nan	Nan
TXSPEI	1	1	noZ	noQ4	noWater	0	Neutral	0	1-Neutral	-26.6	Self-delta-pka	Nan	Nan
ZZZMAY01	1	1	noZ	noQ4	noWater	0	Neutral	0	1-Neutral	-26.6	Self-delta-pka	Nan	Nan
COQCUG	1	1	noZ	noQ4	noWater	0	Neutral	0	1-Neutral	-26.6	Self-delta-pka	Nan	Nan
XUXMEI	1	1	noZ	noQ4	noWater	0	Neutral	0	1-Neutral	-26.6	Self-delta-pka	Nan	Nan
WIRFEL	1	1	noZ	noQ4	noWater	0	Neutral	0	1-Neutral	-26.6	Self-delta-pka	Nan	Nan
BUYJEL	1	1	noZ	noQ4	noWater	0	Neutral	0	1-Neutral	-26.59	Self-delta-pka	Nan	Nan
EFATIQ	1	1	noZ	noQ4	noWater	0	Neutral	0	1-Neutral	-26.59	Self-delta-pka	Nan	Nan
JOYNIW	1	1	noZ	noQ4	noWater	0	Neutral	0	1-Neutral	-26.59	Self-delta-pka	Nan	Nan
PCPOND20	1	1	noZ	noQ4	noWater	0	Neutral	0	1-Neutral	-26.59	Self-delta-pka	Nan	Nan
TIDJIA	1	1	noZ	noQ4	noWater	0	Neutral	0	1-Neutral	-26.59	Self-delta-pka	Nan	Nan
WIRDUZ	1	1	noZ	noQ4	noWater	0	Neutral	0	1-Neutral	-26.59	Self-delta-pka	Nan	Nan
YOMPIA	1	1	noZ	noQ4	noWater	0	Neutral	0	1-Neutral	-26.59	Self-delta-pka	Nan	Nan
BESFIP	1	1	noZ	noQ4	noWater	0	Neutral	0	1-Neutral	-26.58	Self-delta-pka	Nan	Nan
KAPSTY	1	1	noZ	noQ4	noWater	0	Neutral	0	1-Neutral	-26.58	Self-delta-pka	Nan	Nan
OFOQIL	1	1	noZ	noQ4	noWater	0	Neutral	0	1-Neutral	-26.58	Self-delta-pka	Nan	Nan
AXSCHO	1	1	noZ	noQ4	noWater	0	Neutral	0	1-Neutral	-26.58	Self-delta-pka	Nan	Nan
MACPEN	1	1	noZ	noQ4	noWater	0	Neutral	0	1-Neutral	-26.57	Self-delta-pka	Nan	Nan
WIWDUB01	1	1	noZ	noQ4	noWater	0	Neutral	0	1-Neutral	-26.57	Self-delta-pka	Nan	Nan
HACFIA	1	1	Zwit	Q4	noWater	0	Neutral	0	1-NeutralZQ4	-26.57	Self-delta-pka	Nan	Nan
FUFJOH	2	1	noZ	noQ4	noWater	1	Neutral	0	1-N_1-Solvate_	-26.57	Self-delta-pka	Nan	Nan
OJUKEM	1	1	noZ	noQ4	noWater	0	Neutral	0	1-Neutral	-26.56	Self-delta-pka	Nan	Nan
FUFMUO	1	1	noZ	noQ4	noWater	0	Neutral	0	1-Neutral	-26.56	Self-delta-pka	Nan	Nan
VIZZUZ	1	1	noZ	noQ4	noWater	0	Neutral	0	1-Neutral	-26.56	Self-delta-pka	Nan	Nan
BINGOU	1	1	noZ	noQ4	noWater	0	Neutral	0	1-Neutral	-26.56	Self-delta-pka	Nan	Nan
IFADUR	1	1	noZ	noQ4	noWater	0	Neutral	0	1-Neutral	-26.56	Self-delta-pka	Nan	Nan
PAXQUB	1	1	noZ	noQ4	noWater	0	Neutral	0	1-Neutral	-26.56	Self-delta-pka	Nan	Nan
PAZJUW	1	1	noZ	noQ4	noWater	0	Neutral	0	1-Neutral	-26.56	Self-delta-pka	Nan	Nan
TAGCEJ	1	1	noZ	noQ4	noWater	0	Neutral	0	1-Neutral	-26.56	Self-delta-pka	Nan	Nan
VAFYAF	1	1	noZ	noQ4	noWater	0	Neutral	0	1-Neutral	-26.56	Self-delta-pka	Nan	Nan
AKAJUR	1	1	noZ	noQ4	noWater	0	Neutral	0	1-Neutral	-26.55	Self-delta-pka	Nan	Nan
AKAKAY	1	1	noZ	noQ4	noWater	0	Neutral	0	1-Neutral	-26.55	Self-delta-pka	Nan	Nan
HIXXOD	1	1	noZ	noQ4	noWater	0	Neutral	0	1-Neutral	-26.55	Self-delta-pka	Nan	Nan
KUZRUT	1	1	noZ	noQ4	noWater	0	Neutral	0	1-Neutral	-26.55	Self-delta-pka	Nan	Nan
PAMHAM	1	1	noZ	noQ4	noWater	0	Neutral	0	1-Neutral	-26.55	Self-delta-pka	Nan	Nan
UTAKOR	1	1	noZ	noQ4	noWater	0	Neutral	0	1-Neutral	-26.55	Self-delta-pka	Nan	Nan
VESFEF	1	1	noZ	noQ4	noWater	0	Neutral	0	1-Neutral	-26.55	Self-delta-pka	Nan	Nan
MANTDO	1	1	noZ	noQ4	noWater	0	Neutral	0	1-Neutral	-26.55	Self-delta-pka	Nan	Nan
WIDJOI	1	1	noZ	noQ4	noWater	0	Neutral	0	1-Neutral	-26.55	Self-delta-pka	Nan	Nan
AKAKEC	1	1	noZ	noQ4	noWater	0	Neutral	0	1-Neutral	-26.54	Self-delta-pka	Nan	Nan
FACSEJ	1	1	noZ	noQ4	noWater	0	Neutral	0	1-Neutral	-26.54	Self-delta-pka	Nan	Nan
ICAXAL	1	1	noZ	noQ4	noWater	0	Neutral	0	1-Neutral	-26.54	Self-delta-pka	Nan	Nan
KOMBAS	1	1	noZ	noQ4	noWater	0	Neutral	0	1-Neutral	-26.54	Self-delta-pka	Nan	Nan
LEJSOK	1	1	noZ	noQ4	noWater	0	Neutral	0	1-Neutral	-26.54	Self-delta-pka	Nan	Nan
MISQOX	1	1	noZ	noQ4	noWater	0	Neutral	0	1-Neutral	-26.54	Self-delta-pka	Nan	Nan
NOYWAZ	1	1	noZ	noQ4	noWater	0	Neutral	0	1-Neutral	-26.54	Self-delta-pka	Nan	Nan
OCINUJ	1	1	noZ	noQ4	noWater	0	Neutral	0	1-Neutral	-26.54	Self-delta-pka	Nan	Nan
OCIPAR	1	1	noZ	noQ4	noWater	0	Neutral	0	1-Neutral	-26.54	Self-delta-pka	Nan	Nan
ODOPUS	1	1	noZ	noQ4	noWater	0	Neutral	0	1-Neutral	-26.54	Self-delta-pka	Nan	Nan
SIJLUS	1	1	noZ	noQ4	noWater	0	Neutral	0	1-Neutral	-26.54	Self-delta-pka	Nan	Nan
WUTVUE	1	1	noZ	noQ4	noWater	0	Neutral	0	1-Neutral	-26.54	Self-delta-pka	Nan	Nan
DINFAH01	1	1	noZ	noQ4	noWater	0	Neutral	0	1-Neutral	-26.53	Self-delta-pka	Nan	Nan
GEJGUX	1	1	noZ	noQ4	noWater	0	Neutral	0	1-Neutral	-26.53	Self-delta-pka	Nan	Nan
HEDMOT	1	1	noZ	noQ4	noWater	0	Neutral	0	1-Neutral	-26.53	Self-delta-pka	Nan	Nan
OCINOD	1	1	noZ	noQ4	noWater	0	Neutral	0	1-Neutral	-26.53	Self-delta-pka	Nan	Nan
AFIZAR	1	1	Zwit	Q4	noWater	0	Neutral	0	1-NeutralZQ4	-26.53	Self-delta-pka	Nan	Nan
CAKXUI	1	1	noZ	noQ4	noWater	0	Neutral	0	1-Neutral	-26.53	Self-delta-pka	Nan	Nan
VEXROF	1	1	noZ	noQ4	noWater	0	Neutral	0	1-Neutral	-26.52	Self-delta-pka	Nan	Nan
ATOZEP	1	1	noZ	noQ4	noWater	0	Neutral	0	1-Neutral	-26.52	Self-delta-pka	Nan	Nan
BUYJIP	1	1	noZ	noQ4	noWater	0	Neutral	0	1-Neutral	-26.52	Self-delta-pka	Nan	Nan
DOFTAV	1	1	noZ	noQ4	noWater	0	Neutral	0	1-Neutral	-26.52	Self-delta-pka	Nan	Nan
KARSIH	1	1	noZ	noQ4	noWater	0	Neutral	0	1-Neutral	-26.52	Self-delta-pka	Nan	Nan
MOBNIA	1	1	noZ	noQ4	noWater	0	Neutral	0	1-Neutral	-26.52	Self-delta-pka	Nan	Nan
NOZTUR	1	1	noZ	noQ4	noWater	0	Neutral	0	1-Neutral	-26.52	Self-delta-pka	Nan	Nan
NUFYIY	1	1	noZ	noQ4	noWater	0	Neutral	0	1-Neutral	-26.52	Self-delta-pka	Nan	Nan
TEBBUX	1	1	noZ	noQ4	noWater	0	Neutral	0	1-Neutral	-26.52	Self-delta-pka	Nan	Nan
WUVSEL	1	1	noZ	noQ4	noWater	0	Neutral	0	1-Neutral	-26.52	Self-delta-pka	Nan	Nan
WUVSIP	1	1	noZ	noQ4	noWater	0	Neutral	0	1-Neutral	-26.52	Self-delta-pka	Nan	Nan
ACATUW	1	1	noZ	noQ4	noWater	0	Neutral	0	1-Neutral	-26.51	Self-delta-pka	Nan	Nan
IWEHOJ	1	1	noZ	noQ4	noWater	0	Neutral	0	1-Neutral	-26.51	Self-delta-pka	Nan	Nan
LERLUS	1	1	noZ	noQ4	noWater	0	Neutral	0	1-Neutral	-26.51	Self-delta-pka	Nan	Nan
WETYOK	1	1	noZ	noQ4	noWater	0	Neutral	0	1-Neutral	-26.51	Self-delta-pka	Nan	Nan
BIFSOA	1	1	noZ	noQ4	noWater	0	Neutral	0	1-Neutral	-26.51	Self-delta-pka	Nan	Nan
BRCMPH10	1	1	noZ	noQ4	noWater	0	Neutral	0	1-Neutral	-26.51	Self-delta-pka	Nan	Nan
DEWDUE	1	1	noZ	noQ4	noWater	0	Neutral	0	1-Neutral	-26.51	Self-delta-pka	Nan	Nan
OXAVIT	1	1	noZ	noQ4	noWater	0	Neutral	0	1-Neutral	-26.51	Self-delta-pka	Nan	Nan
WEXNAQ	1	1	noZ	noQ4	noWater	0	Neutral	0	1-Neutral	-26.51	Self-delta-pka	Nan	Nan
BSCHOL	1	1	noZ	noQ4	noWater	0	Neutral	0	1-Neutral	-26.5	Self-delta-pka	Nan	Nan
CIPTAY	1	1	noZ	noQ4	noWater	0	Neutral	0	1-Neutral	-26.5	Self-delta-pka	Nan	Nan
EFEPEM	1	1	noZ	noQ4	noWater	0	Neutral	0	1-Neutral	-26.5	Self-delta-pka	Nan	Nan
EGIYIC	1	1	noZ	noQ4	noWater	0	Neutral	0	1-Neutral	-26.5	Self-delta-pka	Nan	Nan
EHULIC	1	1	noZ	noQ4	noWater	0	Neutral	0	1-Neutral	-26.5	Self-delta-pka	Nan	Nan
HETWOT	1	1	noZ	noQ4	noWater	0	Neutral	0	1-Neutral	-26.5	Self-delta-pka	Nan	Nan
KIWJIM	1	1	noZ	noQ4	noWater	0	Neutral	0	1-Neutral	-26.5	Self-delta-pka	Nan	Nan
SECHLS	1	1	noZ	noQ4	noWater	0	Neutral	0	1-Neutral	-26.5	Self-delta-pka	Nan	Nan
YITXAD	1	1	noZ	noQ4	noWater	0	Neutral	0	1-Neutral	-26.5	Self-delta-pka	Nan	Nan
ZOJDOR	1	1	noZ	noQ4	noWater	0	Neutral	0	1-Neutral	-26.5	Self-delta-pka	Nan	Nan
YIBGAR	1	1	noZ	noQ4	noWater	0	Neutral	0	1-Neutral	-26.5	Self-delta-pka	Nan	Nan
BCMXHP	1	1	noZ	noQ4	noWater	0	Neutral	0	1-Neutral	-26.49	Self-delta-pka	Nan	Nan
JATXIL	1	1	noZ	noQ4	noWater	0	Neutral	0	1-Neutral	-26.49	Self-delta-pka	Nan	Nan
LOVNIT	1	1	noZ	noQ4	noWater	0	Neutral	0	1-Neutral	-26.49	Self-delta-pka	Nan	Nan
TEKWEL	1	1	noZ	noQ4	noWater	0	Neutral	0	1-Neutral	-26.49	Self-delta-pka	Nan	Nan
SEFFEO	1	1	noZ	noQ4	noWater	0	Neutral	0	1-Neutral	-26.49	Self-delta-pka	Nan	Nan
TAWLIM	1	1	noZ	noQ4	noWater	0	Neutral	0	1-Neutral	-26.49	Self-delta-pka	Nan	Nan
XOYYAL	1	1	noZ	noQ4	noWater	0	Neutral	0	1-Neutral	-26.49	Self-delta-pka	Nan	Nan
BAQJEI	1	1	noZ	noQ4	noWater	0	Neutral	0	1-Neutral	-26.48	Self-delta-pka	Nan	Nan
BRDEOC	1	1	noZ	noQ4	noWater	0	Neutral	0	1-Neutral	-26.48	Self-delta-pka	Nan	Nan
CIGFUT	1	1	noZ	noQ4	noWater	0	Neutral	0	1-Neutral	-26.48	Self-delta-pka	Nan	Nan
IBIVAT	1	1	noZ	noQ4	noWater	0	Neutral	0	1-Neutral	-26.48	Self-delta-pka	Nan	Nan
REBHEL	1	1	noZ	noQ4	noWater	0	Neutral	0	1-Neutral	-26.48	Self-delta-pka	Nan	Nan
SOVCAH	1	1	noZ	noQ4	noWater	0	Neutral	0	1-Neutral	-26.48	Self-delta-pka	Nan	Nan
AJUBIR	1	1	Zwit	Q4	noWater	0	Neutral	0	1-NeutralZQ4	-26.48	Self-delta-pka	Nan	Nan
BMCHBX10	1	1	noZ	noQ4	noWater	0	Neutral	0	1-Neutral	-26.47	Self-delta-pka	Nan	Nan
ACSESO10	1	1	noZ	noQ4	noWater	0	Neutral	0	1-Neutral	-26.47	Self-delta-pka	Nan	Nan
FUMVAM	1	1	noZ	noQ4	noWater	0	Neutral	0	1-Neutral	-26.47	Self-delta-pka	Nan	Nan
JEJBIJ	1	1	noZ	noQ4	noWater	0	Neutral	0	1-Neutral	-26.47	Self-delta-pka	Nan	Nan
TIRCAA	1	1	noZ	noQ4	noWater	0	Neutral	0	1-Neutral	-26.47	Self-delta-pka	Nan	Nan
WINNEM	1	1	noZ	noQ4	noWater	0	Neutral	0	1-Neutral	-26.47	Self-delta-pka	Nan	Nan
WIYTAB	1	1	noZ	noQ4	noWater	0	Neutral	0	1-Neutral	-26.47	Self-delta-pka	Nan	Nan
XERJIN	1	1	noZ	noQ4	noWater	0	Neutral	0	1-Neutral	-26.47	Self-delta-pka	Nan	Nan
ZELFUU	1	1	noZ	noQ4	noWater	0	Neutral	0	1-Neutral	-26.47	Self-delta-pka	Nan	Nan
CIGKAE	1	1	noZ	noQ4	noWater	0	Neutral	0	1-Neutral	-26.46	Self-delta-pka	Nan	Nan
EBABER	1	1	noZ	noQ4	noWater	0	Neutral	0	1-Neutral	-26.46	Self-delta-pka	Nan	Nan
EZAKEW	1	1	noZ	noQ4	noWater	0	Neutral	0	1-Neutral	-26.46	Self-delta-pka	Nan	Nan
HIYFEA	1	1	noZ	noQ4	noWater	0	Neutral	0	1-Neutral	-26.46	Self-delta-pka	Nan	Nan
QIMXIT	1	1	noZ	noQ4	noWater	0	Neutral	0	1-Neutral	-26.46	Self-delta-pka	Nan	Nan
TIDBUG	1	1	noZ	noQ4	noWater	0	Neutral	0	1-Neutral	-26.46	Self-delta-pka	Nan	Nan
WOPHER	1	1	noZ	noQ4	noWater	0	Neutral	0	1-Neutral	-26.46	Self-delta-pka	Nan	Nan
DEWYIP	2	1	noZ	noQ4	noWater	1	Neutral	0	1-N_1-Solvate_	-26.46	Self-delta-pka	Nan	Nan
BIFYEV	1	1	noZ	noQ4	noWater	0	Neutral	0	1-Neutral	-26.45	Self-delta-pka	Nan	Nan
OXCPCY	1	1	noZ	noQ4	noWater	0	Neutral	0	1-Neutral	-26.45	Self-delta-pka	Nan	Nan
GIHYOO	1	1	noZ	noQ4	noWater	0	Neutral	0	1-Neutral	-26.45	Self-delta-pka	Nan	Nan
KOHJID	1	1	noZ	noQ4	noWater	0	Neutral	0	1-Neutral	-26.45	Self-delta-pka	Nan	Nan
AFIKIL	1	1	noZ	noQ4	noWater	0	Neutral	0	1-Neutral	-26.44	Self-delta-pka	Nan	Nan
CAMNUC	1	1	noZ	noQ4	noWater	0	Neutral	0	1-Neutral	-26.44	Self-delta-pka	Nan	Nan
LEBHIJ	1	1	noZ	noQ4	noWater	0	Neutral	0	1-Neutral	-26.44	Self-delta-pka	Nan	Nan
TCDODO	1	1	noZ	noQ4	noWater	0	Neutral	0	1-Neutral	-26.44	Self-delta-pka	Nan	Nan
HACNEH	1	1	noZ	noQ4	noWater	0	Neutral	0	1-Neutral	-26.44	Self-delta-pka	Nan	Nan
HIRJAV	1	1	noZ	noQ4	noWater	0	Neutral	0	1-Neutral	-26.43	Self-delta-pka	-27.87	Self-delta-pka
ANIBAC	1	1	noZ	noQ4	noWater	0	Neutral	0	1-Neutral	-26.43	Self-delta-pka	Nan	Nan
ANIBEG	1	1	noZ	noQ4	noWater	0	Neutral	0	1-Neutral	-26.43	Self-delta-pka	Nan	Nan
DIWPOO	1	1	noZ	noQ4	noWater	0	Neutral	0	1-Neutral	-26.43	Self-delta-pka	Nan	Nan
KACJON	1	1	noZ	noQ4	noWater	0	Neutral	0	1-Neutral	-26.43	Self-delta-pka	Nan	Nan
UWUYIW	1	1	noZ	noQ4	noWater	0	Neutral	0	1-Neutral	-26.43	Self-delta-pka	Nan	Nan
VEVTAS	1	1	noZ	noQ4	noWater	0	Neutral	0	1-Neutral	-26.43	Self-delta-pka	Nan	Nan
WOPHIV	1	1	noZ	noQ4	noWater	0	Neutral	0	1-Neutral	-26.43	Self-delta-pka	Nan	Nan
ADEVEL	1	1	noZ	noQ4	noWater	0	Neutral	0	1-Neutral	-26.42	Self-delta-pka	Nan	Nan
CIPQAV	1	1	noZ	noQ4	noWater	0	Neutral	0	1-Neutral	-26.42	Self-delta-pka	Nan	Nan
JAKQAN	1	1	noZ	noQ4	noWater	0	Neutral	0	1-Neutral	-26.42	Self-delta-pka	Nan	Nan
JAKQIV	1	1	noZ	noQ4	noWater	0	Neutral	0	1-Neutral	-26.42	Self-delta-pka	Nan	Nan
WIVSIG	1	1	noZ	noQ4	noWater	0	Neutral	0	1-Neutral	-26.42	Self-delta-pka	Nan	Nan
HARZOS	1	1	noZ	noQ4	noWater	0	Neutral	0	1-Neutral	-26.42	Self-delta-pka	Nan	Nan
VEXBEF	1	1	noZ	noQ4	noWater	0	Neutral	0	1-Neutral	-26.42	Self-delta-pka	Nan	Nan
BOTTIQ	1	1	noZ	noQ4	noWater	0	Neutral	0	1-Neutral	-26.41	Self-delta-pka	Nan	Nan
DERVAA	1	1	noZ	noQ4	noWater	0	Neutral	0	1-Neutral	-26.41	Self-delta-pka	Nan	Nan
EGORUP	1	1	noZ	noQ4	noWater	0	Neutral	0	1-Neutral	-26.41	Self-delta-pka	Nan	Nan
FAFWEO	1	1	noZ	noQ4	noWater	0	Neutral	0	1-Neutral	-26.41	Self-delta-pka	Nan	Nan
PABSER	1	1	noZ	noQ4	noWater	0	Neutral	0	1-Neutral	-26.41	Self-delta-pka	Nan	Nan
XASCOJ	1	1	noZ	noQ4	noWater	0	Neutral	0	1-Neutral	-26.41	Self-delta-pka	Nan	Nan
ZUXGEH	1	1	noZ	noQ4	noWater	0	Neutral	0	1-Neutral	-26.41	Self-delta-pka	Nan	Nan
FUFFOC	1	1	noZ	noQ4	noWater	0	Neutral	0	1-Neutral	-26.41	Self-delta-pka	Nan	Nan
BXCEAO	1	1	noZ	noQ4	noWater	0	Neutral	0	1-Neutral	-26.4	Self-delta-pka	Nan	Nan
IZUTOO	1	1	noZ	noQ4	noWater	0	Neutral	0	1-Neutral	-26.4	Self-delta-pka	Nan	Nan
BUXWIC	1	1	noZ	noQ4	noWater	0	Neutral	0	1-Neutral	-26.4	Self-delta-pka	Nan	Nan
EGADOG	1	1	noZ	noQ4	noWater	0	Neutral	0	1-Neutral	-26.4	Self-delta-pka	Nan	Nan
EHAJUT	1	1	noZ	noQ4	noWater	0	Neutral	0	1-Neutral	-26.4	Self-delta-pka	Nan	Nan
MXRCDC	1	1	noZ	noQ4	noWater	0	Neutral	0	1-Neutral	-26.4	Self-delta-pka	Nan	Nan
TUZTAM	1	1	noZ	noQ4	noWater	0	Neutral	0	1-Neutral	-26.39	Self-delta-pka	Nan	Nan
WAKVEN	1	1	noZ	noQ4	noWater	0	Neutral	0	1-Neutral	-26.39	Self-delta-pka	Nan	Nan
CEWSEC10	1	1	noZ	noQ4	noWater	0	Neutral	0	1-Neutral	-26.39	Self-delta-pka	Nan	Nan
PIWCON	1	1	noZ	noQ4	noWater	0	Neutral	0	1-Neutral	-26.39	Self-delta-pka	Nan	Nan
NOPQAN	1	1	noZ	noQ4	noWater	0	Neutral	0	1-Neutral	-26.38	Self-delta-pka	Nan	Nan
HEBZOD	1	1	noZ	noQ4	noWater	0	Neutral	0	1-Neutral	-26.38	Self-delta-pka	Nan	Nan
TEJGEU	1	1	noZ	noQ4	noWater	0	Neutral	0	1-Neutral	-26.38	Self-delta-pka	Nan	Nan
VUFHIP	1	1	noZ	noQ4	noWater	0	Neutral	0	1-Neutral	-26.38	Self-delta-pka	Nan	Nan
YITKAP	1	1	noZ	noQ4	noWater	0	Neutral	0	1-Neutral	-26.38	Self-delta-pka	Nan	Nan
IKUBOI	1	1	noZ	noQ4	noWater	0	Neutral	0	1-Neutral	-26.37	Self-delta-pka	Nan	Nan
FEZLAY	1	1	noZ	noQ4	noWater	0	Neutral	0	1-Neutral	-26.37	Self-delta-pka	Nan	Nan
KIMBOX	1	1	noZ	noQ4	noWater	0	Neutral	0	1-Neutral	-26.37	Self-delta-pka	Nan	Nan
QINYUK	1	1	noZ	noQ4	noWater	0	Neutral	0	1-Neutral	-26.37	Self-delta-pka	Nan	Nan
ROTSAW	1	1	noZ	noQ4	noWater	0	Neutral	0	1-Neutral	-26.37	Self-delta-pka	Nan	Nan
RUWMOL	1	1	noZ	noQ4	noWater	0	Neutral	0	1-Neutral	-26.37	Self-delta-pka	Nan	Nan
AGIWUK	1	1	noZ	noQ4	noWater	0	Neutral	0	1-Neutral	-26.37	Self-delta-pka	Nan	Nan
ALEJAD	1	1	noZ	noQ4	noWater	0	Neutral	0	1-Neutral	-26.37	Self-delta-pka	Nan	Nan
KEBMUC	1	1	noZ	noQ4	noWater	0	Neutral	0	1-Neutral	-26.37	Self-delta-pka	Nan	Nan
JAGJAG	1	1	noZ	noQ4	noWater	0	Neutral	0	1-Neutral	-26.36	Self-delta-pka	Nan	Nan
ASOKOJ	1	1	noZ	noQ4	noWater	0	Neutral	0	1-Neutral	-26.36	Self-delta-pka	Nan	Nan
AXCANO	1	1	noZ	noQ4	noWater	0	Neutral	0	1-Neutral	-26.36	Self-delta-pka	Nan	Nan
EHUXUA	1	1	noZ	noQ4	noWater	0	Neutral	0	1-Neutral	-26.36	Self-delta-pka	Nan	Nan
GIDFUV	1	1	noZ	noQ4	noWater	0	Neutral	0	1-Neutral	-26.36	Self-delta-pka	Nan	Nan
NASDET	1	1	noZ	noQ4	noWater	0	Neutral	0	1-Neutral	-26.36	Self-delta-pka	Nan	Nan
MUYQIH	1	1	Zwit	Q4	noWater	0	Neutral	0	1-NeutralZQ4	-26.36	Self-delta-pka	Nan	Nan
ALEJIL	1	1	noZ	noQ4	noWater	0	Neutral	0	1-Neutral	-26.35	Self-delta-pka	Nan	Nan
FONMIH	1	1	noZ	noQ4	noWater	0	Neutral	0	1-Neutral	-26.35	Self-delta-pka	Nan	Nan
OMIVAH	1	1	noZ	noQ4	noWater	0	Neutral	0	1-Neutral	-26.35	Self-delta-pka	Nan	Nan
XODJEI	1	1	noZ	noQ4	noWater	0	Neutral	0	1-Neutral	-26.35	Self-delta-pka	Nan	Nan
MAPPUQ	1	1	noZ	noQ4	noWater	0	Neutral	0	1-Neutral	-26.35	Self-delta-pka	Nan	Nan
HABZOZ	1	1	noZ	noQ4	noWater	0	Neutral	0	1-Neutral	-26.34	Self-delta-pka	-27.99	Self-delta-pka
HABZUF	1	1	noZ	noQ4	noWater	0	Neutral	0	1-Neutral	-26.34	Self-delta-pka	-27.99	Self-delta-pka
HOPNUW	1	1	noZ	noQ4	noWater	0	Neutral	0	1-Neutral	-26.34	Self-delta-pka	Nan	Nan
IFOVOR	1	1	noZ	noQ4	noWater	0	Neutral	0	1-Neutral	-26.34	Self-delta-pka	Nan	Nan
JAWBIT	1	1	noZ	noQ4	noWater	0	Neutral	0	1-Neutral	-26.34	Self-delta-pka	Nan	Nan
MISVEQ	1	1	noZ	noQ4	noWater	0	Neutral	0	1-Neutral	-26.34	Self-delta-pka	Nan	Nan
XOBXOE	1	1	noZ	noQ4	noWater	0	Neutral	0	1-Neutral	-26.34	Self-delta-pka	Nan	Nan
SOVBUA	1	1	noZ	noQ4	noWater	0	Neutral	0	1-Neutral	-26.33	Self-delta-pka	Nan	Nan
EPCDBK	1	1	noZ	noQ4	noWater	0	Neutral	0	1-Neutral	-26.33	Self-delta-pka	Nan	Nan
ETBCAM	1	1	noZ	noQ4	noWater	0	Neutral	0	1-Neutral	-26.33	Self-delta-pka	Nan	Nan
HUJSEK	1	1	noZ	noQ4	noWater	0	Neutral	0	1-Neutral	-26.33	Self-delta-pka	Nan	Nan
NONBOI	1	1	noZ	noQ4	noWater	0	Neutral	0	1-Neutral	-26.33	Self-delta-pka	Nan	Nan
VOYMAX	1	1	noZ	noQ4	noWater	0	Neutral	0	1-Neutral	-26.33	Self-delta-pka	Nan	Nan
TUZTEQ	1	1	noZ	noQ4	noWater	0	Neutral	0	1-Neutral	-26.32	Self-delta-pka	Nan	Nan
ALEHUV	1	1	noZ	noQ4	noWater	0	Neutral	0	1-Neutral	-26.32	Self-delta-pka	Nan	Nan
DAHDIC	1	1	noZ	noQ4	noWater	0	Neutral	0	1-Neutral	-26.32	Self-delta-pka	Nan	Nan
EDAVAG	1	1	noZ	noQ4	noWater	0	Neutral	0	1-Neutral	-26.32	Self-delta-pka	Nan	Nan
JAKQER	1	1	noZ	noQ4	noWater	0	Neutral	0	1-Neutral	-26.32	Self-delta-pka	Nan	Nan
JASTEC	1	1	noZ	noQ4	noWater	0	Neutral	0	1-Neutral	-26.32	Self-delta-pka	Nan	Nan
LAQXEJ	1	1	noZ	noQ4	noWater	0	Neutral	0	1-Neutral	-26.32	Self-delta-pka	Nan	Nan
LEMYIO	1	1	noZ	noQ4	noWater	0	Neutral	0	1-Neutral	-26.32	Self-delta-pka	Nan	Nan
LEPMUR	1	1	noZ	noQ4	noWater	0	Neutral	0	1-Neutral	-26.32	Self-delta-pka	Nan	Nan
LULHIJ	1	1	noZ	noQ4	noWater	0	Neutral	0	1-Neutral	-26.32	Self-delta-pka	Nan	Nan
QETBEZ	1	1	noZ	noQ4	noWater	0	Neutral	0	1-Neutral	-26.32	Self-delta-pka	Nan	Nan
SIRBOK	1	1	noZ	noQ4	noWater	0	Neutral	0	1-Neutral	-26.32	Self-delta-pka	Nan	Nan
VOLJAI	1	1	noZ	noQ4	noWater	0	Neutral	0	1-Neutral	-26.32	Self-delta-pka	Nan	Nan
XURXUD	1	1	noZ	noQ4	noWater	0	Neutral	0	1-Neutral	-26.32	Self-delta-pka	Nan	Nan
XASCEZ	1	1	noZ	noQ4	noWater	0	Neutral	0	1-Neutral	-26.32	Self-delta-pka	Nan	Nan
WESNOX	2	1	noZ	noQ4	noWater	1	Neutral	0	1-N_1-Solvate_	-26.32	Self-delta-pka	Nan	Nan
GIDGAC	1	1	noZ	noQ4	noWater	0	Neutral	0	1-Neutral	-26.31	Self-delta-pka	Nan	Nan
TEHHOD	1	1	noZ	noQ4	noWater	0	Neutral	0	1-Neutral	-26.31	Self-delta-pka	Nan	Nan
TEHHUJ	1	1	noZ	noQ4	noWater	0	Neutral	0	1-Neutral	-26.31	Self-delta-pka	Nan	Nan
WIKSUE	1	1	noZ	noQ4	noWater	0	Neutral	0	1-Neutral	-26.31	Self-delta-pka	Nan	Nan
VARNIN	1	1	noZ	noQ4	noWater	0	Neutral	0	1-Neutral	-26.31	Self-delta-pka	Nan	Nan
JUVXUT	1	1	noZ	noQ4	noWater	0	Neutral	0	1-Neutral	-26.3	Self-delta-pka	-27.41	Self-delta-pka
FACXAK	1	1	noZ	noQ4	noWater	0	Neutral	0	1-Neutral	-26.3	Self-delta-pka	Nan	Nan
HOKSIM	1	1	noZ	noQ4	noWater	0	Neutral	0	1-Neutral	-26.3	Self-delta-pka	Nan	Nan
MXTHPO	1	1	noZ	noQ4	noWater	0	Neutral	0	1-Neutral	-26.3	Self-delta-pka	Nan	Nan
ALEJOR	1	1	noZ	noQ4	noWater	0	Neutral	0	1-Neutral	-26.3	Self-delta-pka	Nan	Nan
FEKDEE	1	1	noZ	noQ4	noWater	0	Neutral	0	1-Neutral	-26.3	Self-delta-pka	Nan	Nan
BUYHUZ	1	1	noZ	noQ4	noWater	0	Neutral	0	1-Neutral	-26.29	Self-delta-pka	Nan	Nan
BUYHUZ01	1	1	noZ	noQ4	noWater	0	Neutral	0	1-Neutral	-26.29	Self-delta-pka	Nan	Nan
EABZEM	1	1	noZ	noQ4	noWater	0	Neutral	0	1-Neutral	-26.29	Self-delta-pka	Nan	Nan
IFAKUX	1	1	noZ	noQ4	noWater	0	Neutral	0	1-Neutral	-26.29	Self-delta-pka	Nan	Nan
IVACIT	1	1	noZ	noQ4	noWater	0	Neutral	0	1-Neutral	-26.29	Self-delta-pka	Nan	Nan
JIQXIT	1	1	noZ	noQ4	noWater	0	Neutral	0	1-Neutral	-26.29	Self-delta-pka	Nan	Nan
RUHBIF	1	1	noZ	noQ4	noWater	0	Neutral	0	1-Neutral	-26.29	Self-delta-pka	Nan	Nan
CAWCUY	1	1	noZ	noQ4	noWater	0	Neutral	0	1-Neutral	-26.28	Self-delta-pka	Nan	Nan
QOPKUB	1	1	noZ	noQ4	noWater	0	Neutral	0	1-Neutral	-26.28	Self-delta-pka	Nan	Nan
RASWEN	1	1	noZ	noQ4	noWater	0	Neutral	0	1-Neutral	-26.28	Self-delta-pka	Nan	Nan
SEDROK	1	1	noZ	noQ4	noWater	0	Neutral	0	1-Neutral	-26.28	Self-delta-pka	Nan	Nan
VAQXER	1	1	noZ	noQ4	noWater	0	Neutral	0	1-Neutral	-26.28	Self-delta-pka	Nan	Nan
ZOXNUV	1	1	noZ	noQ4	noWater	0	Neutral	0	1-Neutral	-26.28	Self-delta-pka	Nan	Nan
INUHII	1	1	noZ	noQ4	noWater	0	Neutral	0	1-Neutral	-26.28	Self-delta-pka	Nan	Nan
VARNOT	2	1	noZ	noQ4	noWater	1	Neutral	0	1-N_1-Solvate_	-26.28	Self-delta-pka	Nan	Nan
BAPCUT	1	1	noZ	noQ4	noWater	0	Neutral	0	1-Neutral	-26.27	Self-delta-pka	Nan	Nan
BUWSAO	1	1	noZ	noQ4	noWater	0	Neutral	0	1-Neutral	-26.27	Self-delta-pka	Nan	Nan
VAMPII	1	1	noZ	noQ4	noWater	0	Neutral	0	1-Neutral	-26.27	Self-delta-pka	Nan	Nan
WOHXUO	1	1	noZ	noQ4	noWater	0	Neutral	0	1-Neutral	-26.27	Self-delta-pka	Nan	Nan
BCTCDO	1	1	noZ	noQ4	noWater	0	Neutral	0	1-Neutral	-26.27	Self-delta-pka	-27.86	Self-delta-pka
RASWAJ	1	1	noZ	noQ4	noWater	0	Neutral	0	1-Neutral	-26.27	Self-delta-pka	Nan	Nan
XEKWER	1	1	noZ	noQ4	noWater	0	Neutral	0	1-Neutral	-26.27	Self-delta-pka	Nan	Nan
XAQNEJ	1	1	noZ	noQ4	noWater	0	Neutral	0	1-Neutral	-26.27	Self-delta-pka	Nan	Nan
BAQQOC	1	1	noZ	noQ4	noWater	0	Neutral	0	1-Neutral	-26.26	Self-delta-pka	Nan	Nan
SELZEP	1	1	noZ	noQ4	noWater	0	Neutral	0	1-Neutral	-26.26	Self-delta-pka	Nan	Nan
BTCYDO	1	1	noZ	noQ4	noWater	0	Neutral	0	1-Neutral	-26.26	Self-delta-pka	Nan	Nan
DBCYOC	1	1	noZ	noQ4	noWater	0	Neutral	0	1-Neutral	-26.26	Self-delta-pka	Nan	Nan
VAKBAK	1	1	noZ	noQ4	noWater	0	Neutral	0	1-Neutral	-26.26	Self-delta-pka	Nan	Nan
WIKJUV	1	1	noZ	noQ4	noWater	0	Neutral	0	1-Neutral	-26.26	Self-delta-pka	Nan	Nan
AHEDEX	1	1	noZ	noQ4	noWater	0	Neutral	0	1-Neutral	-26.25	Self-delta-pka	Nan	Nan
BASBOP	1	1	noZ	noQ4	noWater	0	Neutral	0	1-Neutral	-26.25	Self-delta-pka	Nan	Nan
DEZVOT	1	1	noZ	noQ4	noWater	0	Neutral	0	1-Neutral	-26.25	Self-delta-pka	Nan	Nan
FUDKUM	1	1	noZ	noQ4	noWater	0	Neutral	0	1-Neutral	-26.25	Self-delta-pka	Nan	Nan
TCDEOC	1	1	noZ	noQ4	noWater	0	Neutral	0	1-Neutral	-26.25	Self-delta-pka	Nan	Nan
TUTYUC	1	1	noZ	noQ4	noWater	0	Neutral	0	1-Neutral	-26.25	Self-delta-pka	Nan	Nan
GENFIO	1	1	noZ	noQ4	noWater	0	Neutral	0	1-Neutral	-26.24	Self-delta-pka	Nan	Nan
HULCAT	1	1	noZ	noQ4	noWater	0	Neutral	0	1-Neutral	-26.24	Self-delta-pka	Nan	Nan
IRONAG	1	1	noZ	noQ4	noWater	0	Neutral	0	1-Neutral	-26.24	Self-delta-pka	Nan	Nan
IVEMUS01	1	1	noZ	noQ4	noWater	0	Neutral	0	1-Neutral	-26.24	Self-delta-pka	Nan	Nan
JIXCEY	1	1	noZ	noQ4	noWater	0	Neutral	0	1-Neutral	-26.24	Self-delta-pka	Nan	Nan
NETDIA	1	1	noZ	noQ4	noWater	0	Neutral	0	1-Neutral	-26.24	Self-delta-pka	Nan	Nan
QOCDAQ	1	1	noZ	noQ4	noWater	0	Neutral	0	1-Neutral	-26.24	Self-delta-pka	Nan	Nan
TUNNAS	1	1	noZ	noQ4	noWater	0	Neutral	0	1-Neutral	-26.24	Self-delta-pka	Nan	Nan
AKUSUV	1	1	noZ	noQ4	noWater	0	Neutral	0	1-Neutral	-26.24	Self-delta-pka	Nan	Nan
OLAJAM	1	1	noZ	noQ4	noWater	0	Neutral	0	1-Neutral	-26.24	Self-delta-pka	Nan	Nan
PEJNIB	1	1	noZ	noQ4	noWater	0	Neutral	0	1-Neutral	-26.24	Self-delta-pka	Nan	Nan
POWPAS	1	1	noZ	noQ4	noWater	0	Neutral	0	1-Neutral	-26.24	Self-delta-pka	Nan	Nan
UCIDOC	1	1	noZ	noQ4	noWater	0	Neutral	0	1-Neutral	-26.24	Self-delta-pka	Nan	Nan
NOHSAG	1	1	Zwit	Q4	noWater	0	Neutral	0	1-NeutralZQ4	-26.24	Self-delta-pka	Nan	Nan
DIZWOY	1	1	noZ	noQ4	noWater	0	Neutral	0	1-Neutral	-26.23	Self-delta-pka	-27.49	Self-delta-pka
SAQHIB	1	1	noZ	noQ4	noWater	0	Neutral	0	1-Neutral	-26.23	Self-delta-pka	-27.44	Self-delta-pka
KUYCAI	1	1	noZ	noQ4	noWater	0	Neutral	0	1-Neutral	-26.23	Self-delta-pka	Nan	Nan
MIGMUN	1	1	noZ	noQ4	noWater	0	Neutral	0	1-Neutral	-26.23	Self-delta-pka	Nan	Nan
PERROU	1	1	noZ	noQ4	noWater	0	Neutral	0	1-Neutral	-26.23	Self-delta-pka	Nan	Nan
POKZEU	1	1	noZ	noQ4	noWater	0	Neutral	0	1-Neutral	-26.23	Self-delta-pka	Nan	Nan
TEFWEI	1	1	noZ	noQ4	noWater	0	Neutral	0	1-Neutral	-26.23	Self-delta-pka	Nan	Nan
YONSOJ	1	1	noZ	noQ4	noWater	0	Neutral	0	1-Neutral	-26.23	Self-delta-pka	Nan	Nan
ATOYEN	1	1	noZ	noQ4	noWater	0	Neutral	0	1-Neutral	-26.22	Self-delta-pka	Nan	Nan
PEZYOL	1	1	noZ	noQ4	noWater	0	Neutral	0	1-Neutral	-26.22	Self-delta-pka	Nan	Nan
BONSEE	1	1	noZ	noQ4	noWater	0	Neutral	0	1-Neutral	-26.22	Self-delta-pka	Nan	Nan
BUYJAH	1	1	noZ	noQ4	noWater	0	Neutral	0	1-Neutral	-26.22	Self-delta-pka	Nan	Nan
BUYJAH02	1	1	noZ	noQ4	noWater	0	Neutral	0	1-Neutral	-26.22	Self-delta-pka	Nan	Nan
CEGVUI	1	1	noZ	noQ4	noWater	0	Neutral	0	1-Neutral	-26.22	Self-delta-pka	Nan	Nan
CIJGOR	1	1	noZ	noQ4	noWater	0	Neutral	0	1-Neutral	-26.22	Self-delta-pka	Nan	Nan
DASHIR	1	1	noZ	noQ4	noWater	0	Neutral	0	1-Neutral	-26.22	Self-delta-pka	Nan	Nan
HEWMUU	1	1	noZ	noQ4	noWater	0	Neutral	0	1-Neutral	-26.22	Self-delta-pka	Nan	Nan
MAXPRG10	1	1	noZ	noQ4	noWater	0	Neutral	0	1-Neutral	-26.22	Self-delta-pka	Nan	Nan
NAPLUM	1	1	noZ	noQ4	noWater	0	Neutral	0	1-Neutral	-26.22	Self-delta-pka	Nan	Nan
UQEKEI	1	1	noZ	noQ4	noWater	0	Neutral	0	1-Neutral	-26.22	Self-delta-pka	Nan	Nan
VIZHOC	1	1	noZ	noQ4	noWater	0	Neutral	0	1-Neutral	-26.21	Self-delta-pka	-27.42	Self-delta-pka
FEHCIE	1	1	noZ	noQ4	noWater	0	Neutral	0	1-Neutral	-26.21	Self-delta-pka	Nan	Nan
HEQHIX	1	1	noZ	noQ4	noWater	0	Neutral	0	1-Neutral	-26.21	Self-delta-pka	Nan	Nan
OGIPOL	1	1	noZ	noQ4	noWater	0	Neutral	0	1-Neutral	-26.21	Self-delta-pka	Nan	Nan
QIFHES	1	1	noZ	noQ4	noWater	0	Neutral	0	1-Neutral	-26.21	Self-delta-pka	Nan	Nan
XEGPEG	1	1	noZ	noQ4	noWater	0	Neutral	0	1-Neutral	-26.21	Self-delta-pka	Nan	Nan
GIVHUP	1	1	noZ	noQ4	noWater	0	Neutral	0	1-Neutral	-26.21	Self-delta-pka	Nan	Nan
WIVXAD	1	1	noZ	noQ4	noWater	0	Neutral	0	1-Neutral	-26.21	Self-delta-pka	Nan	Nan
ELOLEY	1	1	noZ	noQ4	noWater	0	Neutral	0	1-Neutral	-26.2	Self-delta-pka	Nan	Nan
TACTAS	1	1	noZ	noQ4	noWater	0	Neutral	0	1-Neutral	-26.2	Self-delta-pka	Nan	Nan
VECFAL	1	1	noZ	noQ4	noWater	0	Neutral	0	1-Neutral	-26.2	Self-delta-pka	Nan	Nan
BOKJIW	1	1	noZ	noQ4	noWater	0	Neutral	0	1-Neutral	-26.2	Self-delta-pka	Nan	Nan
CUFYAD	1	1	noZ	noQ4	noWater	0	Neutral	0	1-Neutral	-26.2	Self-delta-pka	Nan	Nan
DMNPPO	1	1	noZ	noQ4	noWater	0	Neutral	0	1-Neutral	-26.2	Self-delta-pka	Nan	Nan
HIXVEP	1	1	noZ	noQ4	noWater	0	Neutral	0	1-Neutral	-26.19	Self-delta-pka	Nan	Nan
GAWGES	1	1	noZ	noQ4	noWater	0	Neutral	0	1-Neutral	-26.18	Self-delta-pka	Nan	Nan
GEMYUS	1	1	noZ	noQ4	noWater	0	Neutral	0	1-Neutral	-26.18	Self-delta-pka	Nan	Nan
HAVXUA	1	1	noZ	noQ4	noWater	0	Neutral	0	1-Neutral	-26.18	Self-delta-pka	Nan	Nan
HINJIZ	1	1	noZ	noQ4	noWater	0	Neutral	0	1-Neutral	-26.18	Self-delta-pka	Nan	Nan
LITYUK	1	1	noZ	noQ4	noWater	0	Neutral	0	1-Neutral	-26.18	Self-delta-pka	Nan	Nan
NEWLOQ	1	1	noZ	noQ4	noWater	0	Neutral	0	1-Neutral	-26.18	Self-delta-pka	Nan	Nan
REXMEO	1	1	noZ	noQ4	noWater	0	Neutral	0	1-Neutral	-26.18	Self-delta-pka	Nan	Nan
ROCKIG	1	1	noZ	noQ4	noWater	0	Neutral	0	1-Neutral	-26.18	Self-delta-pka	Nan	Nan
TUTXAH	1	1	noZ	noQ4	noWater	0	Neutral	0	1-Neutral	-26.18	Self-delta-pka	Nan	Nan
UZAXIE	1	1	noZ	noQ4	noWater	0	Neutral	0	1-Neutral	-26.18	Self-delta-pka	Nan	Nan
YIBLED	1	1	noZ	noQ4	noWater	0	Neutral	0	1-Neutral	-26.18	Self-delta-pka	Nan	Nan
YIBLED01	1	1	noZ	noQ4	noWater	0	Neutral	0	1-Neutral	-26.18	Self-delta-pka	Nan	Nan
YIQSIC	1	1	noZ	noQ4	noWater	0	Neutral	0	1-Neutral	-26.18	Self-delta-pka	Nan	Nan
WARWUJ	1	1	noZ	noQ4	noWater	0	Neutral	0	1-Neutral	-26.17	Self-delta-pka	Nan	Nan
NIJJAS	1	1	noZ	noQ4	noWater	0	Neutral	0	1-Neutral	-26.17	Self-delta-pka	-27.37	Self-delta-pka
UDIXOW	1	1	noZ	noQ4	noWater	0	Neutral	0	1-Neutral	-26.17	Self-delta-pka	Nan	Nan
WASDEB	1	1	noZ	noQ4	noWater	0	Neutral	0	1-Neutral	-26.17	Self-delta-pka	Nan	Nan
ZIHNEJ	1	1	noZ	noQ4	noWater	0	Neutral	0	1-Neutral	-26.17	Self-delta-pka	Nan	Nan
CUHTEE10	1	1	noZ	noQ4	noWater	0	Neutral	0	1-Neutral	-26.16	Self-delta-pka	Nan	Nan
PIRFUT	1	1	noZ	noQ4	noWater	0	Neutral	0	1-Neutral	-26.16	Self-delta-pka	Nan	Nan
KEMYIK	2	2	noZ	noQ4	noWater	0	Neutral	0	2-N_	-26.16	Self-delta-pka	-26.16	Self-delta-pka
LAPHAL	1	1	noZ	noQ4	noWater	0	Neutral	0	1-Neutral	-26.15	Self-delta-pka	Nan	Nan
SOCYOB	1	1	noZ	noQ4	noWater	0	Neutral	0	1-Neutral	-26.15	Self-delta-pka	Nan	Nan
IBZCAC10	1	1	noZ	noQ4	noWater	0	Neutral	0	1-Neutral	-26.15	Self-delta-pka	-27.38	Self-delta-pka
IDODAG	1	1	noZ	noQ4	noWater	0	Neutral	0	1-Neutral	-26.15	Self-delta-pka	Nan	Nan
IFOFUH	1	1	noZ	noQ4	noWater	0	Neutral	0	1-Neutral	-26.15	Self-delta-pka	Nan	Nan
OTACHN	1	1	noZ	noQ4	noWater	0	Neutral	0	1-Neutral	-26.15	Self-delta-pka	Nan	Nan
WULGAL01	1	1	noZ	noQ4	noWater	0	Neutral	0	1-Neutral	-26.15	Self-delta-pka	Nan	Nan
KEMNIZ	1	1	noZ	noQ4	noWater	0	Neutral	0	1-Neutral	-26.14	Self-delta-pka	-27.64	Self-delta-pka
ZIRTEC	1	1	noZ	noQ4	noWater	0	Neutral	0	1-Neutral	-26.14	Self-delta-pka	-27.64	Self-delta-pka
DOTNEF	1	1	noZ	noQ4	noWater	0	Neutral	0	1-Neutral	-26.14	Self-delta-pka	Nan	Nan
GADRAF	1	1	noZ	noQ4	noWater	0	Neutral	0	1-Neutral	-26.14	Self-delta-pka	Nan	Nan
GODZUW	1	1	noZ	noQ4	noWater	0	Neutral	0	1-Neutral	-26.14	Self-delta-pka	Nan	Nan
ENELAL	2	1	noZ	noQ4	noWater	1	Neutral	0	1-N_1-Solvate_	-26.14	Self-delta-pka	Nan	Nan
FICKEK	1	1	noZ	noQ4	noWater	0	Neutral	0	1-Neutral	-26.13	Self-delta-pka	Nan	Nan
FICKIO	1	1	noZ	noQ4	noWater	0	Neutral	0	1-Neutral	-26.13	Self-delta-pka	Nan	Nan
FORRUB	1	1	noZ	noQ4	noWater	0	Neutral	0	1-Neutral	-26.13	Self-delta-pka	Nan	Nan
HANTUN	1	1	noZ	noQ4	noWater	0	Neutral	0	1-Neutral	-26.13	Self-delta-pka	Nan	Nan
MUSMUI	1	1	noZ	noQ4	noWater	0	Neutral	0	1-Neutral	-26.13	Self-delta-pka	-27.39	Self-delta-pka
VIGHUP	1	1	noZ	noQ4	noWater	0	Neutral	0	1-Neutral	-26.13	Self-delta-pka	-27.24	Self-delta-pka
GEKQAO	1	1	noZ	noQ4	noWater	0	Neutral	0	1-Neutral	-26.13	Self-delta-pka	Nan	Nan
HADTIP	1	1	noZ	noQ4	noWater	0	Neutral	0	1-Neutral	-26.13	Self-delta-pka	Nan	Nan
RARDOF	1	1	noZ	noQ4	noWater	0	Neutral	0	1-Neutral	-26.13	Self-delta-pka	Nan	Nan
TOKQOC	1	1	noZ	noQ4	noWater	0	Neutral	0	1-Neutral	-26.13	Self-delta-pka	Nan	Nan
BRDECO	1	1	noZ	noQ4	noWater	0	Neutral	0	1-Neutral	-26.12	Self-delta-pka	Nan	Nan
IDUSOP	1	1	noZ	noQ4	noWater	0	Neutral	0	1-Neutral	-26.12	Self-delta-pka	Nan	Nan
MCMDOD	1	1	noZ	noQ4	noWater	0	Neutral	0	1-Neutral	-26.12	Self-delta-pka	Nan	Nan
FICKOU	1	1	noZ	noQ4	noWater	0	Neutral	0	1-Neutral	-26.12	Self-delta-pka	Nan	Nan
PALMEX	1	1	noZ	noQ4	noWater	0	Neutral	0	1-Neutral	-26.12	Self-delta-pka	Nan	Nan
UYUGAX	1	1	noZ	noQ4	noWater	0	Neutral	0	1-Neutral	-26.12	Self-delta-pka	Nan	Nan
YIQSEY	1	1	noZ	noQ4	noWater	0	Neutral	0	1-Neutral	-26.12	Self-delta-pka	Nan	Nan
BMHINO	1	1	noZ	noQ4	noWater	0	Neutral	0	1-Neutral	-26.11	Self-delta-pka	Nan	Nan
CUMROR	1	1	noZ	noQ4	noWater	0	Neutral	0	1-Neutral	-26.11	Self-delta-pka	Nan	Nan
EDAZOA	1	1	noZ	noQ4	noWater	0	Neutral	0	1-Neutral	-26.11	Self-delta-pka	Nan	Nan
HIXVAL	1	1	noZ	noQ4	noWater	0	Neutral	0	1-Neutral	-26.11	Self-delta-pka	Nan	Nan
IHAFON	1	1	noZ	noQ4	noWater	0	Neutral	0	1-Neutral	-26.11	Self-delta-pka	Nan	Nan
NOPQIV	1	1	noZ	noQ4	noWater	0	Neutral	0	1-Neutral	-26.11	Self-delta-pka	Nan	Nan
QUKMIS	1	1	noZ	noQ4	noWater	0	Neutral	0	1-Neutral	-26.11	Self-delta-pka	Nan	Nan
WEDMOH	1	1	noZ	noQ4	noWater	0	Neutral	0	1-Neutral	-26.1	Self-delta-pka	-27.33	Self-delta-pka
BRDECC	1	1	noZ	noQ4	noWater	0	Neutral	0	1-Neutral	-26.1	Self-delta-pka	Nan	Nan
DANNAH	1	1	noZ	noQ4	noWater	0	Neutral	0	1-Neutral	-26.1	Self-delta-pka	Nan	Nan
KEFJAI	1	1	noZ	noQ4	noWater	0	Neutral	0	1-Neutral	-26.1	Self-delta-pka	Nan	Nan
SOTGUE	1	1	noZ	noQ4	noWater	0	Neutral	0	1-Neutral	-26.1	Self-delta-pka	Nan	Nan
VATKAC	2	1	noZ	noQ4	noWater	1	Neutral	0	1-N_1-Solvate_	-26.1	Self-delta-pka	Nan	Nan
KEPBEN	1	1	noZ	noQ4	noWater	0	Neutral	0	1-Neutral	-26.1	Self-delta-pka	-27.31	Self-delta-pka
AHEBOF	1	1	noZ	noQ4	noWater	0	Neutral	0	1-Neutral	-26.1	Self-delta-pka	Nan	Nan
PINCIA	1	1	noZ	noQ4	noWater	0	Neutral	0	1-Neutral	-26.1	Self-delta-pka	Nan	Nan
XEDGUK	1	1	noZ	noQ4	noWater	0	Neutral	0	1-Neutral	-26.09	Self-delta-pka	Nan	Nan
KAGNOV	1	1	noZ	noQ4	noWater	0	Neutral	0	1-Neutral	-26.09	Self-delta-pka	Nan	Nan
QULZOO	1	1	noZ	noQ4	noWater	0	Neutral	0	1-Neutral	-26.09	Self-delta-pka	Nan	Nan
SUXLAZ	1	1	noZ	noQ4	noWater	0	Neutral	0	1-Neutral	-26.09	Self-delta-pka	Nan	Nan
XUJFOX	1	1	noZ	noQ4	noWater	0	Neutral	0	1-Neutral	-26.09	Self-delta-pka	Nan	Nan
XAQFUQ	1	1	noZ	noQ4	noWater	0	Neutral	0	1-Neutral	-26.09	Self-delta-pka	Nan	Nan
GOLFOD	1	1	noZ	noQ4	noWater	0	Neutral	0	1-Neutral	-26.09	Self-delta-pka	Nan	Nan
TOTDOX	1	1	noZ	noQ4	noWater	0	Neutral	0	1-Neutral	-26.09	Self-delta-pka	Nan	Nan
YEHBIX	1	1	noZ	noQ4	noWater	0	Neutral	0	1-Neutral	-26.09	Self-delta-pka	Nan	Nan
HODPIZ	1	1	noZ	noQ4	noWater	0	Neutral	0	1-Neutral	-26.08	Self-delta-pka	Nan	Nan
HODPOF	1	1	noZ	noQ4	noWater	0	Neutral	0	1-Neutral	-26.08	Self-delta-pka	Nan	Nan
PIRFED	1	1	noZ	noQ4	noWater	0	Neutral	0	1-Neutral	-26.08	Self-delta-pka	Nan	Nan
ROVPAW	1	1	noZ	noQ4	noWater	0	Neutral	0	1-Neutral	-26.08	Self-delta-pka	Nan	Nan
SIJYIW	1	1	noZ	noQ4	noWater	0	Neutral	0	1-Neutral	-26.08	Self-delta-pka	Nan	Nan
TUVXEO	1	1	noZ	noQ4	noWater	0	Neutral	0	1-Neutral	-26.08	Self-delta-pka	Nan	Nan
DCPCBO	1	1	noZ	noQ4	noWater	0	Neutral	0	1-Neutral	-26.08	Self-delta-pka	Nan	Nan
DOVHOM	1	1	noZ	noQ4	noWater	0	Neutral	0	1-Neutral	-26.08	Self-delta-pka	Nan	Nan
POTDOS	1	1	noZ	noQ4	noWater	0	Neutral	0	1-Neutral	-26.08	Self-delta-pka	Nan	Nan
LUZZIR	1	1	noZ	noQ4	noWater	0	Neutral	0	1-Neutral	-26.07	Self-delta-pka	-27.39	Self-delta-pka
DEFMOQ	1	1	noZ	noQ4	noWater	0	Neutral	0	1-Neutral	-26.07	Self-delta-pka	Nan	Nan
IHUKED	1	1	noZ	noQ4	noWater	0	Neutral	0	1-Neutral	-26.07	Self-delta-pka	Nan	Nan
KOKXOZ	1	1	noZ	noQ4	noWater	0	Neutral	0	1-Neutral	-26.07	Self-delta-pka	Nan	Nan
NAFCAY	1	1	noZ	noQ4	noWater	0	Neutral	0	1-Neutral	-26.07	Self-delta-pka	Nan	Nan
QULBIJ	1	1	noZ	noQ4	noWater	0	Neutral	0	1-Neutral	-26.07	Self-delta-pka	Nan	Nan
RADZOM	1	1	noZ	noQ4	noWater	0	Neutral	0	1-Neutral	-26.07	Self-delta-pka	Nan	Nan
TOYLAU	1	1	noZ	noQ4	noWater	0	Neutral	0	1-Neutral	-26.07	Self-delta-pka	Nan	Nan
TUJVUR	1	1	noZ	noQ4	noWater	0	Neutral	0	1-Neutral	-26.07	Self-delta-pka	Nan	Nan
XUCPES	1	1	noZ	noQ4	noWater	0	Neutral	0	1-Neutral	-26.07	Self-delta-pka	Nan	Nan
SAJYAH	1	1	noZ	noQ4	noWater	0	Neutral	0	1-Neutral	-26.06	Self-delta-pka	Nan	Nan
SAJYEL	1	1	noZ	noQ4	noWater	0	Neutral	0	1-Neutral	-26.06	Self-delta-pka	Nan	Nan
CICHIF	1	1	noZ	noQ4	noWater	0	Neutral	0	1-Neutral	-26.06	Self-delta-pka	Nan	Nan
LIQRIM	1	1	noZ	noQ4	noWater	0	Neutral	0	1-Neutral	-26.06	Self-delta-pka	Nan	Nan
MPBPRO	1	1	noZ	noQ4	noWater	0	Neutral	0	1-Neutral	-26.06	Self-delta-pka	Nan	Nan
SIYHUD	1	1	noZ	noQ4	noWater	0	Neutral	0	1-Neutral	-26.06	Self-delta-pka	Nan	Nan
WESDIH	1	1	noZ	noQ4	noWater	0	Neutral	0	1-Neutral	-26.06	Self-delta-pka	Nan	Nan
PIZSOJ01	1	1	noZ	noQ4	noWater	0	Neutral	0	1-Neutral	-26.06	Self-delta-pka	-27.15	Self-delta-pka
DIFXIZ	1	1	noZ	noQ4	noWater	0	Neutral	0	1-Neutral	-26.06	Self-delta-pka	Nan	Nan
OQIVIU	1	1	noZ	noQ4	noWater	0	Neutral	0	1-Neutral	-26.06	Self-delta-pka	Nan	Nan
ROFFOH	1	1	noZ	noQ4	noWater	0	Neutral	0	1-Neutral	-26.06	Self-delta-pka	Nan	Nan
ATOXOW	1	1	noZ	noQ4	noWater	0	Neutral	0	1-Neutral	-26.05	Self-delta-pka	Nan	Nan
GEXFIB	1	1	noZ	noQ4	noWater	0	Neutral	0	1-Neutral	-26.05	Self-delta-pka	Nan	Nan
PEZYIF	1	1	noZ	noQ4	noWater	0	Neutral	0	1-Neutral	-26.05	Self-delta-pka	Nan	Nan
YEHDEU	1	1	noZ	noQ4	noWater	0	Neutral	0	1-Neutral	-26.05	Self-delta-pka	Nan	Nan
MAYDIB	1	1	noZ	noQ4	noWater	0	Neutral	0	1-Neutral	-26.04	Self-delta-pka	-27.24	Self-delta-pka
MAYDOH	1	1	noZ	noQ4	noWater	0	Neutral	0	1-Neutral	-26.04	Self-delta-pka	-27.24	Self-delta-pka
DOVHEC	1	1	noZ	noQ4	noWater	0	Neutral	0	1-Neutral	-26.04	Self-delta-pka	Nan	Nan
PONTUK	1	1	noZ	noQ4	noWater	0	Neutral	0	1-Neutral	-26.04	Self-delta-pka	Nan	Nan
TEKMUT	1	1	noZ	noQ4	noWater	0	Neutral	0	1-Neutral	-26.04	Self-delta-pka	Nan	Nan
VADQUO	1	1	noZ	noQ4	noWater	0	Neutral	0	1-Neutral	-26.04	Self-delta-pka	Nan	Nan
WEHBAN	1	1	noZ	noQ4	noWater	0	Neutral	0	1-Neutral	-26.04	Self-delta-pka	Nan	Nan
MAGLAI	1	1	noZ	noQ4	noWater	0	Neutral	0	1-Neutral	-26.03	Self-delta-pka	-27.22	Self-delta-pka
GARMUH	1	1	noZ	noQ4	noWater	0	Neutral	0	1-Neutral	-26.03	Self-delta-pka	Nan	Nan
JULFUR	1	1	noZ	noQ4	noWater	0	Neutral	0	1-Neutral	-26.03	Self-delta-pka	Nan	Nan
KOXHOW	1	1	noZ	noQ4	noWater	0	Neutral	0	1-Neutral	-26.03	Self-delta-pka	Nan	Nan
NAVLAA	1	1	noZ	noQ4	noWater	0	Neutral	0	1-Neutral	-26.03	Self-delta-pka	Nan	Nan
SAQYUG	1	1	noZ	noQ4	noWater	0	Neutral	0	1-Neutral	-26.03	Self-delta-pka	Nan	Nan
TUVXIS	2	1	noZ	noQ4	noWater	1	Neutral	0	1-N_1-Solvate_	-26.03	Self-delta-pka	Nan	Nan
NAKQIA	1	1	noZ	noQ4	noWater	0	Neutral	0	1-Neutral	-26.03	Self-delta-pka	-27.23	Self-delta-pka
BDMUDO	1	1	noZ	noQ4	noWater	0	Neutral	0	1-Neutral	-26.03	Self-delta-pka	Nan	Nan
CAWCOS	1	1	noZ	noQ4	noWater	0	Neutral	0	1-Neutral	-26.03	Self-delta-pka	Nan	Nan
XESKOV	1	1	noZ	noQ4	noWater	0	Neutral	0	1-Neutral	-26.03	Self-delta-pka	Nan	Nan
CEPZEC	1	1	noZ	noQ4	noWater	0	Neutral	0	1-Neutral	-26.02	Self-delta-pka	Nan	Nan
GIYFOK	1	1	noZ	noQ4	noWater	0	Neutral	0	1-Neutral	-26.02	Self-delta-pka	Nan	Nan
SELCES	1	1	noZ	noQ4	noWater	0	Neutral	0	1-Neutral	-26.02	Self-delta-pka	Nan	Nan
FIYYAO	1	1	noZ	noQ4	noWater	0	Neutral	0	1-Neutral	-26.01	Self-delta-pka	Nan	Nan
HOKPUS	1	1	noZ	noQ4	noWater	0	Neutral	0	1-Neutral	-26.01	Self-delta-pka	Nan	Nan
HOKPUS01	1	1	noZ	noQ4	noWater	0	Neutral	0	1-Neutral	-26.01	Self-delta-pka	Nan	Nan
ZIVCOW	1	1	noZ	noQ4	noWater	0	Neutral	0	1-Neutral	-26.01	Self-delta-pka	Nan	Nan
CYHEXO01	1	1	noZ	noQ4	noWater	0	Neutral	0	1-Neutral	-26	Self-delta-pka	Nan	Nan
HORPOW	1	1	noZ	noQ4	noWater	0	Neutral	0	1-Neutral	-26	Self-delta-pka	Nan	Nan
PEJHIV	1	1	noZ	noQ4	noWater	0	Neutral	0	1-Neutral	-26	Self-delta-pka	Nan	Nan
TCXCPD	1	1	noZ	noQ4	noWater	0	Neutral	0	1-Neutral	-26	Self-delta-pka	Nan	Nan
UKUZAE	1	1	noZ	noQ4	noWater	0	Neutral	0	1-Neutral	-25.99	Self-delta-pka	Nan	Nan
DODCUU	1	1	noZ	noQ4	noWater	0	Neutral	0	1-Neutral	-25.99	Self-delta-pka	Nan	Nan
EJIDUX	1	1	noZ	noQ4	noWater	0	Neutral	0	1-Neutral	-25.99	Self-delta-pka	Nan	Nan
FERLUM	1	1	noZ	noQ4	noWater	0	Neutral	0	1-Neutral	-25.99	Self-delta-pka	Nan	Nan
TIMGOM	1	1	noZ	noQ4	noWater	0	Neutral	0	1-Neutral	-25.99	Self-delta-pka	Nan	Nan
MONVEQ	1	1	noZ	noQ4	noWater	0	Neutral	0	1-Neutral	-25.99	Self-delta-pka	Nan	Nan
ZETZEG	1	1	noZ	noQ4	noWater	0	Neutral	0	1-Neutral	-25.99	Self-delta-pka	Nan	Nan
LUZZUD	2	1	noZ	noQ4	noWater	1	Neutral	0	1-N_1-Solvate_	-25.99	Self-delta-pka	Nan	Nan
ACUVAX	1	1	noZ	noQ4	noWater	0	Neutral	0	1-Neutral	-25.98	Self-delta-pka	Nan	Nan
CAFLUQ	1	1	noZ	noQ4	noWater	0	Neutral	0	1-Neutral	-25.98	Self-delta-pka	Nan	Nan
JADTAJ	1	1	noZ	noQ4	noWater	0	Neutral	0	1-Neutral	-25.98	Self-delta-pka	Nan	Nan
JENXUY	1	1	noZ	noQ4	noWater	0	Neutral	0	1-Neutral	-25.98	Self-delta-pka	Nan	Nan
KIMQIG	1	1	noZ	noQ4	noWater	0	Neutral	0	1-Neutral	-25.98	Self-delta-pka	Nan	Nan
TEMXUE	1	1	noZ	noQ4	noWater	0	Neutral	0	1-Neutral	-25.98	Self-delta-pka	Nan	Nan
WEDFES	1	1	noZ	noQ4	noWater	0	Neutral	0	1-Neutral	-25.98	Self-delta-pka	Nan	Nan
DINMAO10	1	1	noZ	noQ4	noWater	0	Neutral	0	1-Neutral	-25.98	Self-delta-pka	Nan	Nan
DECVOX	1	1	noZ	noQ4	noWater	0	Neutral	0	1-Neutral	-25.97	Self-delta-pka	Nan	Nan
DECVUD	1	1	noZ	noQ4	noWater	0	Neutral	0	1-Neutral	-25.97	Self-delta-pka	Nan	Nan
GEDYIY	1	1	noZ	noQ4	noWater	0	Neutral	0	1-Neutral	-25.97	Self-delta-pka	Nan	Nan
MEKHES	1	1	noZ	noQ4	noWater	0	Neutral	0	1-Neutral	-25.97	Self-delta-pka	Nan	Nan
PIDSOK01	1	1	noZ	noQ4	noWater	0	Neutral	0	1-Neutral	-25.97	Self-delta-pka	Nan	Nan
SIYBAE	1	1	noZ	noQ4	noWater	0	Neutral	0	1-Neutral	-25.97	Self-delta-pka	Nan	Nan
SIYBIM	1	1	noZ	noQ4	noWater	0	Neutral	0	1-Neutral	-25.97	Self-delta-pka	Nan	Nan
CAKMUY	1	1	noZ	noQ4	noWater	0	Neutral	0	1-Neutral	-25.97	Self-delta-pka	Nan	Nan
RIRXEX	1	1	noZ	noQ4	noWater	0	Neutral	0	1-Neutral	-25.97	Self-delta-pka	Nan	Nan
SIXZUV	1	1	noZ	noQ4	noWater	0	Neutral	0	1-Neutral	-25.97	Self-delta-pka	Nan	Nan
SIYBUY	1	1	noZ	noQ4	noWater	0	Neutral	0	1-Neutral	-25.97	Self-delta-pka	Nan	Nan
CEJWAP	1	1	noZ	noQ4	noWater	0	Neutral	0	1-Neutral	-25.96	Self-delta-pka	Nan	Nan
DUNXOA	1	1	noZ	noQ4	noWater	0	Neutral	0	1-Neutral	-25.96	Self-delta-pka	Nan	Nan
HOQZIY	1	1	noZ	noQ4	noWater	0	Neutral	0	1-Neutral	-25.96	Self-delta-pka	Nan	Nan
KOBSEZ	1	1	noZ	noQ4	noWater	0	Neutral	0	1-Neutral	-25.96	Self-delta-pka	Nan	Nan
TUNVAZ	1	1	noZ	noQ4	noWater	0	Neutral	0	1-Neutral	-25.96	Self-delta-pka	Nan	Nan
COHLIW	1	1	noZ	noQ4	noWater	0	Neutral	0	1-Neutral	-25.96	Self-delta-pka	Nan	Nan
OGELUI	1	1	noZ	noQ4	noWater	0	Neutral	0	1-Neutral	-25.96	Self-delta-pka	Nan	Nan
OGELUI01	1	1	noZ	noQ4	noWater	0	Neutral	0	1-Neutral	-25.96	Self-delta-pka	Nan	Nan
WASCAV	1	1	noZ	noQ4	noWater	0	Neutral	0	1-Neutral	-25.95	Self-delta-pka	Nan	Nan
GUXHOW	1	1	noZ	noQ4	noWater	0	Neutral	0	1-Neutral	-25.95	Self-delta-pka	-27.05	Self-delta-pka
CEHYEW	1	1	noZ	noQ4	noWater	0	Neutral	0	1-Neutral	-25.95	Self-delta-pka	Nan	Nan
EIPREA	1	1	noZ	noQ4	noWater	0	Neutral	0	1-Neutral	-25.95	Self-delta-pka	Nan	Nan
FACSUZ	1	1	noZ	noQ4	noWater	0	Neutral	0	1-Neutral	-25.95	Self-delta-pka	Nan	Nan
FACTEK	1	1	noZ	noQ4	noWater	0	Neutral	0	1-Neutral	-25.95	Self-delta-pka	Nan	Nan
FASCIM	1	1	noZ	noQ4	noWater	0	Neutral	0	1-Neutral	-25.95	Self-delta-pka	Nan	Nan
IREXEI	1	1	noZ	noQ4	noWater	0	Neutral	0	1-Neutral	-25.95	Self-delta-pka	Nan	Nan
KUGDEV	1	1	noZ	noQ4	noWater	0	Neutral	0	1-Neutral	-25.95	Self-delta-pka	Nan	Nan
NBPENC	1	1	noZ	noQ4	noWater	0	Neutral	0	1-Neutral	-25.95	Self-delta-pka	Nan	Nan
SEMLIG	1	1	noZ	noQ4	noWater	0	Neutral	0	1-Neutral	-25.95	Self-delta-pka	Nan	Nan
XOFCUT	1	1	noZ	noQ4	noWater	0	Neutral	0	1-Neutral	-25.95	Self-delta-pka	Nan	Nan
YERJUA	1	1	noZ	noQ4	noWater	0	Neutral	0	1-Neutral	-25.94	Self-delta-pka	-27.23	Self-delta-pka
GICTOC	1	1	noZ	noQ4	noWater	0	Neutral	0	1-Neutral	-25.94	Self-delta-pka	Nan	Nan
PUFHEE	1	1	noZ	noQ4	noWater	0	Neutral	0	1-Neutral	-25.94	Self-delta-pka	Nan	Nan
TODYAP	1	1	noZ	noQ4	noWater	0	Neutral	0	1-Neutral	-25.94	Self-delta-pka	Nan	Nan
BPSUNO	2	1	noZ	noQ4	noWater	1	Neutral	0	1-N_1-Solvate_	-25.94	Self-delta-pka	Nan	Nan
JAFJAF	1	1	noZ	noQ4	noWater	0	Neutral	0	1-Neutral	-25.94	Self-delta-pka	Nan	Nan
BXCYPO	1	1	noZ	noQ4	noWater	0	Neutral	0	1-Neutral	-25.94	Self-delta-pka	Nan	Nan
COHXUV	1	1	noZ	noQ4	noWater	0	Neutral	0	1-Neutral	-25.94	Self-delta-pka	Nan	Nan
GARXEE	1	1	noZ	noQ4	noWater	0	Neutral	0	1-Neutral	-25.94	Self-delta-pka	Nan	Nan
HIVTEL	1	1	noZ	noQ4	noWater	0	Neutral	0	1-Neutral	-25.94	Self-delta-pka	Nan	Nan
LOLLIJ	1	1	noZ	noQ4	noWater	0	Neutral	0	1-Neutral	-25.94	Self-delta-pka	Nan	Nan
ROQJIQ	1	1	noZ	noQ4	noWater	0	Neutral	0	1-Neutral	-25.94	Self-delta-pka	Nan	Nan
WOXKID	1	1	noZ	noQ4	noWater	0	Neutral	0	1-Neutral	-25.94	Self-delta-pka	Nan	Nan
WOXKOJ	1	1	noZ	noQ4	noWater	0	Neutral	0	1-Neutral	-25.94	Self-delta-pka	Nan	Nan
WOXLIE	1	1	noZ	noQ4	noWater	0	Neutral	0	1-Neutral	-25.94	Self-delta-pka	Nan	Nan
XECZIP	1	1	noZ	noQ4	noWater	0	Neutral	0	1-Neutral	-25.93	Self-delta-pka	-27.21	Self-delta-pka
BEMGIK	1	1	noZ	noQ4	noWater	0	Neutral	0	1-Neutral	-25.93	Self-delta-pka	Nan	Nan
CAGTEJ	1	1	noZ	noQ4	noWater	0	Neutral	0	1-Neutral	-25.93	Self-delta-pka	Nan	Nan
KUYCEM	1	1	noZ	noQ4	noWater	0	Neutral	0	1-Neutral	-25.93	Self-delta-pka	Nan	Nan
YACQEZ	1	1	noZ	noQ4	noWater	0	Neutral	0	1-Neutral	-25.93	Self-delta-pka	Nan	Nan
WECPUR	1	1	noZ	noQ4	noWater	0	Neutral	0	1-Neutral	-25.93	Self-delta-pka	Nan	Nan
ZUGHAK	1	1	noZ	noQ4	noWater	0	Neutral	0	1-Neutral	-25.93	Self-delta-pka	Nan	Nan
YIJNOU	1	1	noZ	noQ4	noWater	0	Neutral	0	1-Neutral	-25.93	Self-delta-pka	Nan	Nan
FOSPEI	1	1	noZ	noQ4	noWater	0	Neutral	0	1-Neutral	-25.92	Self-delta-pka	Nan	Nan
ROFFIB	1	1	noZ	noQ4	noWater	0	Neutral	0	1-Neutral	-25.92	Self-delta-pka	Nan	Nan
ROHQIP	1	1	noZ	noQ4	noWater	0	Neutral	0	1-Neutral	-25.92	Self-delta-pka	Nan	Nan
CNOXPA	1	1	noZ	noQ4	noWater	0	Neutral	0	1-Neutral	-25.92	Self-delta-pka	Nan	Nan
HUDGAP	1	1	noZ	noQ4	noWater	0	Neutral	0	1-Neutral	-25.92	Self-delta-pka	Nan	Nan
KUWXOR	1	1	noZ	noQ4	noWater	0	Neutral	0	1-Neutral	-25.92	Self-delta-pka	Nan	Nan
SOBSIL	1	1	noZ	noQ4	noWater	0	Neutral	0	1-Neutral	-25.92	Self-delta-pka	Nan	Nan
ODOQED	1	1	noZ	noQ4	noWater	0	Neutral	0	1-Neutral	-25.91	Self-delta-pka	-29.27	Self-delta-pka
JEYJED	1	1	noZ	noQ4	noWater	0	Neutral	0	1-Neutral	-25.91	Self-delta-pka	-26.87	Self-delta-pka
ECIHAZ	1	1	noZ	noQ4	noWater	0	Neutral	0	1-Neutral	-25.91	Self-delta-pka	Nan	Nan
HUWCOT	1	1	noZ	noQ4	noWater	0	Neutral	0	1-Neutral	-25.91	Self-delta-pka	Nan	Nan
QUFJIM	1	1	noZ	noQ4	noWater	0	Neutral	0	1-Neutral	-25.91	Self-delta-pka	Nan	Nan
SEFLOE	1	1	noZ	noQ4	noWater	0	Neutral	0	1-Neutral	-25.91	Self-delta-pka	Nan	Nan
IVENIH	1	1	noZ	noQ4	noWater	0	Neutral	0	1-Neutral	-25.9	Self-delta-pka	Nan	Nan
SAKFOA	1	1	noZ	noQ4	noWater	0	Neutral	0	1-Neutral	-25.9	Self-delta-pka	Nan	Nan
TBCNOE	1	1	noZ	noQ4	noWater	0	Neutral	0	1-Neutral	-25.9	Self-delta-pka	-27.12	Self-delta-pka
HAVXOU	1	1	noZ	noQ4	noWater	0	Neutral	0	1-Neutral	-25.9	Self-delta-pka	Nan	Nan
LATPEB	1	1	noZ	noQ4	noWater	0	Neutral	0	1-Neutral	-25.9	Self-delta-pka	Nan	Nan
XIVZIL	1	1	noZ	noQ4	noWater	0	Neutral	0	1-Neutral	-25.9	Self-delta-pka	Nan	Nan
KARQAX	2	1	noZ	noQ4	Water	0	Neutral	0	1-N__Hydrate	-25.9	Self-delta-pka	Nan	Nan
CICRIQ	1	1	noZ	noQ4	noWater	0	Neutral	0	1-Neutral	-25.89	Self-delta-pka	-26.98	Self-delta-pka
ACUFIN	1	1	noZ	noQ4	noWater	0	Neutral	0	1-Neutral	-25.89	Self-delta-pka	Nan	Nan
ACUFUZ	1	1	noZ	noQ4	noWater	0	Neutral	0	1-Neutral	-25.89	Self-delta-pka	Nan	Nan
AJEVER	1	1	noZ	noQ4	noWater	0	Neutral	0	1-Neutral	-25.89	Self-delta-pka	Nan	Nan
APTHOX10	1	1	noZ	noQ4	noWater	0	Neutral	0	1-Neutral	-25.89	Self-delta-pka	Nan	Nan
EPTHOX10	1	1	noZ	noQ4	noWater	0	Neutral	0	1-Neutral	-25.89	Self-delta-pka	Nan	Nan
FEFLUX	1	1	noZ	noQ4	noWater	0	Neutral	0	1-Neutral	-25.89	Self-delta-pka	Nan	Nan
JUXFEP	1	1	noZ	noQ4	noWater	0	Neutral	0	1-Neutral	-25.89	Self-delta-pka	Nan	Nan
JUXFIT	1	1	noZ	noQ4	noWater	0	Neutral	0	1-Neutral	-25.89	Self-delta-pka	Nan	Nan
WEWPUK	1	1	noZ	noQ4	noWater	0	Neutral	0	1-Neutral	-25.89	Self-delta-pka	Nan	Nan
NATSEG	2	1	noZ	noQ4	noWater	1	Neutral	0	1-N_1-Solvate_	-25.89	Self-delta-pka	Nan	Nan
KOLXEO	1	1	noZ	noQ4	noWater	0	Neutral	0	1-Neutral	-25.88	Self-delta-pka	Nan	Nan
CLDECO10	1	1	noZ	noQ4	noWater	0	Neutral	0	1-Neutral	-25.88	Self-delta-pka	Nan	Nan
DUHXUZ	1	1	noZ	noQ4	noWater	0	Neutral	0	1-Neutral	-25.88	Self-delta-pka	Nan	Nan
XUHCOT	1	1	noZ	noQ4	noWater	0	Neutral	0	1-Neutral	-25.88	Self-delta-pka	Nan	Nan
KUWXUX	2	1	noZ	noQ4	noWater	1	Neutral	0	1-N_1-Solvate_	-25.88	Self-delta-pka	Nan	Nan
BAYPEW	1	1	noZ	noQ4	noWater	0	Neutral	0	1-Neutral	-25.87	Self-delta-pka	Nan	Nan
CBCYHO	1	1	noZ	noQ4	noWater	0	Neutral	0	1-Neutral	-25.87	Self-delta-pka	Nan	Nan
NOYWED	1	1	noZ	noQ4	noWater	0	Neutral	0	1-Neutral	-25.87	Self-delta-pka	Nan	Nan
NUKVUK	1	1	noZ	noQ4	noWater	0	Neutral	0	1-Neutral	-25.87	Self-delta-pka	Nan	Nan
POSVOK	1	1	noZ	noQ4	noWater	0	Neutral	0	1-Neutral	-25.87	Self-delta-pka	Nan	Nan
VAZYIH	1	1	noZ	noQ4	noWater	0	Neutral	0	1-Neutral	-25.87	Self-delta-pka	-26.97	Self-delta-pka
KISPUY	1	1	noZ	noQ4	noWater	0	Neutral	0	1-Neutral	-25.87	Self-delta-pka	Nan	Nan
KOLXIS	1	1	noZ	noQ4	noWater	0	Neutral	0	1-Neutral	-25.87	Self-delta-pka	Nan	Nan
RADWUR	1	1	noZ	noQ4	noWater	0	Neutral	0	1-Neutral	-25.87	Self-delta-pka	Nan	Nan
NOCQAX	1	1	noZ	noQ4	noWater	0	Neutral	0	1-Neutral	-25.86	Self-delta-pka	Nan	Nan
PAGBEI	1	1	noZ	noQ4	noWater	0	Neutral	0	1-Neutral	-25.86	Self-delta-pka	Nan	Nan
HISDUK	1	1	noZ	noQ4	noWater	0	Neutral	0	1-Neutral	-25.86	Self-delta-pka	Nan	Nan
KOLZOD	1	1	noZ	noQ4	noWater	0	Neutral	0	1-Neutral	-25.86	Self-delta-pka	Nan	Nan
MAQHAO	1	1	noZ	noQ4	noWater	0	Neutral	0	1-Neutral	-25.86	Self-delta-pka	Nan	Nan
MILWAI	1	1	noZ	noQ4	noWater	0	Neutral	0	1-Neutral	-25.86	Self-delta-pka	Nan	Nan
MOSBEC	1	1	noZ	noQ4	noWater	0	Neutral	0	1-Neutral	-25.86	Self-delta-pka	Nan	Nan
SUHYAX	1	1	noZ	noQ4	noWater	0	Neutral	0	1-Neutral	-25.86	Self-delta-pka	Nan	Nan
BAVFAI	1	1	noZ	noQ4	noWater	0	Neutral	0	1-Neutral	-25.85	Self-delta-pka	Nan	Nan
BOKVIG	1	1	noZ	noQ4	noWater	0	Neutral	0	1-Neutral	-25.85	Self-delta-pka	Nan	Nan
UCILUQ	1	1	noZ	noQ4	noWater	0	Neutral	0	1-Neutral	-25.85	Self-delta-pka	Nan	Nan
GUDQAZ	1	1	noZ	noQ4	noWater	0	Neutral	0	1-Neutral	-25.84	Self-delta-pka	-26.89	Self-delta-pka
GUDQED	1	1	noZ	noQ4	noWater	0	Neutral	0	1-Neutral	-25.84	Self-delta-pka	-26.89	Self-delta-pka
EXODAW	1	1	noZ	noQ4	noWater	0	Neutral	0	1-Neutral	-25.84	Self-delta-pka	Nan	Nan
GIYFIE	1	1	noZ	noQ4	noWater	0	Neutral	0	1-Neutral	-25.84	Self-delta-pka	Nan	Nan
HARSEB	1	1	noZ	noQ4	noWater	0	Neutral	0	1-Neutral	-25.84	Self-delta-pka	Nan	Nan
IKUDEZ	1	1	noZ	noQ4	noWater	0	Neutral	0	1-Neutral	-25.84	Self-delta-pka	Nan	Nan
SIQQOZ	1	1	noZ	noQ4	noWater	0	Neutral	0	1-Neutral	-25.84	Self-delta-pka	Nan	Nan
TAXFEF	1	1	noZ	noQ4	noWater	0	Neutral	0	1-Neutral	-25.83	Self-delta-pka	Nan	Nan
UHAKIX	1	1	noZ	noQ4	noWater	0	Neutral	0	1-Neutral	-25.83	Self-delta-pka	-27.07	Self-delta-pka
KUWXEH	1	1	noZ	noQ4	noWater	0	Neutral	0	1-Neutral	-25.83	Self-delta-pka	Nan	Nan
BATTEV	1	1	noZ	noQ4	noWater	0	Neutral	0	1-Neutral	-25.82	Self-delta-pka	Nan	Nan
CMNOPO	1	1	noZ	noQ4	noWater	0	Neutral	0	1-Neutral	-25.82	Self-delta-pka	Nan	Nan
FUXVOL	1	1	noZ	noQ4	noWater	0	Neutral	0	1-Neutral	-25.82	Self-delta-pka	Nan	Nan
QITKIO	1	1	noZ	noQ4	noWater	0	Neutral	0	1-Neutral	-25.82	Self-delta-pka	Nan	Nan
REGHOB	1	1	noZ	noQ4	noWater	0	Neutral	0	1-Neutral	-25.82	Self-delta-pka	Nan	Nan
TOKVOF	1	1	noZ	noQ4	noWater	0	Neutral	0	1-Neutral	-25.82	Self-delta-pka	Nan	Nan
VOBWOA	1	1	noZ	noQ4	noWater	0	Neutral	0	1-Neutral	-25.82	Self-delta-pka	Nan	Nan
ZUWCAX	1	1	noZ	noQ4	noWater	0	Neutral	0	1-Neutral	-25.82	Self-delta-pka	Nan	Nan
RUXZAM	1	1	noZ	noQ4	noWater	0	Neutral	0	1-Neutral	-25.81	Self-delta-pka	Nan	Nan
DEFDIB	1	1	noZ	noQ4	noWater	0	Neutral	0	1-Neutral	-25.81	Self-delta-pka	Nan	Nan
WACQOJ	1	1	noZ	noQ4	noWater	0	Neutral	0	1-Neutral	-25.81	Self-delta-pka	Nan	Nan
BABROL	1	1	noZ	noQ4	noWater	0	Neutral	0	1-Neutral	-25.8	Self-delta-pka	Nan	Nan
DECWAK	1	1	noZ	noQ4	noWater	0	Neutral	0	1-Neutral	-25.8	Self-delta-pka	Nan	Nan
DECWEO	1	1	noZ	noQ4	noWater	0	Neutral	0	1-Neutral	-25.8	Self-delta-pka	Nan	Nan
KATSOQ	1	1	noZ	noQ4	noWater	0	Neutral	0	1-Neutral	-25.8	Self-delta-pka	Nan	Nan
KATTAD	1	1	noZ	noQ4	noWater	0	Neutral	0	1-Neutral	-25.8	Self-delta-pka	Nan	Nan
KATTEH	1	1	noZ	noQ4	noWater	0	Neutral	0	1-Neutral	-25.8	Self-delta-pka	Nan	Nan
KECQEP	1	1	noZ	noQ4	noWater	0	Neutral	0	1-Neutral	-25.8	Self-delta-pka	Nan	Nan
MCMXCM	1	1	noZ	noQ4	noWater	0	Neutral	0	1-Neutral	-25.8	Self-delta-pka	Nan	Nan
SIYBEI	1	1	noZ	noQ4	noWater	0	Neutral	0	1-Neutral	-25.8	Self-delta-pka	Nan	Nan
SIYBOS	1	1	noZ	noQ4	noWater	0	Neutral	0	1-Neutral	-25.8	Self-delta-pka	Nan	Nan
ZUWTOD	1	1	noZ	noQ4	noWater	0	Neutral	0	1-Neutral	-25.8	Self-delta-pka	Nan	Nan
KUCGAR	1	1	noZ	noQ4	noWater	0	Neutral	0	1-Neutral	-25.8	Self-delta-pka	Nan	Nan
TAHPUN	1	1	noZ	noQ4	noWater	0	Neutral	0	1-Neutral	-25.8	Self-delta-pka	Nan	Nan
TAHQAU	1	1	noZ	noQ4	noWater	0	Neutral	0	1-Neutral	-25.8	Self-delta-pka	Nan	Nan
EBUTED	1	1	noZ	noQ4	noWater	0	Neutral	0	1-Neutral	-25.79	Self-delta-pka	Nan	Nan
HIFGAF	1	1	noZ	noQ4	noWater	0	Neutral	0	1-Neutral	-25.79	Self-delta-pka	Nan	Nan
SIMJOQ	1	1	noZ	noQ4	noWater	0	Neutral	0	1-Neutral	-25.79	Self-delta-pka	Nan	Nan
WOXKUP	1	1	noZ	noQ4	noWater	0	Neutral	0	1-Neutral	-25.79	Self-delta-pka	Nan	Nan
GACBUL	1	1	noZ	noQ4	noWater	0	Neutral	0	1-Neutral	-25.78	Self-delta-pka	Nan	Nan
ZUWCIF	1	1	noZ	noQ4	noWater	0	Neutral	0	1-Neutral	-25.78	Self-delta-pka	Nan	Nan
CEGDOH	1	1	noZ	noQ4	noWater	0	Neutral	0	1-Neutral	-25.77	Self-delta-pka	-27.02	Self-delta-pka
XIVKOF	1	1	noZ	noQ4	noWater	0	Neutral	0	1-Neutral	-25.77	Self-delta-pka	Nan	Nan
CAFBOE	1	1	noZ	noQ4	noWater	0	Neutral	0	1-Neutral	-25.77	Self-delta-pka	Nan	Nan
FUVYIE	1	1	noZ	noQ4	noWater	0	Neutral	0	1-Neutral	-25.77	Self-delta-pka	Nan	Nan
HEZPAE	1	1	noZ	noQ4	noWater	0	Neutral	0	1-Neutral	-25.77	Self-delta-pka	Nan	Nan
VOCVUF	1	1	noZ	noQ4	noWater	0	Neutral	0	1-Neutral	-25.77	Self-delta-pka	Nan	Nan
WACQID	1	1	noZ	noQ4	noWater	0	Neutral	0	1-Neutral	-25.77	Self-delta-pka	Nan	Nan
BEQUAC10	1	1	noZ	noQ4	noWater	0	Neutral	0	1-Neutral	-25.76	Self-delta-pka	-26.62	Self-delta-pka
GUYFIR	1	1	noZ	noQ4	noWater	0	Neutral	0	1-Neutral	-25.76	Self-delta-pka	Nan	Nan
UCIDAO	1	1	noZ	noQ4	noWater	0	Neutral	0	1-Neutral	-25.76	Self-delta-pka	Nan	Nan
GEJHEI	1	1	noZ	noQ4	noWater	0	Neutral	0	1-Neutral	-25.76	Self-delta-pka	-27.21	Self-delta-pka
EXODEA	1	1	noZ	noQ4	noWater	0	Neutral	0	1-Neutral	-25.76	Self-delta-pka	Nan	Nan
GUCPAW	1	1	noZ	noQ4	noWater	0	Neutral	0	1-Neutral	-25.76	Self-delta-pka	Nan	Nan
GUCPEA	1	1	noZ	noQ4	noWater	0	Neutral	0	1-Neutral	-25.76	Self-delta-pka	Nan	Nan
IQUTIZ	1	1	noZ	noQ4	noWater	0	Neutral	0	1-Neutral	-25.76	Self-delta-pka	Nan	Nan
NOKTIT	1	1	noZ	noQ4	noWater	0	Neutral	0	1-Neutral	-25.76	Self-delta-pka	Nan	Nan
XIMFAA	1	1	noZ	noQ4	noWater	0	Neutral	0	1-Neutral	-25.76	Self-delta-pka	Nan	Nan
XODMOU	1	1	noZ	noQ4	noWater	0	Neutral	0	1-Neutral	-25.76	Self-delta-pka	Nan	Nan
ZAYXUU	1	1	noZ	noQ4	noWater	0	Neutral	0	1-Neutral	-25.76	Self-delta-pka	Nan	Nan
BIVNEC	1	1	noZ	noQ4	noWater	0	Neutral	0	1-Neutral	-25.75	Self-delta-pka	Nan	Nan
DUTNOW	1	1	noZ	noQ4	noWater	0	Neutral	0	1-Neutral	-25.75	Self-delta-pka	Nan	Nan
EXODIE	1	1	noZ	noQ4	noWater	0	Neutral	0	1-Neutral	-25.75	Self-delta-pka	Nan	Nan
IFOFOB	1	1	noZ	noQ4	noWater	0	Neutral	0	1-Neutral	-25.75	Self-delta-pka	Nan	Nan
IFOLIA	1	1	noZ	noQ4	noWater	0	Neutral	0	1-Neutral	-25.75	Self-delta-pka	Nan	Nan
YIWCAI	1	1	noZ	noQ4	noWater	0	Neutral	0	1-Neutral	-25.75	Self-delta-pka	Nan	Nan
HERBAS	1	1	noZ	noQ4	noWater	0	Neutral	0	1-Neutral	-25.74	Self-delta-pka	-27.03	Self-delta-pka
FEBWAN	1	1	noZ	noQ4	noWater	0	Neutral	0	1-Neutral	-25.74	Self-delta-pka	Nan	Nan
HAZDUK	1	1	noZ	noQ4	noWater	0	Neutral	0	1-Neutral	-25.74	Self-delta-pka	Nan	Nan
DEMDUV	1	1	noZ	noQ4	noWater	0	Neutral	0	1-Neutral	-25.74	Self-delta-pka	-26.81	Self-delta-pka
FIZCEW	1	1	noZ	noQ4	noWater	0	Neutral	0	1-Neutral	-25.74	Self-delta-pka	Nan	Nan
KIZMOY	1	1	noZ	noQ4	noWater	0	Neutral	0	1-Neutral	-25.74	Self-delta-pka	Nan	Nan
BUYQIV	1	1	noZ	noQ4	noWater	0	Neutral	0	1-Neutral	-25.73	Self-delta-pka	-27.14	Self-delta-pka
PAZHII	1	1	noZ	noQ4	noWater	0	Neutral	0	1-Neutral	-25.73	Self-delta-pka	-26.8	Self-delta-pka
FAJYUO	1	1	noZ	noQ4	noWater	0	Neutral	0	1-Neutral	-25.73	Self-delta-pka	Nan	Nan
FACXOY	1	1	noZ	noQ4	noWater	0	Neutral	0	1-Neutral	-25.73	Self-delta-pka	Nan	Nan
UQELAE	1	1	noZ	noQ4	noWater	0	Neutral	0	1-Neutral	-25.73	Self-delta-pka	Nan	Nan
BROPSY	1	1	Zwit	Q4	noWater	0	Neutral	0	1-NeutralZQ4	-25.73	Self-delta-pka	Nan	Nan
KIDVOL	2	1	noZ	noQ4	Water	0	Neutral	0	1-N__Hydrate	-25.73	Self-delta-pka	Nan	Nan
YODZOJ	1	1	noZ	noQ4	noWater	0	Neutral	0	1-Neutral	-25.73	Self-delta-pka	Nan	Nan
ABAXES	1	1	noZ	noQ4	noWater	0	Neutral	0	1-Neutral	-25.72	Self-delta-pka	Nan	Nan
BBAXES	1	1	noZ	noQ4	noWater	0	Neutral	0	1-Neutral	-25.72	Self-delta-pka	Nan	Nan
CUMRUX	1	1	noZ	noQ4	noWater	0	Neutral	0	1-Neutral	-25.72	Self-delta-pka	Nan	Nan
IXAJOI	1	1	noZ	noQ4	noWater	0	Neutral	0	1-Neutral	-25.72	Self-delta-pka	Nan	Nan
NEGBEG	1	1	noZ	noQ4	noWater	0	Neutral	0	1-Neutral	-25.72	Self-delta-pka	Nan	Nan
BOBNAI	1	1	noZ	noQ4	noWater	0	Neutral	0	1-Neutral	-25.71	Self-delta-pka	Nan	Nan
EBUTIH	1	1	noZ	noQ4	noWater	0	Neutral	0	1-Neutral	-25.71	Self-delta-pka	Nan	Nan
LAHKAH	1	1	noZ	noQ4	noWater	0	Neutral	0	1-Neutral	-25.71	Self-delta-pka	Nan	Nan
QUKZEB	1	1	noZ	noQ4	noWater	0	Neutral	0	1-Neutral	-25.71	Self-delta-pka	Nan	Nan
GUQHIM	1	1	noZ	noQ4	noWater	0	Neutral	0	1-Neutral	-25.7	Self-delta-pka	Nan	Nan
DIHWEW	1	1	noZ	noQ4	noWater	0	Neutral	0	1-Neutral	-25.7	Self-delta-pka	Nan	Nan
GASZEH	1	1	noZ	noQ4	noWater	0	Neutral	0	1-Neutral	-25.7	Self-delta-pka	Nan	Nan
GASZIL	1	1	noZ	noQ4	noWater	0	Neutral	0	1-Neutral	-25.7	Self-delta-pka	Nan	Nan
LUMSET	1	1	noZ	noQ4	noWater	0	Neutral	0	1-Neutral	-25.7	Self-delta-pka	Nan	Nan
GETDEP	1	1	noZ	noQ4	noWater	0	Neutral	0	1-Neutral	-25.7	Self-delta-pka	Nan	Nan
GICVET	1	1	noZ	noQ4	noWater	0	Neutral	0	1-Neutral	-25.7	Self-delta-pka	Nan	Nan
IKIGEO	1	1	noZ	noQ4	noWater	0	Neutral	0	1-Neutral	-25.7	Self-delta-pka	Nan	Nan
MOHYUF	1	1	noZ	noQ4	noWater	0	Neutral	0	1-Neutral	-25.7	Self-delta-pka	Nan	Nan
QUHTIW	1	1	noZ	noQ4	noWater	0	Neutral	0	1-Neutral	-25.7	Self-delta-pka	Nan	Nan
SUPMIB	1	1	noZ	noQ4	noWater	0	Neutral	0	1-Neutral	-25.7	Self-delta-pka	Nan	Nan
YOPPEY	1	1	noZ	noQ4	noWater	0	Neutral	0	1-Neutral	-25.7	Self-delta-pka	Nan	Nan
XOFCON	1	1	noZ	noQ4	noWater	0	Neutral	0	1-Neutral	-25.7	Self-delta-pka	Nan	Nan
ZIVLIB	1	1	noZ	noQ4	noWater	0	Neutral	0	1-Neutral	-25.7	Self-delta-pka	Nan	Nan
ZIVLOH	1	1	noZ	noQ4	noWater	0	Neutral	0	1-Neutral	-25.7	Self-delta-pka	Nan	Nan
ZIVLUN	1	1	noZ	noQ4	noWater	0	Neutral	0	1-Neutral	-25.7	Self-delta-pka	Nan	Nan
ZIVNOJ	1	1	noZ	noQ4	noWater	0	Neutral	0	1-Neutral	-25.7	Self-delta-pka	Nan	Nan
COSPUW	1	1	noZ	noQ4	noWater	0	Neutral	0	1-Neutral	-25.69	Self-delta-pka	Nan	Nan
HIXVOZ	1	1	noZ	noQ4	noWater	0	Neutral	0	1-Neutral	-25.69	Self-delta-pka	Nan	Nan
NEGBAC	1	1	noZ	noQ4	noWater	0	Neutral	0	1-Neutral	-25.69	Self-delta-pka	Nan	Nan
WOCXUH	1	1	noZ	noQ4	noWater	0	Neutral	0	1-Neutral	-25.69	Self-delta-pka	Nan	Nan
JAPYII	1	1	noZ	noQ4	noWater	0	Neutral	0	1-Neutral	-25.69	Self-delta-pka	Nan	Nan
XIMWIC	1	1	noZ	noQ4	noWater	0	Neutral	0	1-Neutral	-25.69	Self-delta-pka	Nan	Nan
GASZAD	1	1	noZ	noQ4	noWater	0	Neutral	0	1-Neutral	-25.68	Self-delta-pka	Nan	Nan
ICUZOX	1	1	noZ	noQ4	noWater	0	Neutral	0	1-Neutral	-25.68	Self-delta-pka	Nan	Nan
JECPOZ	1	1	noZ	noQ4	noWater	0	Neutral	0	1-Neutral	-25.68	Self-delta-pka	Nan	Nan
MEGREV	1	1	noZ	noQ4	noWater	0	Neutral	0	1-Neutral	-25.68	Self-delta-pka	Nan	Nan
NAHVEY	1	1	noZ	noQ4	noWater	0	Neutral	0	1-Neutral	-25.68	Self-delta-pka	Nan	Nan
EBUTUT	1	1	noZ	noQ4	noWater	0	Neutral	0	1-Neutral	-25.67	Self-delta-pka	Nan	Nan
JUBLUP	1	1	noZ	noQ4	noWater	0	Neutral	0	1-Neutral	-25.67	Self-delta-pka	Nan	Nan
FEJSES	1	1	noZ	noQ4	noWater	0	Neutral	0	1-Neutral	-25.67	Self-delta-pka	Nan	Nan
SUPROL	1	1	noZ	noQ4	noWater	0	Neutral	0	1-Neutral	-25.67	Self-delta-pka	Nan	Nan
LABDUQ	1	1	noZ	noQ4	noWater	0	Neutral	0	1-Neutral	-25.66	Self-delta-pka	Nan	Nan
YOJXIG	1	1	noZ	noQ4	noWater	0	Neutral	0	1-Neutral	-25.66	Self-delta-pka	-26.91	Self-delta-pka
BEBWEK	1	1	noZ	noQ4	noWater	0	Neutral	0	1-Neutral	-25.66	Self-delta-pka	Nan	Nan
CEFYUI	1	1	noZ	noQ4	noWater	0	Neutral	0	1-Neutral	-25.66	Self-delta-pka	Nan	Nan
MISXUH	1	1	noZ	noQ4	noWater	0	Neutral	0	1-Neutral	-25.66	Self-delta-pka	Nan	Nan
VAXCUS	1	1	noZ	noQ4	noWater	0	Neutral	0	1-Neutral	-25.66	Self-delta-pka	Nan	Nan
MOHTOS	2	1	noZ	noQ4	noWater	1	Neutral	0	1-N_1-Solvate_	-25.66	Self-delta-pka	Nan	Nan
QOLQIS	1	1	noZ	noQ4	noWater	0	Neutral	0	1-Neutral	-25.66	Self-delta-pka	-27.42	Self-delta-pka
PADCAY	1	1	noZ	noQ4	noWater	0	Neutral	0	1-Neutral	-25.65	Self-delta-pka	-27.41	Self-delta-pka
AXBRPO	1	1	noZ	noQ4	noWater	0	Neutral	0	1-Neutral	-25.65	Self-delta-pka	Nan	Nan
AXESAZ	1	1	noZ	noQ4	noWater	0	Neutral	0	1-Neutral	-25.65	Self-delta-pka	Nan	Nan
BRHSNT	1	1	noZ	noQ4	noWater	0	Neutral	0	1-Neutral	-25.65	Self-delta-pka	Nan	Nan
CIZGAT	1	1	noZ	noQ4	noWater	0	Neutral	0	1-Neutral	-25.65	Self-delta-pka	Nan	Nan
MBXKAN10	1	1	noZ	noQ4	noWater	0	Neutral	0	1-Neutral	-25.65	Self-delta-pka	Nan	Nan
QANVIL	1	1	noZ	noQ4	noWater	0	Neutral	0	1-Neutral	-25.65	Self-delta-pka	Nan	Nan
ZOKWUR	1	1	noZ	noQ4	noWater	0	Neutral	0	1-Neutral	-25.65	Self-delta-pka	Nan	Nan
CBZSOX10	1	1	noZ	noQ4	noWater	0	Neutral	0	1-Neutral	-25.64	Self-delta-pka	Nan	Nan
DOPFAQ	1	1	noZ	noQ4	noWater	0	Neutral	0	1-Neutral	-25.64	Self-delta-pka	Nan	Nan
HANGIO	1	1	noZ	noQ4	noWater	0	Neutral	0	1-Neutral	-25.64	Self-delta-pka	Nan	Nan
LIWWUJ	1	1	noZ	noQ4	noWater	0	Neutral	0	1-Neutral	-25.64	Self-delta-pka	Nan	Nan
NUMVUM	1	1	noZ	noQ4	noWater	0	Neutral	0	1-Neutral	-25.64	Self-delta-pka	Nan	Nan
QEBLAM	1	1	noZ	noQ4	noWater	0	Neutral	0	1-Neutral	-25.64	Self-delta-pka	Nan	Nan
YIDHOK	1	1	noZ	noQ4	noWater	0	Neutral	0	1-Neutral	-25.63	Self-delta-pka	-26.83	Self-delta-pka
JODCUC	1	1	noZ	noQ4	noWater	0	Neutral	0	1-Neutral	-25.63	Self-delta-pka	Nan	Nan
MENBEP	1	1	noZ	noQ4	noWater	0	Neutral	0	1-Neutral	-25.63	Self-delta-pka	Nan	Nan
MOCZEL	1	1	noZ	noQ4	noWater	0	Neutral	0	1-Neutral	-25.63	Self-delta-pka	Nan	Nan
FACWUD	2	1	noZ	noQ4	Water	0	Neutral	0	1-N__Hydrate	-25.63	Self-delta-pka	Nan	Nan
EKUYAN	1	1	noZ	noQ4	noWater	0	Neutral	0	1-Neutral	-25.62	Self-delta-pka	Nan	Nan
FEXZIR	1	1	noZ	noQ4	noWater	0	Neutral	0	1-Neutral	-25.62	Self-delta-pka	Nan	Nan
PAWNEJ	1	1	noZ	noQ4	noWater	0	Neutral	0	1-Neutral	-25.62	Self-delta-pka	Nan	Nan
COVKED	1	1	noZ	noQ4	noWater	0	Neutral	0	1-Neutral	-25.62	Self-delta-pka	Nan	Nan
TIYDAI	1	1	noZ	noQ4	noWater	0	Neutral	0	1-Neutral	-25.62	Self-delta-pka	Nan	Nan
ALAYOC	1	1	noZ	noQ4	noWater	0	Neutral	0	1-Neutral	-25.61	Self-delta-pka	Nan	Nan
EMISEA	1	1	noZ	noQ4	noWater	0	Neutral	0	1-Neutral	-25.61	Self-delta-pka	Nan	Nan
EMISIE	1	1	noZ	noQ4	noWater	0	Neutral	0	1-Neutral	-25.61	Self-delta-pka	Nan	Nan
ETUWIZ	1	1	noZ	noQ4	noWater	0	Neutral	0	1-Neutral	-25.61	Self-delta-pka	Nan	Nan
MABQEM	1	1	noZ	noQ4	noWater	0	Neutral	0	1-Neutral	-25.61	Self-delta-pka	Nan	Nan
MOTPOA	1	1	noZ	noQ4	noWater	0	Neutral	0	1-Neutral	-25.61	Self-delta-pka	Nan	Nan
YACQUO	1	1	noZ	noQ4	noWater	0	Neutral	0	1-Neutral	-25.61	Self-delta-pka	Nan	Nan
YEHBUI	1	1	noZ	noQ4	noWater	0	Neutral	0	1-Neutral	-25.61	Self-delta-pka	Nan	Nan
HIWPIP	1	1	noZ	noQ4	noWater	0	Neutral	0	1-Neutral	-25.6	Self-delta-pka	-27.36	Self-delta-pka
ROKPUD	1	1	noZ	noQ4	noWater	0	Neutral	0	1-Neutral	-25.6	Self-delta-pka	-27.36	Self-delta-pka
VIMLAF	1	1	noZ	noQ4	noWater	0	Neutral	0	1-Neutral	-25.6	Self-delta-pka	-27.36	Self-delta-pka
BOHFAH	1	1	noZ	noQ4	noWater	0	Neutral	0	1-Neutral	-25.59	Self-delta-pka	Nan	Nan
FORWIU	1	1	noZ	noQ4	noWater	0	Neutral	0	1-Neutral	-25.59	Self-delta-pka	Nan	Nan
PEJQOM	1	1	noZ	noQ4	noWater	0	Neutral	0	1-Neutral	-25.59	Self-delta-pka	Nan	Nan
ZAJNON	1	1	noZ	noQ4	noWater	0	Neutral	0	1-Neutral	-25.59	Self-delta-pka	Nan	Nan
ZENQIS	1	1	noZ	noQ4	noWater	0	Neutral	0	1-Neutral	-25.59	Self-delta-pka	-27.35	Self-delta-pka
HUXJAM	1	1	noZ	noQ4	noWater	0	Neutral	0	1-Neutral	-25.59	Self-delta-pka	Nan	Nan
JUQHUA	1	1	noZ	noQ4	noWater	0	Neutral	0	1-Neutral	-25.59	Self-delta-pka	Nan	Nan
PAGKAJ	1	1	noZ	noQ4	noWater	0	Neutral	0	1-Neutral	-25.59	Self-delta-pka	Nan	Nan
XAZVUR	1	1	noZ	noQ4	noWater	0	Neutral	0	1-Neutral	-25.59	Self-delta-pka	Nan	Nan
KATXUA	1	1	noZ	noQ4	noWater	0	Neutral	0	1-Neutral	-25.58	Self-delta-pka	-26.85	Self-delta-pka
XABCEM	1	1	noZ	noQ4	noWater	0	Neutral	0	1-Neutral	-25.58	Self-delta-pka	Nan	Nan
IMUTOZ	1	1	noZ	noQ4	noWater	0	Neutral	0	1-Neutral	-25.58	Self-delta-pka	Nan	Nan
TEXFOU	1	1	noZ	noQ4	noWater	0	Neutral	0	1-Neutral	-25.58	Self-delta-pka	Nan	Nan
YOCFOO	1	1	noZ	noQ4	noWater	0	Neutral	0	1-Neutral	-25.58	Self-delta-pka	Nan	Nan
ZOZRAH	1	1	noZ	noQ4	noWater	0	Neutral	0	1-Neutral	-25.58	Self-delta-pka	Nan	Nan
BIBMOP	1	1	noZ	noQ4	noWater	0	Neutral	0	1-Neutral	-25.58	Self-delta-pka	Nan	Nan
EVIHAS	1	1	noZ	noQ4	noWater	0	Neutral	0	1-Neutral	-25.58	Self-delta-pka	Nan	Nan
NSBTOB	1	1	noZ	noQ4	noWater	0	Neutral	0	1-Neutral	-25.58	Self-delta-pka	Nan	Nan
ABIPIM	1	1	noZ	noQ4	noWater	0	Neutral	0	1-Neutral	-25.57	Self-delta-pka	Nan	Nan
ASIGIS	1	1	noZ	noQ4	noWater	0	Neutral	0	1-Neutral	-25.57	Self-delta-pka	Nan	Nan
EABZTH01	1	1	noZ	noQ4	noWater	0	Neutral	0	1-Neutral	-25.57	Self-delta-pka	Nan	Nan
FONCIV	1	1	noZ	noQ4	noWater	0	Neutral	0	1-Neutral	-25.57	Self-delta-pka	Nan	Nan
HOGMAU	1	1	noZ	noQ4	noWater	0	Neutral	0	1-Neutral	-25.57	Self-delta-pka	Nan	Nan
IDISAQ	1	1	noZ	noQ4	noWater	0	Neutral	0	1-Neutral	-25.57	Self-delta-pka	Nan	Nan
IFILIS	1	1	noZ	noQ4	noWater	0	Neutral	0	1-Neutral	-25.57	Self-delta-pka	Nan	Nan
RIZPAT	1	1	noZ	noQ4	noWater	0	Neutral	0	1-Neutral	-25.57	Self-delta-pka	Nan	Nan
TEHHET	1	1	noZ	noQ4	noWater	0	Neutral	0	1-Neutral	-25.57	Self-delta-pka	Nan	Nan
XENPIP	1	1	noZ	noQ4	noWater	0	Neutral	0	1-Neutral	-25.56	Self-delta-pka	-26.76	Self-delta-pka
BRSANU	1	1	noZ	noQ4	noWater	0	Neutral	0	1-Neutral	-25.56	Self-delta-pka	Nan	Nan
HEVMON	1	1	noZ	noQ4	noWater	0	Neutral	0	1-Neutral	-25.56	Self-delta-pka	Nan	Nan
NSBTOA	1	1	noZ	noQ4	noWater	0	Neutral	0	1-Neutral	-25.56	Self-delta-pka	Nan	Nan
WIYQUR	1	1	noZ	noQ4	noWater	0	Neutral	0	1-Neutral	-25.56	Self-delta-pka	Nan	Nan
AZEKIB	1	1	noZ	noQ4	noWater	0	Neutral	0	1-Neutral	-25.56	Self-delta-pka	Nan	Nan
GAGSIR03	1	1	noZ	noQ4	noWater	0	Neutral	0	1-Neutral	-25.56	Self-delta-pka	Nan	Nan
GAGSIR05	1	1	noZ	noQ4	noWater	0	Neutral	0	1-Neutral	-25.56	Self-delta-pka	Nan	Nan
INEPAS	1	1	noZ	noQ4	noWater	0	Neutral	0	1-Neutral	-25.56	Self-delta-pka	Nan	Nan
IVENAZ	1	1	noZ	noQ4	noWater	0	Neutral	0	1-Neutral	-25.56	Self-delta-pka	Nan	Nan
TUXFAU	1	1	noZ	noQ4	noWater	0	Neutral	0	1-Neutral	-25.56	Self-delta-pka	Nan	Nan
CUFRAW	1	1	noZ	noQ4	noWater	0	Neutral	0	1-Neutral	-25.55	Self-delta-pka	Nan	Nan
DIMQUN	1	1	noZ	noQ4	noWater	0	Neutral	0	1-Neutral	-25.55	Self-delta-pka	Nan	Nan
WIYRAY	1	1	noZ	noQ4	noWater	0	Neutral	0	1-Neutral	-25.55	Self-delta-pka	Nan	Nan
ZETZOQ	1	1	noZ	noQ4	noWater	0	Neutral	0	1-Neutral	-25.55	Self-delta-pka	Nan	Nan
BARWID	1	1	noZ	noQ4	noWater	0	Neutral	0	1-Neutral	-25.55	Self-delta-pka	Nan	Nan
QOMGOR	1	1	noZ	noQ4	noWater	0	Neutral	0	1-Neutral	-25.55	Self-delta-pka	Nan	Nan
ATUMIL	1	1	noZ	noQ4	noWater	0	Neutral	0	1-Neutral	-25.54	Self-delta-pka	-26.61	Self-delta-pka
ROPVEA	1	1	noZ	noQ4	noWater	0	Neutral	0	1-Neutral	-25.54	Self-delta-pka	-26.61	Self-delta-pka
CIMXOM	1	1	noZ	noQ4	noWater	0	Neutral	0	1-Neutral	-25.54	Self-delta-pka	Nan	Nan
DELMIT	1	1	noZ	noQ4	noWater	0	Neutral	0	1-Neutral	-25.54	Self-delta-pka	Nan	Nan
KEYMAD	1	1	noZ	noQ4	noWater	0	Neutral	0	1-Neutral	-25.54	Self-delta-pka	Nan	Nan
LEFNUI	1	1	noZ	noQ4	noWater	0	Neutral	0	1-Neutral	-25.54	Self-delta-pka	Nan	Nan
QIYGAH	1	1	noZ	noQ4	noWater	0	Neutral	0	1-Neutral	-25.54	Self-delta-pka	Nan	Nan
HIXVIT	1	1	noZ	noQ4	noWater	0	Neutral	0	1-Neutral	-25.53	Self-delta-pka	-27.73	Self-delta-pka
XAKKAZ	1	1	noZ	noQ4	noWater	0	Neutral	0	1-Neutral	-25.53	Self-delta-pka	Nan	Nan
FEBPUA	1	1	noZ	noQ4	noWater	0	Neutral	0	1-Neutral	-25.53	Self-delta-pka	Nan	Nan
NAXDIB	1	1	noZ	noQ4	noWater	0	Neutral	0	1-Neutral	-25.53	Self-delta-pka	Nan	Nan
TULRNB	1	1	noZ	noQ4	noWater	0	Neutral	0	1-Neutral	-25.52	Self-delta-pka	Nan	Nan
XIMWAU	1	1	noZ	noQ4	noWater	0	Neutral	0	1-Neutral	-25.52	Self-delta-pka	Nan	Nan
ZEQSIA	1	1	noZ	noQ4	noWater	0	Neutral	0	1-Neutral	-25.52	Self-delta-pka	-27.28	Self-delta-pka
AXEFAL	1	1	noZ	noQ4	noWater	0	Neutral	0	1-Neutral	-25.52	Self-delta-pka	Nan	Nan
BOQWUZ	1	1	noZ	noQ4	noWater	0	Neutral	0	1-Neutral	-25.52	Self-delta-pka	Nan	Nan
LOVNAL	1	1	noZ	noQ4	noWater	0	Neutral	0	1-Neutral	-25.52	Self-delta-pka	Nan	Nan
TASZUJ	1	1	noZ	noQ4	noWater	0	Neutral	0	1-Neutral	-25.52	Self-delta-pka	Nan	Nan
BAWXAZ	1	1	noZ	noQ4	noWater	0	Neutral	0	1-Neutral	-25.51	Self-delta-pka	Nan	Nan
EXODOK	1	1	noZ	noQ4	noWater	0	Neutral	0	1-Neutral	-25.51	Self-delta-pka	Nan	Nan
FINGOZ	1	1	noZ	noQ4	noWater	0	Neutral	0	1-Neutral	-25.51	Self-delta-pka	Nan	Nan
ENAMUC	1	1	noZ	noQ4	noWater	0	Neutral	0	1-Neutral	-25.51	Self-delta-pka	Nan	Nan
JEGXID	1	1	noZ	noQ4	noWater	0	Neutral	0	1-Neutral	-25.51	Self-delta-pka	Nan	Nan
SEFCOX	1	1	noZ	noQ4	noWater	0	Neutral	0	1-Neutral	-25.51	Self-delta-pka	Nan	Nan
KOXDOS	1	1	noZ	noQ4	noWater	0	Neutral	0	1-Neutral	-25.5	Self-delta-pka	-26.57	Self-delta-pka
CERZUX	1	1	noZ	noQ4	noWater	0	Neutral	0	1-Neutral	-25.5	Self-delta-pka	Nan	Nan
GIHVUO	1	1	noZ	noQ4	noWater	0	Neutral	0	1-Neutral	-25.5	Self-delta-pka	Nan	Nan
GOLHIY	1	1	noZ	noQ4	noWater	0	Neutral	0	1-Neutral	-25.5	Self-delta-pka	Nan	Nan
IFOFIV	1	1	noZ	noQ4	noWater	0	Neutral	0	1-Neutral	-25.5	Self-delta-pka	Nan	Nan
KODPEB	1	1	noZ	noQ4	noWater	0	Neutral	0	1-Neutral	-25.5	Self-delta-pka	Nan	Nan
BAQNAI	1	1	noZ	noQ4	noWater	0	Neutral	0	1-Neutral	-25.49	Self-delta-pka	Nan	Nan
DASPAT	1	1	noZ	noQ4	noWater	0	Neutral	0	1-Neutral	-25.49	Self-delta-pka	Nan	Nan
NASYEM	1	1	noZ	noQ4	noWater	0	Neutral	0	1-Neutral	-25.49	Self-delta-pka	Nan	Nan
YOFTUL	1	1	noZ	noQ4	noWater	0	Neutral	0	1-Neutral	-25.49	Self-delta-pka	Nan	Nan
ZOBVER	1	1	noZ	noQ4	noWater	0	Neutral	0	1-Neutral	-25.49	Self-delta-pka	Nan	Nan
HIBDUT	1	1	noZ	noQ4	noWater	0	Neutral	0	1-Neutral	-25.49	Self-delta-pka	Nan	Nan
JUBJIZ	1	1	noZ	noQ4	noWater	0	Neutral	0	1-Neutral	-25.49	Self-delta-pka	Nan	Nan
POXQIC	1	1	noZ	noQ4	noWater	0	Neutral	0	1-Neutral	-25.49	Self-delta-pka	Nan	Nan
SOWMOI	1	1	noZ	noQ4	noWater	0	Neutral	0	1-Neutral	-25.49	Self-delta-pka	Nan	Nan
ZECQAB	1	1	noZ	noQ4	noWater	0	Neutral	0	1-Neutral	-25.49	Self-delta-pka	Nan	Nan
ACMEPT	1	1	noZ	noQ4	noWater	0	Neutral	0	1-Neutral	-25.48	Self-delta-pka	Nan	Nan
OYEPEP	1	1	noZ	noQ4	noWater	0	Neutral	0	1-Neutral	-25.48	Self-delta-pka	Nan	Nan
ESILEZ	2	1	noZ	noQ4	noWater	1	Neutral	0	1-N_1-Solvate_	-25.48	Self-delta-pka	Nan	Nan
HIBDON	1	1	noZ	noQ4	noWater	0	Neutral	0	1-Neutral	-25.48	Self-delta-pka	Nan	Nan
QUZTAH	1	1	noZ	noQ4	noWater	0	Neutral	0	1-Neutral	-25.48	Self-delta-pka	Nan	Nan
TUHZUR	1	1	noZ	noQ4	noWater	0	Neutral	0	1-Neutral	-25.48	Self-delta-pka	Nan	Nan
ZASPAK	1	1	noZ	noQ4	noWater	0	Neutral	0	1-Neutral	-25.47	Self-delta-pka	-28.31	Self-delta-pka
BAXHDO	1	1	noZ	noQ4	noWater	0	Neutral	0	1-Neutral	-25.47	Self-delta-pka	Nan	Nan
BIYZAK	1	1	noZ	noQ4	noWater	0	Neutral	0	1-Neutral	-25.47	Self-delta-pka	Nan	Nan
GEFMAG	1	1	noZ	noQ4	noWater	0	Neutral	0	1-Neutral	-25.47	Self-delta-pka	Nan	Nan
HERBIS	1	1	noZ	noQ4	noWater	0	Neutral	0	1-Neutral	-25.47	Self-delta-pka	Nan	Nan
KERFIW	1	1	noZ	noQ4	noWater	0	Neutral	0	1-Neutral	-25.47	Self-delta-pka	Nan	Nan
SABYAV	1	1	noZ	noQ4	noWater	0	Neutral	0	1-Neutral	-25.47	Self-delta-pka	Nan	Nan
BILKOY	1	1	noZ	noQ4	noWater	0	Neutral	0	1-Neutral	-25.46	Self-delta-pka	-26.51	Self-delta-pka
BILKUE	1	1	noZ	noQ4	noWater	0	Neutral	0	1-Neutral	-25.46	Self-delta-pka	-26.51	Self-delta-pka
CLCYHX	1	1	noZ	noQ4	noWater	0	Neutral	0	1-Neutral	-25.46	Self-delta-pka	Nan	Nan
LUXVUV	1	1	noZ	noQ4	noWater	0	Neutral	0	1-Neutral	-25.46	Self-delta-pka	Nan	Nan
QEKXUC	1	1	noZ	noQ4	noWater	0	Neutral	0	1-Neutral	-25.46	Self-delta-pka	Nan	Nan
TIGZIT	1	1	noZ	noQ4	noWater	0	Neutral	0	1-Neutral	-25.46	Self-delta-pka	Nan	Nan
VINYOI	2	2	noZ	noQ4	noWater	0	Neutral	0	2-N_	-25.46	Self-delta-pka	Nan	Nan
DIZNEI	1	1	noZ	noQ4	noWater	0	Neutral	0	1-Neutral	-25.45	Self-delta-pka	Nan	Nan
IQOLOQ	1	1	noZ	noQ4	noWater	0	Neutral	0	1-Neutral	-25.45	Self-delta-pka	Nan	Nan
KAQRAX	1	1	noZ	noQ4	noWater	0	Neutral	0	1-Neutral	-25.45	Self-delta-pka	Nan	Nan
OQAQON	1	1	noZ	noQ4	noWater	0	Neutral	0	1-Neutral	-25.45	Self-delta-pka	Nan	Nan
WEYCAE	1	1	noZ	noQ4	noWater	0	Neutral	0	1-Neutral	-25.45	Self-delta-pka	Nan	Nan
YOFTOF	1	1	noZ	noQ4	noWater	0	Neutral	0	1-Neutral	-25.45	Self-delta-pka	Nan	Nan
ZISWUV	1	1	noZ	noQ4	noWater	0	Neutral	0	1-Neutral	-25.45	Self-delta-pka	Nan	Nan
ZITDUD	1	1	noZ	noQ4	noWater	0	Neutral	0	1-Neutral	-25.45	Self-delta-pka	Nan	Nan
CAZWUY	1	1	noZ	noQ4	noWater	0	Neutral	0	1-Neutral	-25.45	Self-delta-pka	-26.56	Self-delta-pka
ABOFEF	1	1	noZ	noQ4	noWater	0	Neutral	0	1-Neutral	-25.45	Self-delta-pka	Nan	Nan
JAGHOO	1	1	noZ	noQ4	noWater	0	Neutral	0	1-Neutral	-25.45	Self-delta-pka	Nan	Nan
MUZBEO	1	1	noZ	noQ4	noWater	0	Neutral	0	1-Neutral	-25.45	Self-delta-pka	Nan	Nan
PAWPEJ	1	1	noZ	noQ4	noWater	0	Neutral	0	1-Neutral	-25.45	Self-delta-pka	Nan	Nan
WIZJOF	1	1	noZ	noQ4	noWater	0	Neutral	0	1-Neutral	-25.45	Self-delta-pka	Nan	Nan
DKMORP10	1	1	noZ	noQ4	noWater	0	Neutral	0	1-Neutral	-25.44	Self-delta-pka	Nan	Nan
IJAFAA	1	1	noZ	noQ4	noWater	0	Neutral	0	1-Neutral	-25.44	Self-delta-pka	Nan	Nan
IJAFEE	1	1	noZ	noQ4	noWater	0	Neutral	0	1-Neutral	-25.44	Self-delta-pka	Nan	Nan
SIZFOY	1	1	noZ	noQ4	noWater	0	Neutral	0	1-Neutral	-25.44	Self-delta-pka	Nan	Nan
TABBEE	1	1	noZ	noQ4	noWater	0	Neutral	0	1-Neutral	-25.44	Self-delta-pka	Nan	Nan
KIHZUX	1	1	noZ	noQ4	noWater	0	Neutral	0	1-Neutral	-25.44	Self-delta-pka	Nan	Nan
ATUMEH	1	1	noZ	noQ4	noWater	0	Neutral	0	1-Neutral	-25.43	Self-delta-pka	-26.45	Self-delta-pka
CADMAW	1	1	noZ	noQ4	noWater	0	Neutral	0	1-Neutral	-25.43	Self-delta-pka	Nan	Nan
LOVNEP	1	1	noZ	noQ4	noWater	0	Neutral	0	1-Neutral	-25.43	Self-delta-pka	Nan	Nan
REYCII	1	1	noZ	noQ4	noWater	0	Neutral	0	1-Neutral	-25.43	Self-delta-pka	Nan	Nan
REZTOG	1	1	noZ	noQ4	noWater	0	Neutral	0	1-Neutral	-25.43	Self-delta-pka	Nan	Nan
RILXOZ	1	1	noZ	noQ4	noWater	0	Neutral	0	1-Neutral	-25.43	Self-delta-pka	Nan	Nan
SETBAV	1	1	noZ	noQ4	noWater	0	Neutral	0	1-Neutral	-25.43	Self-delta-pka	Nan	Nan
YEQBUR	1	1	noZ	noQ4	noWater	0	Neutral	0	1-Neutral	-25.42	Self-delta-pka	-27.31	Self-delta-pka
AXBBEY	1	1	noZ	noQ4	noWater	0	Neutral	0	1-Neutral	-25.42	Self-delta-pka	-26.8	Self-delta-pka
YUKTUT	1	1	noZ	noQ4	noWater	0	Neutral	0	1-Neutral	-25.42	Self-delta-pka	-26.37	Self-delta-pka
FACQOR	1	1	noZ	noQ4	noWater	0	Neutral	0	1-Neutral	-25.42	Self-delta-pka	Nan	Nan
JAPVAX	1	1	noZ	noQ4	noWater	0	Neutral	0	1-Neutral	-25.42	Self-delta-pka	Nan	Nan
SABXUO	1	1	noZ	noQ4	noWater	0	Neutral	0	1-Neutral	-25.42	Self-delta-pka	Nan	Nan
TATBAS	1	1	noZ	noQ4	noWater	0	Neutral	0	1-Neutral	-25.42	Self-delta-pka	Nan	Nan
WANPAC	1	1	noZ	noQ4	noWater	0	Neutral	0	1-Neutral	-25.42	Self-delta-pka	Nan	Nan
COPZOZ	1	1	noZ	noQ4	noWater	0	Neutral	0	1-Neutral	-25.42	Self-delta-pka	Nan	Nan
ISOTOZ	1	1	noZ	noQ4	noWater	0	Neutral	0	1-Neutral	-25.42	Self-delta-pka	Nan	Nan
KELCAH	1	1	noZ	noQ4	noWater	0	Neutral	0	1-Neutral	-25.42	Self-delta-pka	Nan	Nan
GIRQEF	1	1	noZ	noQ4	noWater	0	Neutral	0	1-Neutral	-25.41	Self-delta-pka	-26.78	Self-delta-pka
IJUTOX01	1	1	noZ	noQ4	noWater	0	Neutral	0	1-Neutral	-25.41	Self-delta-pka	Nan	Nan
LIHBAI	1	1	noZ	noQ4	noWater	0	Neutral	0	1-Neutral	-25.41	Self-delta-pka	Nan	Nan
MURTEY	1	1	noZ	noQ4	noWater	0	Neutral	0	1-Neutral	-25.41	Self-delta-pka	Nan	Nan
WANYIW	1	1	noZ	noQ4	noWater	0	Neutral	0	1-Neutral	-25.41	Self-delta-pka	Nan	Nan
WOYWUC	1	1	noZ	noQ4	noWater	0	Neutral	0	1-Neutral	-25.41	Self-delta-pka	-29.09	Self-delta-pka
WIJWOE	1	1	noZ	noQ4	noWater	0	Neutral	0	1-Neutral	-25.41	Self-delta-pka	Nan	Nan
HODZUX01	1	1	noZ	noQ4	noWater	0	Neutral	0	1-Neutral	-25.4	Self-delta-pka	-26.77	Self-delta-pka
VERMIC	1	1	noZ	noQ4	noWater	0	Neutral	0	1-Neutral	-25.4	Self-delta-pka	-26.53	Self-delta-pka
EVIHEX	1	1	noZ	noQ4	noWater	0	Neutral	0	1-Neutral	-25.4	Self-delta-pka	Nan	Nan
MESKUR	1	1	noZ	noQ4	noWater	0	Neutral	0	1-Neutral	-25.4	Self-delta-pka	Nan	Nan
MIWYAS	1	1	noZ	noQ4	noWater	0	Neutral	0	1-Neutral	-25.4	Self-delta-pka	Nan	Nan
HAMJAI	1	1	noZ	noQ4	noWater	0	Neutral	0	1-Neutral	-25.4	Self-delta-pka	Nan	Nan
HITBUJ	1	1	noZ	noQ4	noWater	0	Neutral	0	1-Neutral	-25.4	Self-delta-pka	Nan	Nan
LIGZUZ	1	1	noZ	noQ4	noWater	0	Neutral	0	1-Neutral	-25.4	Self-delta-pka	Nan	Nan
LIHBEM	1	1	noZ	noQ4	noWater	0	Neutral	0	1-Neutral	-25.4	Self-delta-pka	Nan	Nan
NAZSOW	1	1	noZ	noQ4	noWater	0	Neutral	0	1-Neutral	-25.4	Self-delta-pka	Nan	Nan
NAZSUC	1	1	noZ	noQ4	noWater	0	Neutral	0	1-Neutral	-25.4	Self-delta-pka	Nan	Nan
OYALOQ	1	1	noZ	noQ4	noWater	0	Neutral	0	1-Neutral	-25.4	Self-delta-pka	Nan	Nan
OZATOA	1	1	noZ	noQ4	noWater	0	Neutral	0	1-Neutral	-25.4	Self-delta-pka	Nan	Nan
RITXEA	1	1	noZ	noQ4	noWater	0	Neutral	0	1-Neutral	-25.4	Self-delta-pka	Nan	Nan
HEYYIT	1	1	noZ	noQ4	noWater	0	Neutral	0	1-Neutral	-25.39	Self-delta-pka	Nan	Nan
JIBYAX	1	1	noZ	noQ4	noWater	0	Neutral	0	1-Neutral	-25.39	Self-delta-pka	Nan	Nan
LALLAN	1	1	noZ	noQ4	noWater	0	Neutral	0	1-Neutral	-25.39	Self-delta-pka	Nan	Nan
MUTDUB	1	1	noZ	noQ4	noWater	0	Neutral	0	1-Neutral	-25.39	Self-delta-pka	Nan	Nan
BUWBEB	1	1	noZ	noQ4	noWater	0	Neutral	0	1-Neutral	-25.38	Self-delta-pka	Nan	Nan
HIBFUV	1	1	noZ	noQ4	noWater	0	Neutral	0	1-Neutral	-25.38	Self-delta-pka	Nan	Nan
XIVBEK	1	1	noZ	noQ4	noWater	0	Neutral	0	1-Neutral	-25.38	Self-delta-pka	Nan	Nan
NIFCUD	1	1	noZ	noQ4	noWater	0	Neutral	0	1-Neutral	-25.37	Self-delta-pka	-26.41	Self-delta-pka
BETJEQ	1	1	noZ	noQ4	noWater	0	Neutral	0	1-Neutral	-25.37	Self-delta-pka	Nan	Nan
IFOGOC	1	1	noZ	noQ4	noWater	0	Neutral	0	1-Neutral	-25.37	Self-delta-pka	Nan	Nan
POGWAK	1	1	noZ	noQ4	noWater	0	Neutral	0	1-Neutral	-25.37	Self-delta-pka	Nan	Nan
CORDOE	1	1	noZ	noQ4	noWater	0	Neutral	0	1-Neutral	-25.37	Self-delta-pka	Nan	Nan
ZAQGEG	1	1	noZ	noQ4	noWater	0	Neutral	0	1-Neutral	-25.36	Self-delta-pka	Nan	Nan
XANXER	1	1	noZ	noQ4	noWater	0	Neutral	0	1-Neutral	-25.36	Self-delta-pka	Nan	Nan
BEGKEF	1	1	noZ	noQ4	noWater	0	Neutral	0	1-Neutral	-25.35	Self-delta-pka	Nan	Nan
PIXRET	1	1	noZ	noQ4	noWater	0	Neutral	0	1-Neutral	-25.35	Self-delta-pka	Nan	Nan
IREXIM	1	1	noZ	noQ4	noWater	0	Neutral	0	1-Neutral	-25.35	Self-delta-pka	-26.44	Self-delta-pka
AZUYUP	1	1	noZ	noQ4	noWater	0	Neutral	0	1-Neutral	-25.34	Self-delta-pka	Nan	Nan
NIFBAF	1	1	noZ	noQ4	noWater	0	Neutral	0	1-Neutral	-25.34	Self-delta-pka	Nan	Nan
ATOTEI	1	1	noZ	noQ4	noWater	0	Neutral	0	1-Neutral	-25.34	Self-delta-pka	Nan	Nan
BIBDAR	1	1	noZ	noQ4	noWater	0	Neutral	0	1-Neutral	-25.34	Self-delta-pka	Nan	Nan
DIPLOF	1	1	noZ	noQ4	noWater	0	Neutral	0	1-Neutral	-25.34	Self-delta-pka	Nan	Nan
GUDLAT	1	1	noZ	noQ4	noWater	0	Neutral	0	1-Neutral	-25.34	Self-delta-pka	Nan	Nan
IZAQAD	1	1	noZ	noQ4	noWater	0	Neutral	0	1-Neutral	-25.34	Self-delta-pka	Nan	Nan
JIXNUC	1	1	noZ	noQ4	noWater	0	Neutral	0	1-Neutral	-25.34	Self-delta-pka	Nan	Nan
VIGHOJ	1	1	noZ	noQ4	noWater	0	Neutral	0	1-Neutral	-25.34	Self-delta-pka	Nan	Nan
CELFII	1	1	noZ	noQ4	noWater	0	Neutral	0	1-Neutral	-25.33	Self-delta-pka	Nan	Nan
OPECUI	1	1	noZ	noQ4	noWater	0	Neutral	0	1-Neutral	-25.33	Self-delta-pka	Nan	Nan
POJYAQ	1	1	noZ	noQ4	noWater	0	Neutral	0	1-Neutral	-25.33	Self-delta-pka	Nan	Nan
YUJZOT	1	1	noZ	noQ4	noWater	0	Neutral	0	1-Neutral	-25.33	Self-delta-pka	Nan	Nan
CTBCHO	1	1	noZ	noQ4	noWater	0	Neutral	0	1-Neutral	-25.33	Self-delta-pka	Nan	Nan
IQAWAA	1	1	noZ	noQ4	noWater	0	Neutral	0	1-Neutral	-25.33	Self-delta-pka	Nan	Nan
IWUXII	1	1	noZ	noQ4	noWater	0	Neutral	0	1-Neutral	-25.33	Self-delta-pka	Nan	Nan
XASCAV	1	1	noZ	noQ4	noWater	0	Neutral	0	1-Neutral	-25.33	Self-delta-pka	Nan	Nan
LITDUQ	1	1	noZ	noQ4	noWater	0	Neutral	0	1-Neutral	-25.32	Self-delta-pka	-27.09	Self-delta-pka
COJXUV	1	1	noZ	noQ4	noWater	0	Neutral	0	1-Neutral	-25.32	Self-delta-pka	Nan	Nan
COJYAC	1	1	noZ	noQ4	noWater	0	Neutral	0	1-Neutral	-25.32	Self-delta-pka	Nan	Nan
QACZUP	1	1	noZ	noQ4	noWater	0	Neutral	0	1-Neutral	-25.32	Self-delta-pka	Nan	Nan
WIWDOV	1	1	noZ	noQ4	noWater	0	Neutral	0	1-Neutral	-25.32	Self-delta-pka	Nan	Nan
XIHSEO	1	1	noZ	noQ4	noWater	0	Neutral	0	1-Neutral	-25.32	Self-delta-pka	Nan	Nan
YASGEH	1	1	noZ	noQ4	noWater	0	Neutral	0	1-Neutral	-25.32	Self-delta-pka	Nan	Nan
GUPRUG	1	1	noZ	noQ4	noWater	0	Neutral	0	1-Neutral	-25.31	Self-delta-pka	Nan	Nan
LIZVEW	1	1	noZ	noQ4	noWater	0	Neutral	0	1-Neutral	-25.31	Self-delta-pka	Nan	Nan
OPIFEA	1	1	noZ	noQ4	noWater	0	Neutral	0	1-Neutral	-25.31	Self-delta-pka	Nan	Nan
TOHZEY	1	1	noZ	noQ4	noWater	0	Neutral	0	1-Neutral	-25.31	Self-delta-pka	Nan	Nan
FORWEQ	1	1	noZ	noQ4	noWater	0	Neutral	0	1-Neutral	-25.3	Self-delta-pka	Nan	Nan
YUJZIN	1	1	noZ	noQ4	noWater	0	Neutral	0	1-Neutral	-25.3	Self-delta-pka	Nan	Nan
ZAKQUX	1	1	noZ	noQ4	noWater	0	Neutral	0	1-Neutral	-25.3	Self-delta-pka	Nan	Nan
BABDUD	1	1	noZ	noQ4	noWater	0	Neutral	0	1-Neutral	-25.3	Self-delta-pka	Nan	Nan
TOCFAS	1	1	noZ	noQ4	noWater	0	Neutral	0	1-Neutral	-25.3	Self-delta-pka	Nan	Nan
SAGGAJ	1	1	noZ	noQ4	noWater	0	Neutral	0	1-Neutral	-25.29	Self-delta-pka	Nan	Nan
QARYAK	1	1	noZ	noQ4	noWater	0	Neutral	0	1-Neutral	-25.29	Self-delta-pka	-26.49	Self-delta-pka
AHEBUL	1	1	noZ	noQ4	noWater	0	Neutral	0	1-Neutral	-25.29	Self-delta-pka	Nan	Nan
CUQFAX	1	1	noZ	noQ4	noWater	0	Neutral	0	1-Neutral	-25.29	Self-delta-pka	Nan	Nan
EDOSUM	1	1	noZ	noQ4	noWater	0	Neutral	0	1-Neutral	-25.29	Self-delta-pka	Nan	Nan
IFILOY	1	1	noZ	noQ4	noWater	0	Neutral	0	1-Neutral	-25.29	Self-delta-pka	Nan	Nan
NABNAF	1	1	noZ	noQ4	noWater	0	Neutral	0	1-Neutral	-25.29	Self-delta-pka	Nan	Nan
NUKJOT	1	1	noZ	noQ4	noWater	0	Neutral	0	1-Neutral	-25.29	Self-delta-pka	Nan	Nan
UGUZIF	1	1	noZ	noQ4	noWater	0	Neutral	0	1-Neutral	-25.29	Self-delta-pka	Nan	Nan
HAKNEO	1	1	noZ	noQ4	noWater	0	Neutral	0	1-Neutral	-25.28	Self-delta-pka	Nan	Nan
SARFAS	1	1	noZ	noQ4	noWater	0	Neutral	0	1-Neutral	-25.28	Self-delta-pka	-26.9	Self-delta-pka
HIZGOO	1	1	noZ	noQ4	noWater	0	Neutral	0	1-Neutral	-25.28	Self-delta-pka	Nan	Nan
MINROQ	1	1	noZ	noQ4	noWater	0	Neutral	0	1-Neutral	-25.28	Self-delta-pka	Nan	Nan
HUWGIP	1	1	noZ	noQ4	noWater	0	Neutral	0	1-Neutral	-25.27	Self-delta-pka	Nan	Nan
NAMLUJ	1	1	noZ	noQ4	noWater	0	Neutral	0	1-Neutral	-25.27	Self-delta-pka	Nan	Nan
GEFLUA	1	1	noZ	noQ4	noWater	0	Neutral	0	1-Neutral	-25.27	Self-delta-pka	Nan	Nan
GUHDAP	1	1	noZ	noQ4	noWater	0	Neutral	0	1-Neutral	-25.27	Self-delta-pka	Nan	Nan
LAFRUH	1	1	noZ	noQ4	noWater	0	Neutral	0	1-Neutral	-25.27	Self-delta-pka	Nan	Nan
LUXWAC	1	1	noZ	noQ4	noWater	0	Neutral	0	1-Neutral	-25.27	Self-delta-pka	Nan	Nan
XODMIO	1	1	noZ	noQ4	noWater	0	Neutral	0	1-Neutral	-25.27	Self-delta-pka	Nan	Nan
TOCPAE	1	1	noZ	noQ4	noWater	0	Neutral	0	1-Neutral	-25.26	Self-delta-pka	Nan	Nan
DEQVUT	1	1	noZ	noQ4	noWater	0	Neutral	0	1-Neutral	-25.26	Self-delta-pka	Nan	Nan
HOFQUR	1	1	noZ	noQ4	noWater	0	Neutral	0	1-Neutral	-25.26	Self-delta-pka	Nan	Nan
HUCDIU	1	1	noZ	noQ4	noWater	0	Neutral	0	1-Neutral	-25.26	Self-delta-pka	Nan	Nan
BIVNAY	1	1	noZ	noQ4	noWater	0	Neutral	0	1-Neutral	-25.25	Self-delta-pka	-26.37	Self-delta-pka
EGIGAE	1	1	noZ	noQ4	noWater	0	Neutral	0	1-Neutral	-25.25	Self-delta-pka	Nan	Nan
JOKPUU	1	1	noZ	noQ4	noWater	0	Neutral	0	1-Neutral	-25.25	Self-delta-pka	Nan	Nan
LOKLAY	1	1	noZ	noQ4	noWater	0	Neutral	0	1-Neutral	-25.25	Self-delta-pka	Nan	Nan
VAPPEJ	1	1	noZ	noQ4	noWater	0	Neutral	0	1-Neutral	-25.25	Self-delta-pka	Nan	Nan
YOBXIX	1	1	noZ	noQ4	noWater	0	Neutral	0	1-Neutral	-25.25	Self-delta-pka	Nan	Nan
JEJJOX	1	1	noZ	noQ4	noWater	0	Neutral	0	1-Neutral	-25.24	Self-delta-pka	Nan	Nan
VENZAP	1	1	noZ	noQ4	noWater	0	Neutral	0	1-Neutral	-25.24	Self-delta-pka	Nan	Nan
KAKDEF	1	1	Zwit	Q4	noWater	0	Neutral	0	1-NeutralZQ4	-25.24	Self-delta-pka	Nan	Nan
BEYNID	1	1	noZ	noQ4	noWater	0	Neutral	0	1-Neutral	-25.24	Self-delta-pka	Nan	Nan
NUQYAA	1	1	noZ	noQ4	noWater	0	Neutral	0	1-Neutral	-25.24	Self-delta-pka	Nan	Nan
SEFCUD	1	1	noZ	noQ4	noWater	0	Neutral	0	1-Neutral	-25.24	Self-delta-pka	Nan	Nan
MOFXOW	1	1	noZ	noQ4	noWater	0	Neutral	0	1-Neutral	-25.23	Self-delta-pka	-26.23	Self-delta-pka
HELWAZ	1	1	noZ	noQ4	noWater	0	Neutral	0	1-Neutral	-25.23	Self-delta-pka	Nan	Nan
NIKVUZ	1	1	noZ	noQ4	noWater	0	Neutral	0	1-Neutral	-25.23	Self-delta-pka	Nan	Nan
NULJAH	1	1	noZ	noQ4	noWater	0	Neutral	0	1-Neutral	-25.23	Self-delta-pka	Nan	Nan
VOVHOD	1	1	noZ	noQ4	noWater	0	Neutral	0	1-Neutral	-25.23	Self-delta-pka	Nan	Nan
COFGIO	1	1	noZ	noQ4	noWater	0	Neutral	0	1-Neutral	-25.22	Self-delta-pka	Nan	Nan
JIHVIF	1	1	noZ	noQ4	noWater	0	Neutral	0	1-Neutral	-25.22	Self-delta-pka	Nan	Nan
JUZBUD	1	1	noZ	noQ4	noWater	0	Neutral	0	1-Neutral	-25.22	Self-delta-pka	Nan	Nan
LIJTEF	2	1	noZ	noQ4	noWater	1	Neutral	0	1-N_1-Solvate_	-25.22	Self-delta-pka	Nan	Nan
EJESIW	1	1	noZ	noQ4	noWater	0	Neutral	0	1-Neutral	-25.21	Self-delta-pka	Nan	Nan
MOZYOQ	1	1	noZ	noQ4	noWater	0	Neutral	0	1-Neutral	-25.21	Self-delta-pka	Nan	Nan
HILGOY	1	1	noZ	noQ4	noWater	0	Neutral	0	1-Neutral	-25.21	Self-delta-pka	Nan	Nan
KUPZIG	1	1	noZ	noQ4	noWater	0	Neutral	0	1-Neutral	-25.2	Self-delta-pka	Nan	Nan
MINSOT	1	1	noZ	noQ4	noWater	0	Neutral	0	1-Neutral	-25.2	Self-delta-pka	Nan	Nan
QAQQAA	1	1	noZ	noQ4	noWater	0	Neutral	0	1-Neutral	-25.2	Self-delta-pka	-26.65	Self-delta-pka
ABOFIJ	1	1	noZ	noQ4	noWater	0	Neutral	0	1-Neutral	-25.2	Self-delta-pka	Nan	Nan
EZAKIA	1	1	noZ	noQ4	noWater	0	Neutral	0	1-Neutral	-25.2	Self-delta-pka	Nan	Nan
BOQHOH	1	1	noZ	noQ4	noWater	0	Neutral	0	1-Neutral	-25.19	Self-delta-pka	Nan	Nan
SUHHEK	1	1	noZ	noQ4	noWater	0	Neutral	0	1-Neutral	-25.19	Self-delta-pka	Nan	Nan
YAHQUT	1	1	noZ	noQ4	noWater	0	Neutral	0	1-Neutral	-25.19	Self-delta-pka	Nan	Nan
CEQPOD	1	1	noZ	noQ4	noWater	0	Neutral	0	1-Neutral	-25.19	Self-delta-pka	Nan	Nan
PAVSIQ	1	1	noZ	noQ4	noWater	0	Neutral	0	1-Neutral	-25.19	Self-delta-pka	Nan	Nan
XIBNEC	1	1	noZ	noQ4	noWater	0	Neutral	0	1-Neutral	-25.19	Self-delta-pka	Nan	Nan
NOHQUY	1	1	noZ	noQ4	noWater	0	Neutral	0	1-Neutral	-25.18	Self-delta-pka	-26.56	Self-delta-pka
BAJRAF	1	1	noZ	noQ4	noWater	0	Neutral	0	1-Neutral	-25.18	Self-delta-pka	Nan	Nan
DIWHIB	1	1	noZ	noQ4	noWater	0	Neutral	0	1-Neutral	-25.18	Self-delta-pka	Nan	Nan
KIDZOO	1	1	noZ	noQ4	noWater	0	Neutral	0	1-Neutral	-25.18	Self-delta-pka	Nan	Nan
NOKKUU	1	1	noZ	noQ4	noWater	0	Neutral	0	1-Neutral	-25.18	Self-delta-pka	Nan	Nan
PEQFID	1	1	noZ	noQ4	noWater	0	Neutral	0	1-Neutral	-25.18	Self-delta-pka	Nan	Nan
QEBCUV	1	1	noZ	noQ4	noWater	0	Neutral	0	1-Neutral	-25.18	Self-delta-pka	Nan	Nan
TIYFAK	1	1	noZ	noQ4	noWater	0	Neutral	0	1-Neutral	-25.18	Self-delta-pka	Nan	Nan
UJAFER	1	1	noZ	noQ4	noWater	0	Neutral	0	1-Neutral	-25.18	Self-delta-pka	Nan	Nan
VENJED	1	1	Zwit	Q4	noWater	0	Neutral	0	1-NeutralZQ4	-25.18	Self-delta-pka	-27.06	Self-delta-pka
BEFWAL	1	1	noZ	noQ4	noWater	0	Neutral	0	1-Neutral	-25.17	Self-delta-pka	-26.97	Self-delta-pka
YOXDIY	1	1	noZ	noQ4	noWater	0	Neutral	0	1-Neutral	-25.17	Self-delta-pka	Nan	Nan
NUKZAW	1	1	noZ	noQ4	noWater	0	Neutral	0	1-Neutral	-25.17	Self-delta-pka	Nan	Nan
LEJSUR	1	1	noZ	noQ4	noWater	0	Neutral	0	1-Neutral	-25.16	Self-delta-pka	Nan	Nan
EKIQIB	1	1	noZ	noQ4	noWater	0	Neutral	0	1-Neutral	-25.16	Self-delta-pka	Nan	Nan
GUHDET	1	1	noZ	noQ4	noWater	0	Neutral	0	1-Neutral	-25.16	Self-delta-pka	Nan	Nan
KUNCON	1	1	noZ	noQ4	noWater	0	Neutral	0	1-Neutral	-25.16	Self-delta-pka	Nan	Nan
WAKKOJ	1	1	noZ	noQ4	noWater	0	Neutral	0	1-Neutral	-25.16	Self-delta-pka	Nan	Nan
UDABAD	1	1	Zwit	Q4	noWater	0	Neutral	0	1-NeutralZQ4	-25.16	Self-delta-pka	-27.17	Self-delta-pka
SUHGOT	2	1	noZ	noQ4	Water	0	Neutral	0	1-N__Hydrate	-25.16	Self-delta-pka	Nan	Nan
OJUZUR	1	1	noZ	noQ4	noWater	0	Neutral	0	1-Neutral	-25.16	Self-delta-pka	-27.23	Self-delta-pka
YISYUX	1	1	noZ	noQ4	noWater	0	Neutral	0	1-Neutral	-25.15	Self-delta-pka	Nan	Nan
AQOFER	1	1	noZ	noQ4	noWater	0	Neutral	0	1-Neutral	-25.15	Self-delta-pka	Nan	Nan
AVIVIM	1	1	noZ	noQ4	noWater	0	Neutral	0	1-Neutral	-25.15	Self-delta-pka	Nan	Nan
DEBTAH	1	1	noZ	noQ4	noWater	0	Neutral	0	1-Neutral	-25.15	Self-delta-pka	Nan	Nan
GELPIZ	1	1	noZ	noQ4	noWater	0	Neutral	0	1-Neutral	-25.15	Self-delta-pka	Nan	Nan
NIVKUZ	1	1	noZ	noQ4	noWater	0	Neutral	0	1-Neutral	-25.15	Self-delta-pka	Nan	Nan
ASAHAF	1	1	noZ	noQ4	noWater	0	Neutral	0	1-Neutral	-25.14	Self-delta-pka	Nan	Nan
KIDZUU	1	1	noZ	noQ4	noWater	0	Neutral	0	1-Neutral	-25.14	Self-delta-pka	Nan	Nan
QAQQEE	1	1	noZ	noQ4	noWater	0	Neutral	0	1-Neutral	-25.14	Self-delta-pka	Nan	Nan
TUJBAB	1	1	noZ	noQ4	noWater	0	Neutral	0	1-Neutral	-25.14	Self-delta-pka	Nan	Nan
FARLOC	1	1	noZ	noQ4	noWater	0	Neutral	0	1-Neutral	-25.13	Self-delta-pka	-26.18	Self-delta-pka
DASPAP	1	1	noZ	noQ4	noWater	0	Neutral	0	1-Neutral	-25.13	Self-delta-pka	Nan	Nan
WAFGIW	1	1	noZ	noQ4	noWater	0	Neutral	0	1-Neutral	-25.13	Self-delta-pka	Nan	Nan
WAFGOC	1	1	noZ	noQ4	noWater	0	Neutral	0	1-Neutral	-25.13	Self-delta-pka	Nan	Nan
WAFGUI	1	1	noZ	noQ4	noWater	0	Neutral	0	1-Neutral	-25.13	Self-delta-pka	Nan	Nan
BAXVAA	1	1	noZ	noQ4	noWater	0	Neutral	0	1-Neutral	-25.12	Self-delta-pka	Nan	Nan
POMWOE	1	1	noZ	noQ4	noWater	0	Neutral	0	1-Neutral	-25.12	Self-delta-pka	Nan	Nan
QULCAD	1	1	noZ	noQ4	noWater	0	Neutral	0	1-Neutral	-25.12	Self-delta-pka	Nan	Nan
TEFJUJ	1	1	noZ	noQ4	noWater	0	Neutral	0	1-Neutral	-25.12	Self-delta-pka	Nan	Nan
WIRDOQ	1	1	noZ	noQ4	noWater	0	Neutral	0	1-Neutral	-25.12	Self-delta-pka	-26.16	Self-delta-pka
UVECIJ	1	1	noZ	noQ4	noWater	0	Neutral	0	1-Neutral	-25.11	Self-delta-pka	-26.31	Self-delta-pka
COMHER	1	1	noZ	noQ4	noWater	0	Neutral	0	1-Neutral	-25.11	Self-delta-pka	Nan	Nan
FIYSEN	1	1	noZ	noQ4	noWater	0	Neutral	0	1-Neutral	-25.11	Self-delta-pka	Nan	Nan
KOLREK	1	1	noZ	noQ4	noWater	0	Neutral	0	1-Neutral	-25.11	Self-delta-pka	Nan	Nan
MEFHEM	1	1	noZ	noQ4	noWater	0	Neutral	0	1-Neutral	-25.11	Self-delta-pka	Nan	Nan
UHURIA	1	1	noZ	noQ4	noWater	0	Neutral	0	1-Neutral	-25.11	Self-delta-pka	Nan	Nan
XUHQEW	1	1	noZ	noQ4	noWater	0	Neutral	0	1-Neutral	-25.11	Self-delta-pka	Nan	Nan
WEBSED	1	1	noZ	noQ4	noWater	0	Neutral	0	1-Neutral	-25.11	Self-delta-pka	Nan	Nan
WIWZIN	1	1	noZ	noQ4	noWater	0	Neutral	0	1-Neutral	-25.1	Self-delta-pka	-26.48	Self-delta-pka
BEHNAE	1	1	noZ	noQ4	noWater	0	Neutral	0	1-Neutral	-25.1	Self-delta-pka	Nan	Nan
ERIYAG	1	1	noZ	noQ4	noWater	0	Neutral	0	1-Neutral	-25.1	Self-delta-pka	Nan	Nan
JOLKUS	1	1	noZ	noQ4	noWater	0	Neutral	0	1-Neutral	-25.1	Self-delta-pka	Nan	Nan
JOLLAZ	1	1	noZ	noQ4	noWater	0	Neutral	0	1-Neutral	-25.1	Self-delta-pka	Nan	Nan
MODDAN	1	1	noZ	noQ4	noWater	0	Neutral	0	1-Neutral	-25.1	Self-delta-pka	Nan	Nan
QOSZUU	1	1	noZ	noQ4	noWater	0	Neutral	0	1-Neutral	-25.1	Self-delta-pka	Nan	Nan
VABNET	1	1	noZ	noQ4	noWater	0	Neutral	0	1-Neutral	-25.1	Self-delta-pka	Nan	Nan
YUFNIW	1	1	noZ	noQ4	noWater	0	Neutral	0	1-Neutral	-25.1	Self-delta-pka	Nan	Nan
POJZOF	1	1	noZ	noQ4	noWater	0	Neutral	0	1-Neutral	-25.1	Self-delta-pka	-27.63	Self-delta-pka
BUBNUH	1	1	noZ	noQ4	noWater	0	Neutral	0	1-Neutral	-25.1	Self-delta-pka	-26.28	Self-delta-pka
LOHBUG	1	1	noZ	noQ4	noWater	0	Neutral	0	1-Neutral	-25.1	Self-delta-pka	Nan	Nan
XEWCOS	1	1	noZ	noQ4	noWater	0	Neutral	0	1-Neutral	-25.1	Self-delta-pka	Nan	Nan
YILJAE	1	1	noZ	noQ4	noWater	0	Neutral	0	1-Neutral	-25.1	Self-delta-pka	Nan	Nan
BALCOH	1	1	noZ	noQ4	noWater	0	Neutral	0	1-Neutral	-25.09	Self-delta-pka	Nan	Nan
GEBPUY	1	1	noZ	noQ4	noWater	0	Neutral	0	1-Neutral	-25.09	Self-delta-pka	Nan	Nan
ICOCAE	1	1	noZ	noQ4	noWater	0	Neutral	0	1-Neutral	-25.09	Self-delta-pka	Nan	Nan
LOWNAO	1	1	noZ	noQ4	noWater	0	Neutral	0	1-Neutral	-25.09	Self-delta-pka	Nan	Nan
DEFLEF	1	1	noZ	noQ4	noWater	0	Neutral	0	1-Neutral	-25.08	Self-delta-pka	Nan	Nan
DIQWEH	1	1	noZ	noQ4	noWater	0	Neutral	0	1-Neutral	-25.08	Self-delta-pka	Nan	Nan
MOXLOB	1	1	noZ	noQ4	noWater	0	Neutral	0	1-Neutral	-25.08	Self-delta-pka	Nan	Nan
OHIPUR	1	1	noZ	noQ4	noWater	0	Neutral	0	1-Neutral	-25.08	Self-delta-pka	Nan	Nan
PAXGUS	1	1	noZ	noQ4	noWater	0	Neutral	0	1-Neutral	-25.08	Self-delta-pka	Nan	Nan
QADBEC	1	1	noZ	noQ4	noWater	0	Neutral	0	1-Neutral	-25.08	Self-delta-pka	Nan	Nan
QADBIG	1	1	noZ	noQ4	noWater	0	Neutral	0	1-Neutral	-25.08	Self-delta-pka	Nan	Nan
YUZBUR	1	1	noZ	noQ4	noWater	0	Neutral	0	1-Neutral	-25.08	Self-delta-pka	Nan	Nan
FEQLOE	1	1	noZ	noQ4	noWater	0	Neutral	0	1-Neutral	-25.08	Self-delta-pka	Nan	Nan
GELXEA	1	1	noZ	noQ4	noWater	0	Neutral	0	1-Neutral	-25.08	Self-delta-pka	Nan	Nan
JIZGUU	1	1	noZ	noQ4	noWater	0	Neutral	0	1-Neutral	-25.08	Self-delta-pka	Nan	Nan
TIBLAR	1	1	noZ	noQ4	noWater	0	Neutral	0	1-Neutral	-25.08	Self-delta-pka	Nan	Nan
UVOPIF	1	1	noZ	noQ4	noWater	0	Neutral	0	1-Neutral	-25.08	Self-delta-pka	Nan	Nan
YAFKUL	1	1	noZ	noQ4	noWater	0	Neutral	0	1-Neutral	-25.08	Self-delta-pka	Nan	Nan
BEDFAT	1	1	noZ	noQ4	noWater	0	Neutral	0	1-Neutral	-25.07	Self-delta-pka	Nan	Nan
FEQLUK	1	1	noZ	noQ4	noWater	0	Neutral	0	1-Neutral	-25.07	Self-delta-pka	Nan	Nan
FUGFOC	1	1	noZ	noQ4	noWater	0	Neutral	0	1-Neutral	-25.07	Self-delta-pka	Nan	Nan
KEJFIQ	1	1	noZ	noQ4	noWater	0	Neutral	0	1-Neutral	-25.07	Self-delta-pka	Nan	Nan
ZBXPEN	1	1	noZ	noQ4	noWater	0	Neutral	0	1-Neutral	-25.07	Self-delta-pka	Nan	Nan
DEQVIH	1	1	noZ	noQ4	noWater	0	Neutral	0	1-Neutral	-25.06	Self-delta-pka	Nan	Nan
DOLXAD10	1	1	noZ	noQ4	noWater	0	Neutral	0	1-Neutral	-25.06	Self-delta-pka	Nan	Nan
YACCAG	1	1	noZ	noQ4	noWater	0	Neutral	0	1-Neutral	-25.06	Self-delta-pka	Nan	Nan
COKQUP	1	1	noZ	noQ4	noWater	0	Neutral	0	1-Neutral	-25.06	Self-delta-pka	Nan	Nan
MUDJAY	1	1	noZ	noQ4	noWater	0	Neutral	0	1-Neutral	-25.06	Self-delta-pka	Nan	Nan
QEWCAX	1	1	noZ	noQ4	noWater	0	Neutral	0	1-Neutral	-25.06	Self-delta-pka	Nan	Nan
VEZCUY	1	1	noZ	noQ4	noWater	0	Neutral	0	1-Neutral	-25.06	Self-delta-pka	Nan	Nan
GIHFOS	1	1	noZ	noQ4	noWater	0	Neutral	0	1-Neutral	-25.05	Self-delta-pka	Nan	Nan
GIQKOG	1	1	noZ	noQ4	noWater	0	Neutral	0	1-Neutral	-25.05	Self-delta-pka	Nan	Nan
HOXTAQ	1	1	noZ	noQ4	noWater	0	Neutral	0	1-Neutral	-25.05	Self-delta-pka	Nan	Nan
HOXTIY	1	1	noZ	noQ4	noWater	0	Neutral	0	1-Neutral	-25.05	Self-delta-pka	Nan	Nan
MIVZIB	1	1	noZ	noQ4	noWater	0	Neutral	0	1-Neutral	-25.05	Self-delta-pka	Nan	Nan
MIYHEI	1	1	noZ	noQ4	noWater	0	Neutral	0	1-Neutral	-25.05	Self-delta-pka	Nan	Nan
PIJRUX	1	1	noZ	noQ4	noWater	0	Neutral	0	1-Neutral	-25.05	Self-delta-pka	Nan	Nan
ZAYBAF	1	1	noZ	noQ4	noWater	0	Neutral	0	1-Neutral	-25.05	Self-delta-pka	-26.25	Self-delta-pka
IFODOX	1	1	noZ	noQ4	noWater	0	Neutral	0	1-Neutral	-25.05	Self-delta-pka	Nan	Nan
PATZOC	1	1	noZ	noQ4	noWater	0	Neutral	0	1-Neutral	-25.05	Self-delta-pka	Nan	Nan
SOGSIT	1	1	noZ	noQ4	noWater	0	Neutral	0	1-Neutral	-25.05	Self-delta-pka	Nan	Nan
YOWNUV	1	1	noZ	noQ4	noWater	0	Neutral	0	1-Neutral	-25.05	Self-delta-pka	Nan	Nan
YEFMIH	1	1	noZ	noQ4	noWater	0	Neutral	0	1-Neutral	-25.05	Self-delta-pka	Nan	Nan
SOYLUO	1	1	noZ	noQ4	noWater	0	Neutral	0	1-Neutral	-25.04	Self-delta-pka	Nan	Nan
VIKSEN	1	1	noZ	noQ4	noWater	0	Neutral	0	1-Neutral	-25.04	Self-delta-pka	Nan	Nan
HOLXAK	1	1	noZ	noQ4	noWater	0	Neutral	0	1-Neutral	-25.03	Self-delta-pka	Nan	Nan
KECHUW	1	1	noZ	noQ4	noWater	0	Neutral	0	1-Neutral	-25.03	Self-delta-pka	Nan	Nan
LIRKEE	1	1	noZ	noQ4	noWater	0	Neutral	0	1-Neutral	-25.03	Self-delta-pka	Nan	Nan
LIRKII	1	1	noZ	noQ4	noWater	0	Neutral	0	1-Neutral	-25.03	Self-delta-pka	Nan	Nan
CURTEP	1	1	Zwit	Q4	noWater	0	Neutral	0	1-NeutralZQ4	-25.03	Self-delta-pka	Nan	Nan
GELPOF	1	1	noZ	noQ4	noWater	0	Neutral	0	1-Neutral	-25.03	Self-delta-pka	Nan	Nan
LALYIJ	1	1	noZ	noQ4	noWater	0	Neutral	0	1-Neutral	-25.02	Self-delta-pka	Nan	Nan
ROMBOL	1	1	noZ	noQ4	noWater	0	Neutral	0	1-Neutral	-25.02	Self-delta-pka	-26.3	Self-delta-pka
IDIGAG	1	1	noZ	noQ4	noWater	0	Neutral	0	1-Neutral	-25.02	Self-delta-pka	Nan	Nan
SAWXEV	1	1	noZ	noQ4	noWater	0	Neutral	0	1-Neutral	-25.02	Self-delta-pka	Nan	Nan
REVPOY	1	1	noZ	noQ4	noWater	0	Neutral	0	1-Neutral	-25.01	Self-delta-pka	-26.52	Self-delta-pka
GAHJAA	1	1	noZ	noQ4	noWater	0	Neutral	0	1-Neutral	-25.01	Self-delta-pka	Nan	Nan
JUSQUL	1	1	noZ	noQ4	noWater	0	Neutral	0	1-Neutral	-25.01	Self-delta-pka	-25.88	Self-delta-pka
NOHRAF	1	1	noZ	noQ4	noWater	0	Neutral	0	1-Neutral	-25.01	Self-delta-pka	Nan	Nan
TEFHAQ	1	1	noZ	noQ4	noWater	0	Neutral	0	1-Neutral	-25.01	Self-delta-pka	Nan	Nan
TEFHEU	1	1	noZ	noQ4	noWater	0	Neutral	0	1-Neutral	-25.01	Self-delta-pka	Nan	Nan
WEQQUE	1	1	noZ	noQ4	noWater	0	Neutral	0	1-Neutral	-25.01	Self-delta-pka	Nan	Nan
IQANIZ	2	1	noZ	noQ4	Water	0	Neutral	0	1-N__Hydrate	-25.01	Self-delta-pka	Nan	Nan
NACHOO	1	1	noZ	noQ4	noWater	0	Neutral	0	1-Neutral	-25	Self-delta-pka	Nan	Nan
NOXZOR	1	1	noZ	noQ4	noWater	0	Neutral	0	1-Neutral	-25	Self-delta-pka	Nan	Nan
VOHLUA	1	1	noZ	noQ4	noWater	0	Neutral	0	1-Neutral	-25	Self-delta-pka	Nan	Nan
VOHMEL	2	1	noZ	noQ4	noWater	1	Neutral	0	1-N_1-Solvate_	-25	Self-delta-pka	Nan	Nan
EACLOJ	1	1	noZ	noQ4	noWater	0	Neutral	0	1-Neutral	-24.99	Self-delta-pka	Nan	Nan
TOJZIC	1	1	noZ	noQ4	noWater	0	Neutral	0	1-Neutral	-24.99	Self-delta-pka	Nan	Nan
TORVEC	1	1	noZ	noQ4	noWater	0	Neutral	0	1-Neutral	-24.99	Self-delta-pka	Nan	Nan
XIMVUN	1	1	noZ	noQ4	noWater	0	Neutral	0	1-Neutral	-24.99	Self-delta-pka	Nan	Nan
BAZLET	1	1	noZ	noQ4	noWater	0	Neutral	0	1-Neutral	-24.99	Self-delta-pka	Nan	Nan
MEBVOH	1	1	noZ	noQ4	noWater	0	Neutral	0	1-Neutral	-24.99	Self-delta-pka	Nan	Nan
RENHEY	1	1	noZ	noQ4	noWater	0	Neutral	0	1-Neutral	-24.99	Self-delta-pka	Nan	Nan
YAFPOL	1	1	noZ	noQ4	noWater	0	Neutral	0	1-Neutral	-24.99	Self-delta-pka	Nan	Nan
XIMVIB	1	1	noZ	noQ4	noWater	0	Neutral	0	1-Neutral	-24.99	Self-delta-pka	Nan	Nan
YISKIX	1	1	noZ	noQ4	noWater	0	Neutral	0	1-Neutral	-24.98	Self-delta-pka	-27.95	Self-delta-pka
NASSAE	1	1	noZ	noQ4	noWater	0	Neutral	0	1-Neutral	-24.98	Self-delta-pka	Nan	Nan
MEBTOF	1	1	noZ	noQ4	noWater	0	Neutral	0	1-Neutral	-24.98	Self-delta-pka	-26.49	Self-delta-pka
IXILAE	1	1	noZ	noQ4	noWater	0	Neutral	0	1-Neutral	-24.98	Self-delta-pka	Nan	Nan
KELDUD	1	1	noZ	noQ4	noWater	0	Neutral	0	1-Neutral	-24.98	Self-delta-pka	Nan	Nan
LIZKEM	1	1	noZ	noQ4	noWater	0	Neutral	0	1-Neutral	-24.98	Self-delta-pka	Nan	Nan
SAHFIS	1	1	noZ	noQ4	noWater	0	Neutral	0	1-Neutral	-24.97	Self-delta-pka	Nan	Nan
HOXTEU	1	1	noZ	noQ4	noWater	0	Neutral	0	1-Neutral	-24.97	Self-delta-pka	Nan	Nan
JAZQEJ	1	1	noZ	noQ4	noWater	0	Neutral	0	1-Neutral	-24.97	Self-delta-pka	Nan	Nan
PUPZUX	1	1	noZ	noQ4	noWater	0	Neutral	0	1-Neutral	-24.97	Self-delta-pka	Nan	Nan
LIKKIC	1	1	noZ	noQ4	noWater	0	Neutral	0	1-Neutral	-24.96	Self-delta-pka	-26.39	Self-delta-pka
EBASIJ	1	1	noZ	noQ4	noWater	0	Neutral	0	1-Neutral	-24.96	Self-delta-pka	Nan	Nan
WOSXEH	1	1	noZ	noQ4	noWater	0	Neutral	0	1-Neutral	-24.96	Self-delta-pka	Nan	Nan
AHEZOD	1	1	noZ	noQ4	noWater	0	Neutral	0	1-Neutral	-24.95	Self-delta-pka	Nan	Nan
JASGEP	1	1	noZ	noQ4	noWater	0	Neutral	0	1-Neutral	-24.95	Self-delta-pka	Nan	Nan
YOPQUR	1	1	noZ	noQ4	noWater	0	Neutral	0	1-Neutral	-24.95	Self-delta-pka	Nan	Nan
HAFPAG	1	1	noZ	noQ4	noWater	0	Neutral	0	1-Neutral	-24.95	Self-delta-pka	Nan	Nan
IPUPUG	1	1	noZ	noQ4	noWater	0	Neutral	0	1-Neutral	-24.95	Self-delta-pka	Nan	Nan
ZISKOD	1	1	noZ	noQ4	noWater	0	Neutral	0	1-Neutral	-24.95	Self-delta-pka	Nan	Nan
PIPMAC	1	1	noZ	noQ4	noWater	0	Neutral	0	1-Neutral	-24.94	Self-delta-pka	-26.21	Self-delta-pka
WAKVAJ	1	1	noZ	noQ4	noWater	0	Neutral	0	1-Neutral	-24.94	Self-delta-pka	Nan	Nan
AJEDIF	1	1	noZ	noQ4	noWater	0	Neutral	0	1-Neutral	-24.94	Self-delta-pka	Nan	Nan
JADNIO	1	1	noZ	noQ4	noWater	0	Neutral	0	1-Neutral	-24.94	Self-delta-pka	Nan	Nan
LAVDIV	1	1	noZ	noQ4	noWater	0	Neutral	0	1-Neutral	-24.94	Self-delta-pka	Nan	Nan
SEFKUJ	1	1	noZ	noQ4	noWater	0	Neutral	0	1-Neutral	-24.94	Self-delta-pka	Nan	Nan
ALOPAU	1	1	noZ	noQ4	noWater	0	Neutral	0	1-Neutral	-24.94	Self-delta-pka	Nan	Nan
BIVNIG	1	1	noZ	noQ4	noWater	0	Neutral	0	1-Neutral	-24.94	Self-delta-pka	Nan	Nan
BAGXOY	1	1	noZ	noQ4	noWater	0	Neutral	0	1-Neutral	-24.93	Self-delta-pka	Nan	Nan
CILBUV	1	1	noZ	noQ4	noWater	0	Neutral	0	1-Neutral	-24.93	Self-delta-pka	Nan	Nan
NUWNID	1	1	noZ	noQ4	noWater	0	Neutral	0	1-Neutral	-24.93	Self-delta-pka	Nan	Nan
NUWNOJ	1	1	noZ	noQ4	noWater	0	Neutral	0	1-Neutral	-24.93	Self-delta-pka	Nan	Nan
PACVOH	1	1	noZ	noQ4	noWater	0	Neutral	0	1-Neutral	-24.93	Self-delta-pka	Nan	Nan
SACKEN	1	1	noZ	noQ4	noWater	0	Neutral	0	1-Neutral	-24.93	Self-delta-pka	Nan	Nan
SACKIR	1	1	noZ	noQ4	noWater	0	Neutral	0	1-Neutral	-24.93	Self-delta-pka	Nan	Nan
ZALKUV	1	1	noZ	noQ4	noWater	0	Neutral	0	1-Neutral	-24.93	Self-delta-pka	Nan	Nan
UVEBOO	1	1	noZ	noQ4	noWater	0	Neutral	0	1-Neutral	-24.92	Self-delta-pka	-26.19	Self-delta-pka
IXILIM	1	1	noZ	noQ4	noWater	0	Neutral	0	1-Neutral	-24.92	Self-delta-pka	Nan	Nan
LIVXEU	1	1	noZ	noQ4	noWater	0	Neutral	0	1-Neutral	-24.92	Self-delta-pka	Nan	Nan
NEYKUX	1	1	noZ	noQ4	noWater	0	Neutral	0	1-Neutral	-24.92	Self-delta-pka	Nan	Nan
OXAVEP	1	1	noZ	noQ4	noWater	0	Neutral	0	1-Neutral	-24.92	Self-delta-pka	Nan	Nan
UKEQAD	1	1	noZ	noQ4	noWater	0	Neutral	0	1-Neutral	-24.92	Self-delta-pka	Nan	Nan
XURYIS	1	1	noZ	noQ4	noWater	0	Neutral	0	1-Neutral	-24.92	Self-delta-pka	Nan	Nan
WIRMUI	1	1	noZ	noQ4	noWater	0	Neutral	0	1-Neutral	-24.92	Self-delta-pka	Nan	Nan
YAVJAG	1	1	noZ	noQ4	noWater	0	Neutral	0	1-Neutral	-24.92	Self-delta-pka	Nan	Nan
ETACAE	1	1	noZ	noQ4	noWater	0	Neutral	0	1-Neutral	-24.92	Self-delta-pka	Nan	Nan
ACUZEF	1	1	noZ	noQ4	noWater	0	Neutral	0	1-Neutral	-24.91	Self-delta-pka	Nan	Nan
EPOXUE	1	1	noZ	noQ4	noWater	0	Neutral	0	1-Neutral	-24.91	Self-delta-pka	Nan	Nan
GUTGAD	1	1	noZ	noQ4	noWater	0	Neutral	0	1-Neutral	-24.91	Self-delta-pka	Nan	Nan
KEQPAA	1	1	noZ	noQ4	noWater	0	Neutral	0	1-Neutral	-24.91	Self-delta-pka	Nan	Nan
LUBZIR	1	1	noZ	noQ4	noWater	0	Neutral	0	1-Neutral	-24.91	Self-delta-pka	Nan	Nan
ZEDDAQ	1	1	noZ	noQ4	noWater	0	Neutral	0	1-Neutral	-24.91	Self-delta-pka	Nan	Nan
BETNEU	1	1	noZ	noQ4	noWater	0	Neutral	0	1-Neutral	-24.9	Self-delta-pka	Nan	Nan
GUZYEG	1	1	noZ	noQ4	noWater	0	Neutral	0	1-Neutral	-24.9	Self-delta-pka	Nan	Nan
KIXPEN	1	1	noZ	noQ4	noWater	0	Neutral	0	1-Neutral	-24.9	Self-delta-pka	Nan	Nan
RANKEW	1	1	noZ	noQ4	noWater	0	Neutral	0	1-Neutral	-24.9	Self-delta-pka	Nan	Nan
VIZWIL	1	1	noZ	noQ4	noWater	0	Neutral	0	1-Neutral	-24.9	Self-delta-pka	Nan	Nan
QATDIY	3	3	noZ	noQ4	noWater	0	Neutral	0	3-N_	-24.9	Multi-delta-pka	-25.34	Multi-delta-pka
MIWFED	1	1	noZ	noQ4	noWater	0	Neutral	0	1-Neutral	-24.89	Self-delta-pka	-26.47	Self-delta-pka
EPOXIS	1	1	noZ	noQ4	noWater	0	Neutral	0	1-Neutral	-24.89	Self-delta-pka	Nan	Nan
IPAHUD	1	1	noZ	noQ4	noWater	0	Neutral	0	1-Neutral	-24.89	Self-delta-pka	Nan	Nan
IWANAX	1	1	noZ	noQ4	noWater	0	Neutral	0	1-Neutral	-24.89	Self-delta-pka	Nan	Nan
KUKVAO	1	1	noZ	noQ4	noWater	0	Neutral	0	1-Neutral	-24.89	Self-delta-pka	Nan	Nan
MOVFOS	1	1	noZ	noQ4	noWater	0	Neutral	0	1-Neutral	-24.89	Self-delta-pka	Nan	Nan
VOFDAY	1	1	noZ	noQ4	noWater	0	Neutral	0	1-Neutral	-24.89	Self-delta-pka	Nan	Nan
XUBDIH	1	1	noZ	noQ4	noWater	0	Neutral	0	1-Neutral	-24.89	Self-delta-pka	Nan	Nan
ZIVKEX	1	1	noZ	noQ4	noWater	0	Neutral	0	1-Neutral	-24.89	Self-delta-pka	Nan	Nan
MOHGUM	1	1	noZ	noQ4	noWater	0	Neutral	0	1-Neutral	-24.88	Self-delta-pka	Nan	Nan
MIHCUE	1	1	noZ	noQ4	noWater	0	Neutral	0	1-Neutral	-24.88	Self-delta-pka	Nan	Nan
MIZJEM	1	1	noZ	noQ4	noWater	0	Neutral	0	1-Neutral	-24.88	Self-delta-pka	Nan	Nan
PEQHEY	1	1	noZ	noQ4	noWater	0	Neutral	0	1-Neutral	-24.88	Self-delta-pka	Nan	Nan
VODGEA	1	1	noZ	noQ4	noWater	0	Neutral	0	1-Neutral	-24.88	Self-delta-pka	Nan	Nan
YIXRAA	1	1	noZ	noQ4	noWater	0	Neutral	0	1-Neutral	-24.88	Self-delta-pka	Nan	Nan
CIDGII	1	1	noZ	noQ4	noWater	0	Neutral	0	1-Neutral	-24.87	Self-delta-pka	Nan	Nan
DOJXAC	1	1	noZ	noQ4	noWater	0	Neutral	0	1-Neutral	-24.87	Self-delta-pka	Nan	Nan
TCCHXO	1	1	noZ	noQ4	noWater	0	Neutral	0	1-Neutral	-24.87	Self-delta-pka	Nan	Nan
WIBLAV	1	1	noZ	noQ4	noWater	0	Neutral	0	1-Neutral	-24.87	Self-delta-pka	Nan	Nan
OJOYUK	1	1	noZ	noQ4	noWater	0	Neutral	0	1-Neutral	-24.87	Self-delta-pka	Nan	Nan
EFEHEE	1	1	noZ	noQ4	noWater	0	Neutral	0	1-Neutral	-24.87	Self-delta-pka	Nan	Nan
TEVLIQ	2	1	noZ	noQ4	noWater	1	Neutral	0	1-N_1-Solvate_	-24.87	Self-delta-pka	Nan	Nan
AFONEO	1	1	noZ	noQ4	noWater	0	Neutral	0	1-Neutral	-24.86	Self-delta-pka	Nan	Nan
AYAYUV	1	1	noZ	noQ4	noWater	0	Neutral	0	1-Neutral	-24.86	Self-delta-pka	Nan	Nan
AYIKUP	1	1	noZ	noQ4	noWater	0	Neutral	0	1-Neutral	-24.86	Self-delta-pka	Nan	Nan
COJWEF	1	1	noZ	noQ4	noWater	0	Neutral	0	1-Neutral	-24.86	Self-delta-pka	Nan	Nan
DEFKEE	1	1	noZ	noQ4	noWater	0	Neutral	0	1-Neutral	-24.86	Self-delta-pka	Nan	Nan
JOGVIL	1	1	noZ	noQ4	noWater	0	Neutral	0	1-Neutral	-24.86	Self-delta-pka	Nan	Nan
LEHXIG	1	1	noZ	noQ4	noWater	0	Neutral	0	1-Neutral	-24.86	Self-delta-pka	Nan	Nan
QUXPAC	1	1	noZ	noQ4	noWater	0	Neutral	0	1-Neutral	-24.86	Self-delta-pka	Nan	Nan
QUZTIP	1	1	noZ	noQ4	noWater	0	Neutral	0	1-Neutral	-24.86	Self-delta-pka	Nan	Nan
SEFLIY	1	1	noZ	noQ4	noWater	0	Neutral	0	1-Neutral	-24.86	Self-delta-pka	Nan	Nan
VINZIC	1	1	noZ	noQ4	noWater	0	Neutral	0	1-Neutral	-24.86	Self-delta-pka	Nan	Nan
COJWAB	1	1	noZ	noQ4	noWater	0	Neutral	0	1-Neutral	-24.85	Self-delta-pka	Nan	Nan
LESXEN	1	1	noZ	noQ4	noWater	0	Neutral	0	1-Neutral	-24.85	Self-delta-pka	Nan	Nan
QIRDIG	1	1	noZ	noQ4	noWater	0	Neutral	0	1-Neutral	-24.85	Self-delta-pka	Nan	Nan
RUNFOW	1	1	noZ	noQ4	noWater	0	Neutral	0	1-Neutral	-24.85	Self-delta-pka	Nan	Nan
ZAHREF	1	1	noZ	noQ4	noWater	0	Neutral	0	1-Neutral	-24.85	Self-delta-pka	Nan	Nan
SEFLEU	1	1	noZ	noQ4	noWater	0	Neutral	0	1-Neutral	-24.85	Self-delta-pka	Nan	Nan
ENACEC	1	1	noZ	noQ4	noWater	0	Neutral	0	1-Neutral	-24.84	Self-delta-pka	Nan	Nan
KAKXON	1	1	noZ	noQ4	noWater	0	Neutral	0	1-Neutral	-24.84	Self-delta-pka	Nan	Nan
ETIGOD	1	1	noZ	noQ4	noWater	0	Neutral	0	1-Neutral	-24.84	Self-delta-pka	Nan	Nan
GUHCUI	1	1	noZ	noQ4	noWater	0	Neutral	0	1-Neutral	-24.84	Self-delta-pka	Nan	Nan
KIKPIE	1	1	noZ	noQ4	noWater	0	Neutral	0	1-Neutral	-24.84	Self-delta-pka	Nan	Nan
RIMCAR	2	1	noZ	noQ4	noWater	1	Neutral	0	1-N_1-Solvate_	-24.84	Self-delta-pka	Nan	Nan
GADJIG	1	1	noZ	noQ4	noWater	0	Neutral	0	1-Neutral	-24.83	Self-delta-pka	Nan	Nan
GEHPOB	1	1	noZ	noQ4	noWater	0	Neutral	0	1-Neutral	-24.83	Self-delta-pka	Nan	Nan
WAFHIX	1	1	noZ	noQ4	noWater	0	Neutral	0	1-Neutral	-24.83	Self-delta-pka	Nan	Nan
GITNEE	1	1	noZ	noQ4	noWater	0	Neutral	0	1-Neutral	-24.83	Self-delta-pka	Nan	Nan
TEFGET	1	1	noZ	noQ4	noWater	0	Neutral	0	1-Neutral	-24.83	Self-delta-pka	Nan	Nan
SADNIY	1	1	noZ	noQ4	noWater	0	Neutral	0	1-Neutral	-24.82	Self-delta-pka	-26.52	Self-delta-pka
ADAQAZ	1	1	noZ	noQ4	noWater	0	Neutral	0	1-Neutral	-24.82	Self-delta-pka	Nan	Nan
AHUDUC	1	1	noZ	noQ4	noWater	0	Neutral	0	1-Neutral	-24.82	Self-delta-pka	Nan	Nan
GEHPUH	1	1	noZ	noQ4	noWater	0	Neutral	0	1-Neutral	-24.82	Self-delta-pka	Nan	Nan
NEXXUJ	1	1	noZ	noQ4	noWater	0	Neutral	0	1-Neutral	-24.82	Self-delta-pka	Nan	Nan
WAFGAO	1	1	noZ	noQ4	noWater	0	Neutral	0	1-Neutral	-24.82	Self-delta-pka	Nan	Nan
IDEKIL	1	1	noZ	noQ4	noWater	0	Neutral	0	1-Neutral	-24.81	Self-delta-pka	Nan	Nan
MUVZUZ	1	1	noZ	noQ4	noWater	0	Neutral	0	1-Neutral	-24.81	Self-delta-pka	Nan	Nan
UCOTOW	1	1	noZ	noQ4	noWater	0	Neutral	0	1-Neutral	-24.81	Self-delta-pka	Nan	Nan
QEXYUO	1	1	noZ	noQ4	noWater	0	Neutral	0	1-Neutral	-24.81	Self-delta-pka	-26.52	Self-delta-pka
EFEKAC	1	1	noZ	noQ4	noWater	0	Neutral	0	1-Neutral	-24.81	Self-delta-pka	Nan	Nan
KACLOP	1	1	noZ	noQ4	noWater	0	Neutral	0	1-Neutral	-24.81	Self-delta-pka	Nan	Nan
QEKWAE	1	1	noZ	noQ4	noWater	0	Neutral	0	1-Neutral	-24.81	Self-delta-pka	Nan	Nan
QEKWOS	1	1	noZ	noQ4	noWater	0	Neutral	0	1-Neutral	-24.81	Self-delta-pka	Nan	Nan
SEDJES	1	1	noZ	noQ4	noWater	0	Neutral	0	1-Neutral	-24.81	Self-delta-pka	Nan	Nan
YIVSOL02	1	1	noZ	noQ4	noWater	0	Neutral	0	1-Neutral	-24.81	Self-delta-pka	Nan	Nan
LEHXOM	1	1	noZ	noQ4	noWater	0	Neutral	0	1-Neutral	-24.8	Self-delta-pka	Nan	Nan
TCMCHO	1	1	noZ	noQ4	noWater	0	Neutral	0	1-Neutral	-24.8	Self-delta-pka	Nan	Nan
ZEDCEQ	1	1	noZ	noQ4	noWater	0	Neutral	0	1-Neutral	-24.8	Self-delta-pka	Nan	Nan
EZUNIY	1	1	Zwit	Q4	noWater	0	Neutral	0	1-NeutralZQ4	-24.8	Self-delta-pka	Nan	Nan
EZUNEU	1	1	Zwit	Q4	noWater	0	Neutral	0	1-NeutralZQ4	-24.8	Self-delta-pka	Nan	Nan
HOYPAN	2	1	noZ	noQ4	noWater	1	Neutral	0	1-N_1-Solvate_	-24.8	Self-delta-pka	Nan	Nan
TCYHXO	1	1	noZ	noQ4	noWater	0	Neutral	0	1-Neutral	-24.8	Self-delta-pka	Nan	Nan
EBILUZ	1	1	noZ	noQ4	noWater	0	Neutral	0	1-Neutral	-24.79	Self-delta-pka	-26.05	Self-delta-pka
BETNIY	1	1	noZ	noQ4	noWater	0	Neutral	0	1-Neutral	-24.79	Self-delta-pka	Nan	Nan
HIVSAH	1	1	noZ	noQ4	noWater	0	Neutral	0	1-Neutral	-24.79	Self-delta-pka	Nan	Nan
XERGIN	1	1	noZ	noQ4	noWater	0	Neutral	0	1-Neutral	-24.79	Self-delta-pka	Nan	Nan
NACJIK	1	1	noZ	noQ4	noWater	0	Neutral	0	1-Neutral	-24.78	Self-delta-pka	-26.9	Self-delta-pka
FORHOJ	1	1	noZ	noQ4	noWater	0	Neutral	0	1-Neutral	-24.78	Self-delta-pka	-25.89	Self-delta-pka
WOXSIL	1	1	noZ	noQ4	noWater	0	Neutral	0	1-Neutral	-24.78	Self-delta-pka	-25.89	Self-delta-pka
NURZUV	1	1	noZ	noQ4	noWater	0	Neutral	0	1-Neutral	-24.78	Self-delta-pka	Nan	Nan
RAVBIA	1	1	noZ	noQ4	noWater	0	Neutral	0	1-Neutral	-24.78	Self-delta-pka	Nan	Nan
UVEYIE	1	1	noZ	noQ4	noWater	0	Neutral	0	1-Neutral	-24.78	Self-delta-pka	Nan	Nan
YEPSAO	2	1	noZ	noQ4	noWater	1	Neutral	0	1-N_1-Solvate_	-24.78	Self-delta-pka	Nan	Nan
VAMPAD	1	1	noZ	noQ4	noWater	0	Neutral	0	1-Neutral	-24.78	Self-delta-pka	Nan	Nan
XOZFAU	1	1	noZ	noQ4	noWater	0	Neutral	0	1-Neutral	-24.78	Self-delta-pka	Nan	Nan
WIRKUD	1	1	noZ	noQ4	noWater	0	Neutral	0	1-Neutral	-24.77	Self-delta-pka	-27.1	Self-delta-pka
QIJJAX	1	1	noZ	noQ4	noWater	0	Neutral	0	1-Neutral	-24.77	Self-delta-pka	-25.76	Self-delta-pka
AHECOG	1	1	noZ	noQ4	noWater	0	Neutral	0	1-Neutral	-24.77	Self-delta-pka	Nan	Nan
FOKPON	1	1	noZ	noQ4	noWater	0	Neutral	0	1-Neutral	-24.77	Self-delta-pka	Nan	Nan
GEKDAC	1	1	noZ	noQ4	noWater	0	Neutral	0	1-Neutral	-24.77	Self-delta-pka	Nan	Nan
IXILEI	1	1	noZ	noQ4	noWater	0	Neutral	0	1-Neutral	-24.77	Self-delta-pka	Nan	Nan
NERTIQ	1	1	noZ	noQ4	noWater	0	Neutral	0	1-Neutral	-24.77	Self-delta-pka	Nan	Nan
PATYOA	1	1	noZ	noQ4	noWater	0	Neutral	0	1-Neutral	-24.77	Self-delta-pka	Nan	Nan
PAVLUV	1	1	noZ	noQ4	noWater	0	Neutral	0	1-Neutral	-24.77	Self-delta-pka	Nan	Nan
TITRUL	1	1	noZ	noQ4	noWater	0	Neutral	0	1-Neutral	-24.77	Self-delta-pka	Nan	Nan
XURYAK	1	1	noZ	noQ4	noWater	0	Neutral	0	1-Neutral	-24.77	Self-delta-pka	Nan	Nan
XUWWES	1	1	noZ	noQ4	noWater	0	Neutral	0	1-Neutral	-24.76	Self-delta-pka	-25.99	Self-delta-pka
NERGEZ	1	1	noZ	noQ4	noWater	0	Neutral	0	1-Neutral	-24.76	Self-delta-pka	Nan	Nan
RUCLIM	1	1	noZ	noQ4	noWater	0	Neutral	0	1-Neutral	-24.76	Self-delta-pka	Nan	Nan
TIGYOY	1	1	noZ	noQ4	noWater	0	Neutral	0	1-Neutral	-24.76	Self-delta-pka	Nan	Nan
URUSAC	1	1	noZ	noQ4	noWater	0	Neutral	0	1-Neutral	-24.76	Self-delta-pka	Nan	Nan
URUSEG	1	1	noZ	noQ4	noWater	0	Neutral	0	1-Neutral	-24.76	Self-delta-pka	Nan	Nan
WIHFEZ	1	1	noZ	noQ4	noWater	0	Neutral	0	1-Neutral	-24.76	Self-delta-pka	Nan	Nan
IJEQUM	1	1	noZ	noQ4	noWater	0	Neutral	0	1-Neutral	-24.76	Self-delta-pka	Nan	Nan
CEKMOX	1	1	noZ	noQ4	noWater	0	Neutral	0	1-Neutral	-24.76	Self-delta-pka	Nan	Nan
HOVGUU	1	1	noZ	noQ4	noWater	0	Neutral	0	1-Neutral	-24.76	Self-delta-pka	Nan	Nan
IZOQOD	1	1	noZ	noQ4	noWater	0	Neutral	0	1-Neutral	-24.76	Self-delta-pka	Nan	Nan
KOVFEG	1	1	noZ	noQ4	noWater	0	Neutral	0	1-Neutral	-24.76	Self-delta-pka	Nan	Nan
LESJAU01	1	1	noZ	noQ4	noWater	0	Neutral	0	1-Neutral	-24.76	Self-delta-pka	Nan	Nan
YOMXIH	1	1	noZ	noQ4	noWater	0	Neutral	0	1-Neutral	-24.76	Self-delta-pka	Nan	Nan
ZUFGOY	1	1	noZ	noQ4	noWater	0	Neutral	0	1-Neutral	-24.76	Self-delta-pka	Nan	Nan
CASSOE	1	1	noZ	noQ4	noWater	0	Neutral	0	1-Neutral	-24.75	Self-delta-pka	Nan	Nan
FABSAC10	1	1	noZ	noQ4	noWater	0	Neutral	0	1-Neutral	-24.75	Self-delta-pka	Nan	Nan
FOKZIP	1	1	noZ	noQ4	noWater	0	Neutral	0	1-Neutral	-24.75	Self-delta-pka	Nan	Nan
FUFFOD	1	1	noZ	noQ4	noWater	0	Neutral	0	1-Neutral	-24.75	Self-delta-pka	Nan	Nan
FUMSUB	1	1	noZ	noQ4	noWater	0	Neutral	0	1-Neutral	-24.75	Self-delta-pka	Nan	Nan
HAMMEP	1	1	noZ	noQ4	noWater	0	Neutral	0	1-Neutral	-24.75	Self-delta-pka	Nan	Nan
HISCOC	1	1	noZ	noQ4	noWater	0	Neutral	0	1-Neutral	-24.75	Self-delta-pka	Nan	Nan
NODXAH	1	1	noZ	noQ4	noWater	0	Neutral	0	1-Neutral	-24.75	Self-delta-pka	Nan	Nan
RIFROQ	1	1	noZ	noQ4	noWater	0	Neutral	0	1-Neutral	-24.75	Self-delta-pka	Nan	Nan
VEJXUD	1	1	noZ	noQ4	noWater	0	Neutral	0	1-Neutral	-24.75	Self-delta-pka	Nan	Nan
YAYLUI	1	1	noZ	noQ4	noWater	0	Neutral	0	1-Neutral	-24.75	Self-delta-pka	Nan	Nan
YAYMAP	1	1	noZ	noQ4	noWater	0	Neutral	0	1-Neutral	-24.75	Self-delta-pka	Nan	Nan
BIKGUX10	1	1	noZ	noQ4	noWater	0	Neutral	0	1-Neutral	-24.74	Self-delta-pka	-25.92	Self-delta-pka
BUXWEY	1	1	noZ	noQ4	noWater	0	Neutral	0	1-Neutral	-24.74	Self-delta-pka	Nan	Nan
NEFLUG	1	1	noZ	noQ4	noWater	0	Neutral	0	1-Neutral	-24.74	Self-delta-pka	Nan	Nan
NERTAI	1	1	noZ	noQ4	noWater	0	Neutral	0	1-Neutral	-24.74	Self-delta-pka	Nan	Nan
HAMMAL	1	1	noZ	noQ4	noWater	0	Neutral	0	1-Neutral	-24.74	Self-delta-pka	Nan	Nan
NILWOU	1	1	noZ	noQ4	noWater	0	Neutral	0	1-Neutral	-24.74	Self-delta-pka	Nan	Nan
RUGTUK	1	1	noZ	noQ4	noWater	0	Neutral	0	1-Neutral	-24.74	Self-delta-pka	Nan	Nan
BIKGEH10	1	1	noZ	noQ4	noWater	0	Neutral	0	1-Neutral	-24.73	Self-delta-pka	-25.91	Self-delta-pka
BIKGOR10	1	1	noZ	noQ4	noWater	0	Neutral	0	1-Neutral	-24.73	Self-delta-pka	-25.91	Self-delta-pka
GOFQEZ	1	1	noZ	noQ4	noWater	0	Neutral	0	1-Neutral	-24.73	Self-delta-pka	Nan	Nan
PALMAT	1	1	noZ	noQ4	noWater	0	Neutral	0	1-Neutral	-24.73	Self-delta-pka	Nan	Nan
PESFUR	1	1	noZ	noQ4	noWater	0	Neutral	0	1-Neutral	-24.73	Self-delta-pka	Nan	Nan
UCUZAW	1	1	noZ	noQ4	noWater	0	Neutral	0	1-Neutral	-24.73	Self-delta-pka	Nan	Nan
OBUMAC	1	1	noZ	noQ4	noWater	0	Neutral	0	1-Neutral	-24.73	Self-delta-pka	-26.55	Self-delta-pka
BUKPAY	1	1	noZ	noQ4	noWater	0	Neutral	0	1-Neutral	-24.73	Self-delta-pka	Nan	Nan
GOXSAP	1	1	noZ	noQ4	noWater	0	Neutral	0	1-Neutral	-24.73	Self-delta-pka	Nan	Nan
PIZROI	1	1	noZ	noQ4	noWater	0	Neutral	0	1-Neutral	-24.73	Self-delta-pka	Nan	Nan
SECJEP	1	1	noZ	noQ4	noWater	0	Neutral	0	1-Neutral	-24.73	Self-delta-pka	Nan	Nan
OTIKAF	2	1	noZ	noQ4	noWater	1	Neutral	0	1-N_1-Solvate_	-24.73	Self-delta-pka	Nan	Nan
TABYAW	2	2	noZ	noQ4	noWater	0	Neutral	0	2-N_	-24.73	Self-delta-pka	Nan	Nan
NAGWAW	1	1	noZ	noQ4	noWater	0	Neutral	0	1-Neutral	-24.72	Self-delta-pka	Nan	Nan
SUYBIX	1	1	noZ	noQ4	noWater	0	Neutral	0	1-Neutral	-24.72	Self-delta-pka	Nan	Nan
ASEXEB	1	1	noZ	noQ4	noWater	0	Neutral	0	1-Neutral	-24.72	Self-delta-pka	Nan	Nan
BABHER	1	1	noZ	noQ4	noWater	0	Neutral	0	1-Neutral	-24.72	Self-delta-pka	Nan	Nan
BABKIB	1	1	noZ	noQ4	noWater	0	Neutral	0	1-Neutral	-24.72	Self-delta-pka	Nan	Nan
DOFZUU	1	1	noZ	noQ4	noWater	0	Neutral	0	1-Neutral	-24.72	Self-delta-pka	Nan	Nan
HUYDOW	1	1	noZ	noQ4	noWater	0	Neutral	0	1-Neutral	-24.72	Self-delta-pka	Nan	Nan
MAXQAG	1	1	noZ	noQ4	noWater	0	Neutral	0	1-Neutral	-24.72	Self-delta-pka	Nan	Nan
NERGAV	1	1	noZ	noQ4	noWater	0	Neutral	0	1-Neutral	-24.72	Self-delta-pka	Nan	Nan
PEZDIH	1	1	noZ	noQ4	noWater	0	Neutral	0	1-Neutral	-24.72	Self-delta-pka	Nan	Nan
TEZVOK	1	1	noZ	noQ4	noWater	0	Neutral	0	1-Neutral	-24.72	Self-delta-pka	Nan	Nan
VANFEV	1	1	noZ	noQ4	noWater	0	Neutral	0	1-Neutral	-24.72	Self-delta-pka	Nan	Nan
KUYBEM	1	1	noZ	noQ4	noWater	0	Neutral	0	1-Neutral	-24.71	Self-delta-pka	-26.51	Self-delta-pka
ZOCYIB	1	1	noZ	noQ4	noWater	0	Neutral	0	1-Neutral	-24.71	Self-delta-pka	-25.92	Self-delta-pka
DAXMHO	1	1	noZ	noQ4	noWater	0	Neutral	0	1-Neutral	-24.71	Self-delta-pka	Nan	Nan
EGURON	1	1	noZ	noQ4	noWater	0	Neutral	0	1-Neutral	-24.71	Self-delta-pka	Nan	Nan
FITJID	1	1	noZ	noQ4	noWater	0	Neutral	0	1-Neutral	-24.71	Self-delta-pka	Nan	Nan
GEHQES	1	1	noZ	noQ4	noWater	0	Neutral	0	1-Neutral	-24.71	Self-delta-pka	Nan	Nan
MEJLOF	1	1	noZ	noQ4	noWater	0	Neutral	0	1-Neutral	-24.71	Self-delta-pka	Nan	Nan
MEJLUL	1	1	noZ	noQ4	noWater	0	Neutral	0	1-Neutral	-24.71	Self-delta-pka	Nan	Nan
NEJXUY	1	1	noZ	noQ4	noWater	0	Neutral	0	1-Neutral	-24.71	Self-delta-pka	Nan	Nan
NEJYAF	1	1	noZ	noQ4	noWater	0	Neutral	0	1-Neutral	-24.71	Self-delta-pka	Nan	Nan
PABDON	1	1	noZ	noQ4	noWater	0	Neutral	0	1-Neutral	-24.71	Self-delta-pka	Nan	Nan
QOKYUL	1	1	noZ	noQ4	noWater	0	Neutral	0	1-Neutral	-24.71	Self-delta-pka	Nan	Nan
TANGAQ	1	1	noZ	noQ4	noWater	0	Neutral	0	1-Neutral	-24.71	Self-delta-pka	Nan	Nan
XAZHAI	1	1	noZ	noQ4	noWater	0	Neutral	0	1-Neutral	-24.71	Self-delta-pka	Nan	Nan
DIPGEQ	1	1	noZ	noQ4	noWater	0	Neutral	0	1-Neutral	-24.7	Self-delta-pka	Nan	Nan
FAZLUN	1	1	noZ	noQ4	noWater	0	Neutral	0	1-Neutral	-24.7	Self-delta-pka	Nan	Nan
POKFON	1	1	noZ	noQ4	noWater	0	Neutral	0	1-Neutral	-24.7	Self-delta-pka	Nan	Nan
BOMKAR	1	1	noZ	noQ4	noWater	0	Neutral	0	1-Neutral	-24.7	Self-delta-pka	Nan	Nan
CAHDAS	1	1	noZ	noQ4	noWater	0	Neutral	0	1-Neutral	-24.7	Self-delta-pka	Nan	Nan
COVNOS	1	1	noZ	noQ4	noWater	0	Neutral	0	1-Neutral	-24.7	Self-delta-pka	Nan	Nan
EVOQAI	1	1	noZ	noQ4	noWater	0	Neutral	0	1-Neutral	-24.7	Self-delta-pka	Nan	Nan
FABRAB10	1	1	noZ	noQ4	noWater	0	Neutral	0	1-Neutral	-24.7	Self-delta-pka	Nan	Nan
FABRAB11	1	1	noZ	noQ4	noWater	0	Neutral	0	1-Neutral	-24.7	Self-delta-pka	Nan	Nan
FUXCUW	1	1	noZ	noQ4	noWater	0	Neutral	0	1-Neutral	-24.7	Self-delta-pka	Nan	Nan
HIJVOL	1	1	noZ	noQ4	noWater	0	Neutral	0	1-Neutral	-24.7	Self-delta-pka	Nan	Nan
HIJWIG	1	1	noZ	noQ4	noWater	0	Neutral	0	1-Neutral	-24.7	Self-delta-pka	Nan	Nan
LEWBEU	1	1	noZ	noQ4	noWater	0	Neutral	0	1-Neutral	-24.7	Self-delta-pka	Nan	Nan
LEWBIY	1	1	noZ	noQ4	noWater	0	Neutral	0	1-Neutral	-24.7	Self-delta-pka	Nan	Nan
NEDPER	1	1	noZ	noQ4	noWater	0	Neutral	0	1-Neutral	-24.7	Self-delta-pka	Nan	Nan
OKOFAW	1	1	noZ	noQ4	noWater	0	Neutral	0	1-Neutral	-24.7	Self-delta-pka	Nan	Nan
QISJOU	1	1	noZ	noQ4	noWater	0	Neutral	0	1-Neutral	-24.7	Self-delta-pka	Nan	Nan
RAHFEL	1	1	noZ	noQ4	noWater	0	Neutral	0	1-Neutral	-24.7	Self-delta-pka	Nan	Nan
SIQLEL	1	1	noZ	noQ4	noWater	0	Neutral	0	1-Neutral	-24.7	Self-delta-pka	Nan	Nan
SIRZOI01	1	1	noZ	noQ4	noWater	0	Neutral	0	1-Neutral	-24.7	Self-delta-pka	Nan	Nan
SODMON	1	1	noZ	noQ4	noWater	0	Neutral	0	1-Neutral	-24.7	Self-delta-pka	Nan	Nan
VOGTEQ	1	1	noZ	noQ4	noWater	0	Neutral	0	1-Neutral	-24.7	Self-delta-pka	Nan	Nan
YUWSUF	1	1	noZ	noQ4	noWater	0	Neutral	0	1-Neutral	-24.7	Self-delta-pka	Nan	Nan
BEVERC	2	1	noZ	noQ4	Water	0	Neutral	0	1-N__Hydrate	-24.7	Self-delta-pka	Nan	Nan
CUFWAB	1	1	noZ	noQ4	noWater	0	Neutral	0	1-Neutral	-24.69	Self-delta-pka	Nan	Nan
DUKKEA	1	1	noZ	noQ4	noWater	0	Neutral	0	1-Neutral	-24.69	Self-delta-pka	Nan	Nan
GEXXOW	1	1	noZ	noQ4	noWater	0	Neutral	0	1-Neutral	-24.69	Self-delta-pka	Nan	Nan
UDOGAX	1	1	noZ	noQ4	noWater	0	Neutral	0	1-Neutral	-24.69	Self-delta-pka	Nan	Nan
VIRXEC	1	1	noZ	noQ4	noWater	0	Neutral	0	1-Neutral	-24.69	Self-delta-pka	Nan	Nan
WIDWUD	1	1	noZ	noQ4	noWater	0	Neutral	0	1-Neutral	-24.69	Self-delta-pka	Nan	Nan
CIYFEW	1	1	noZ	noQ4	noWater	0	Neutral	0	1-Neutral	-24.69	Self-delta-pka	Nan	Nan
PACTIY	1	1	noZ	noQ4	noWater	0	Neutral	0	1-Neutral	-24.68	Self-delta-pka	-27.21	Self-delta-pka
AHEPOS	1	1	noZ	noQ4	noWater	0	Neutral	0	1-Neutral	-24.68	Self-delta-pka	Nan	Nan
CEHFUS	1	1	noZ	noQ4	noWater	0	Neutral	0	1-Neutral	-24.68	Self-delta-pka	Nan	Nan
CIJHUZ	1	1	noZ	noQ4	noWater	0	Neutral	0	1-Neutral	-24.68	Self-delta-pka	Nan	Nan
DUVFOP20	1	1	noZ	noQ4	noWater	0	Neutral	0	1-Neutral	-24.68	Self-delta-pka	Nan	Nan
HADFEY	1	1	noZ	noQ4	noWater	0	Neutral	0	1-Neutral	-24.68	Self-delta-pka	Nan	Nan
IHUNAC	1	1	noZ	noQ4	noWater	0	Neutral	0	1-Neutral	-24.68	Self-delta-pka	Nan	Nan
KICLOA	1	1	noZ	noQ4	noWater	0	Neutral	0	1-Neutral	-24.68	Self-delta-pka	Nan	Nan
TAMROR	1	1	noZ	noQ4	noWater	0	Neutral	0	1-Neutral	-24.68	Self-delta-pka	Nan	Nan
TAMRUX	1	1	noZ	noQ4	noWater	0	Neutral	0	1-Neutral	-24.68	Self-delta-pka	Nan	Nan
TAQPUY	1	1	noZ	noQ4	noWater	0	Neutral	0	1-Neutral	-24.68	Self-delta-pka	Nan	Nan
ZABTUU	1	1	noZ	noQ4	noWater	0	Neutral	0	1-Neutral	-24.68	Self-delta-pka	Nan	Nan
HARCEL	1	1	noZ	noQ4	noWater	0	Neutral	0	1-Neutral	-24.67	Self-delta-pka	Nan	Nan
LONZAS	1	1	noZ	noQ4	noWater	0	Neutral	0	1-Neutral	-24.67	Self-delta-pka	Nan	Nan
PDTHON	1	1	noZ	noQ4	noWater	0	Neutral	0	1-Neutral	-24.67	Self-delta-pka	Nan	Nan
QEDTAX	1	1	noZ	noQ4	noWater	0	Neutral	0	1-Neutral	-24.67	Self-delta-pka	Nan	Nan
QIWPAP	1	1	noZ	noQ4	noWater	0	Neutral	0	1-Neutral	-24.67	Self-delta-pka	Nan	Nan
SUKLIT	1	1	noZ	noQ4	noWater	0	Neutral	0	1-Neutral	-24.67	Self-delta-pka	Nan	Nan
TAWPIR	1	1	noZ	noQ4	noWater	0	Neutral	0	1-Neutral	-24.67	Self-delta-pka	Nan	Nan
AGAKIE	1	1	noZ	noQ4	noWater	0	Neutral	0	1-Neutral	-24.67	Self-delta-pka	Nan	Nan
YOKXAZ	1	1	noZ	noQ4	noWater	0	Neutral	0	1-Neutral	-24.67	Self-delta-pka	Nan	Nan
QIXQEV	1	1	noZ	noQ4	noWater	0	Neutral	0	1-Neutral	-24.66	Self-delta-pka	Nan	Nan
MEDRIY01	1	1	noZ	noQ4	noWater	0	Neutral	0	1-Neutral	-24.66	Self-delta-pka	-27.31	Self-delta-pka
CANAPQ01	1	1	noZ	noQ4	noWater	0	Neutral	0	1-Neutral	-24.66	Self-delta-pka	Nan	Nan
ECEREL	1	1	noZ	noQ4	noWater	0	Neutral	0	1-Neutral	-24.66	Self-delta-pka	Nan	Nan
EGACEV	1	1	noZ	noQ4	noWater	0	Neutral	0	1-Neutral	-24.66	Self-delta-pka	Nan	Nan
SATMIK	1	1	noZ	noQ4	noWater	0	Neutral	0	1-Neutral	-24.66	Self-delta-pka	Nan	Nan
UNUPUP	1	1	noZ	noQ4	noWater	0	Neutral	0	1-Neutral	-24.66	Self-delta-pka	Nan	Nan
XELYAR	2	1	noZ	noQ4	noWater	1	Neutral	0	1-N_1-Solvate_	-24.66	Self-delta-pka	Nan	Nan
KORLOS	1	1	noZ	noQ4	noWater	0	Neutral	0	1-Neutral	-24.66	Self-delta-pka	Nan	Nan
APUCIY	1	1	noZ	noQ4	noWater	0	Neutral	0	1-Neutral	-24.65	Self-delta-pka	Nan	Nan
LOHQUW	1	1	noZ	noQ4	noWater	0	Neutral	0	1-Neutral	-24.65	Self-delta-pka	Nan	Nan
LUZZEN	1	1	noZ	noQ4	noWater	0	Neutral	0	1-Neutral	-24.65	Self-delta-pka	Nan	Nan
MAHXID	1	1	noZ	noQ4	noWater	0	Neutral	0	1-Neutral	-24.65	Self-delta-pka	Nan	Nan
NILWUA	1	1	noZ	noQ4	noWater	0	Neutral	0	1-Neutral	-24.65	Self-delta-pka	Nan	Nan
HIFQUJ	1	1	noZ	noQ4	noWater	0	Neutral	0	1-Neutral	-24.65	Self-delta-pka	-27.62	Self-delta-pka
IRESIH	1	1	noZ	noQ4	noWater	0	Neutral	0	1-Neutral	-24.65	Self-delta-pka	-27.44	Self-delta-pka
FERTOM	1	1	noZ	noQ4	noWater	0	Neutral	0	1-Neutral	-24.65	Self-delta-pka	Nan	Nan
KAJHIP	1	1	noZ	noQ4	noWater	0	Neutral	0	1-Neutral	-24.65	Self-delta-pka	Nan	Nan
TAWPOX	1	1	noZ	noQ4	noWater	0	Neutral	0	1-Neutral	-24.65	Self-delta-pka	Nan	Nan
YIMNUE	1	1	noZ	noQ4	noWater	0	Neutral	0	1-Neutral	-24.65	Self-delta-pka	Nan	Nan
AFIYIA	1	1	noZ	noQ4	noWater	0	Neutral	0	1-Neutral	-24.64	Self-delta-pka	Nan	Nan
DICWOD	1	1	noZ	noQ4	noWater	0	Neutral	0	1-Neutral	-24.64	Self-delta-pka	Nan	Nan
FEXZOX	1	1	noZ	noQ4	noWater	0	Neutral	0	1-Neutral	-24.64	Self-delta-pka	Nan	Nan
JIVZET	1	1	noZ	noQ4	noWater	0	Neutral	0	1-Neutral	-24.64	Self-delta-pka	Nan	Nan
NILXAH	1	1	noZ	noQ4	noWater	0	Neutral	0	1-Neutral	-24.64	Self-delta-pka	Nan	Nan
OSOJEM	1	1	noZ	noQ4	noWater	0	Neutral	0	1-Neutral	-24.64	Self-delta-pka	Nan	Nan
VOFTER	1	1	noZ	noQ4	noWater	0	Neutral	0	1-Neutral	-24.64	Self-delta-pka	Nan	Nan
SOBMUU	1	1	noZ	noQ4	noWater	0	Neutral	0	1-Neutral	-24.64	Self-delta-pka	Nan	Nan
FETNUQ	1	1	noZ	noQ4	noWater	0	Neutral	0	1-Neutral	-24.63	Self-delta-pka	-26.54	Self-delta-pka
ACCCYP	1	1	noZ	noQ4	noWater	0	Neutral	0	1-Neutral	-24.63	Self-delta-pka	-25.91	Self-delta-pka
ARUDOG	1	1	noZ	noQ4	noWater	0	Neutral	0	1-Neutral	-24.63	Self-delta-pka	Nan	Nan
EGABIY	1	1	noZ	noQ4	noWater	0	Neutral	0	1-Neutral	-24.63	Self-delta-pka	Nan	Nan
EGABOE	1	1	noZ	noQ4	noWater	0	Neutral	0	1-Neutral	-24.63	Self-delta-pka	Nan	Nan
EGABUK	1	1	noZ	noQ4	noWater	0	Neutral	0	1-Neutral	-24.63	Self-delta-pka	Nan	Nan
FAXZAF01	1	1	noZ	noQ4	noWater	0	Neutral	0	1-Neutral	-24.63	Self-delta-pka	Nan	Nan
GUGDAO	1	1	noZ	noQ4	noWater	0	Neutral	0	1-Neutral	-24.63	Self-delta-pka	Nan	Nan
PEJBUC	1	1	noZ	noQ4	noWater	0	Neutral	0	1-Neutral	-24.63	Self-delta-pka	Nan	Nan
PEJBUC01	1	1	noZ	noQ4	noWater	0	Neutral	0	1-Neutral	-24.63	Self-delta-pka	Nan	Nan
BAHLII	1	1	noZ	noQ4	noWater	0	Neutral	0	1-Neutral	-24.63	Self-delta-pka	Nan	Nan
BANTOA	1	1	noZ	noQ4	noWater	0	Neutral	0	1-Neutral	-24.63	Self-delta-pka	Nan	Nan
KUYBIQ	1	1	noZ	noQ4	noWater	0	Neutral	0	1-Neutral	-24.63	Self-delta-pka	Nan	Nan
OSOJOW	1	1	noZ	noQ4	noWater	0	Neutral	0	1-Neutral	-24.63	Self-delta-pka	Nan	Nan
EGACAR	2	1	noZ	noQ4	noWater	1	Neutral	0	1-N_1-Solvate_	-24.63	Self-delta-pka	Nan	Nan
BOWCOG	1	1	noZ	noQ4	noWater	0	Neutral	0	1-Neutral	-24.62	Self-delta-pka	Nan	Nan
CODDUV	1	1	noZ	noQ4	noWater	0	Neutral	0	1-Neutral	-24.62	Self-delta-pka	Nan	Nan
FAHYIW	1	1	noZ	noQ4	noWater	0	Neutral	0	1-Neutral	-24.62	Self-delta-pka	Nan	Nan
FAQGOV	1	1	noZ	noQ4	noWater	0	Neutral	0	1-Neutral	-24.62	Self-delta-pka	Nan	Nan
FOVJIJ	1	1	noZ	noQ4	noWater	0	Neutral	0	1-Neutral	-24.62	Self-delta-pka	Nan	Nan
KIWKOT	1	1	noZ	noQ4	noWater	0	Neutral	0	1-Neutral	-24.62	Self-delta-pka	Nan	Nan
OKALOD	1	1	noZ	noQ4	noWater	0	Neutral	0	1-Neutral	-24.62	Self-delta-pka	Nan	Nan
BONWOS	1	1	noZ	noQ4	noWater	0	Neutral	0	1-Neutral	-24.62	Self-delta-pka	-25.69	Self-delta-pka
IVOJEK	1	1	noZ	noQ4	noWater	0	Neutral	0	1-Neutral	-24.62	Self-delta-pka	Nan	Nan
JUMXEW	1	1	noZ	noQ4	noWater	0	Neutral	0	1-Neutral	-24.62	Self-delta-pka	Nan	Nan
KAWJAU	1	1	noZ	noQ4	noWater	0	Neutral	0	1-Neutral	-24.62	Self-delta-pka	Nan	Nan
KAWJAU01	1	1	noZ	noQ4	noWater	0	Neutral	0	1-Neutral	-24.62	Self-delta-pka	Nan	Nan
FABZAK	1	1	noZ	noQ4	noWater	0	Neutral	0	1-Neutral	-24.61	Self-delta-pka	-26.44	Self-delta-pka
BOYNOS	1	1	noZ	noQ4	noWater	0	Neutral	0	1-Neutral	-24.61	Self-delta-pka	Nan	Nan
BRAMNQ10	1	1	noZ	noQ4	noWater	0	Neutral	0	1-Neutral	-24.61	Self-delta-pka	Nan	Nan
CUFWEF	1	1	noZ	noQ4	noWater	0	Neutral	0	1-Neutral	-24.61	Self-delta-pka	Nan	Nan
DAJYAO	1	1	noZ	noQ4	noWater	0	Neutral	0	1-Neutral	-24.61	Self-delta-pka	Nan	Nan
DITYAG	1	1	noZ	noQ4	noWater	0	Neutral	0	1-Neutral	-24.61	Self-delta-pka	Nan	Nan
DITYEK10	1	1	noZ	noQ4	noWater	0	Neutral	0	1-Neutral	-24.61	Self-delta-pka	Nan	Nan
DUXTUL	1	1	noZ	noQ4	noWater	0	Neutral	0	1-Neutral	-24.61	Self-delta-pka	Nan	Nan
EGACUL	1	1	noZ	noQ4	noWater	0	Neutral	0	1-Neutral	-24.61	Self-delta-pka	Nan	Nan
GATRAU	1	1	noZ	noQ4	noWater	0	Neutral	0	1-Neutral	-24.61	Self-delta-pka	Nan	Nan
GAVMEY	1	1	noZ	noQ4	noWater	0	Neutral	0	1-Neutral	-24.61	Self-delta-pka	Nan	Nan
NECGUA	1	1	noZ	noQ4	noWater	0	Neutral	0	1-Neutral	-24.61	Self-delta-pka	Nan	Nan
NEQHUP	1	1	noZ	noQ4	noWater	0	Neutral	0	1-Neutral	-24.61	Self-delta-pka	Nan	Nan
REHBUE	1	1	noZ	noQ4	noWater	0	Neutral	0	1-Neutral	-24.61	Self-delta-pka	Nan	Nan
TUXCUK	1	1	noZ	noQ4	noWater	0	Neutral	0	1-Neutral	-24.61	Self-delta-pka	Nan	Nan
EPOWUD	1	1	noZ	noQ4	noWater	0	Neutral	0	1-Neutral	-24.6	Self-delta-pka	Nan	Nan
OKUVUN	1	1	noZ	noQ4	noWater	0	Neutral	0	1-Neutral	-24.6	Self-delta-pka	Nan	Nan
QEHKET	1	1	noZ	noQ4	noWater	0	Neutral	0	1-Neutral	-24.6	Self-delta-pka	Nan	Nan
SUXKIH	1	1	noZ	noQ4	noWater	0	Neutral	0	1-Neutral	-24.6	Self-delta-pka	Nan	Nan
VIWPUM	1	1	noZ	noQ4	noWater	0	Neutral	0	1-Neutral	-24.6	Self-delta-pka	Nan	Nan
BETDUZ	1	1	noZ	noQ4	noWater	0	Neutral	0	1-Neutral	-24.59	Self-delta-pka	Nan	Nan
BURNOT	1	1	noZ	noQ4	noWater	0	Neutral	0	1-Neutral	-24.59	Self-delta-pka	Nan	Nan
XEBYAH	1	1	noZ	noQ4	noWater	0	Neutral	0	1-Neutral	-24.59	Self-delta-pka	Nan	Nan
JABBOH	1	1	noZ	noQ4	noWater	0	Neutral	0	1-Neutral	-24.59	Self-delta-pka	Nan	Nan
OYASAK	1	1	noZ	noQ4	noWater	0	Neutral	0	1-Neutral	-24.59	Self-delta-pka	Nan	Nan
DOSCOE	1	1	noZ	noQ4	noWater	0	Neutral	0	1-Neutral	-24.58	Self-delta-pka	Nan	Nan
EACLUP	1	1	noZ	noQ4	noWater	0	Neutral	0	1-Neutral	-24.58	Self-delta-pka	Nan	Nan
DORCET	1	1	noZ	noQ4	noWater	0	Neutral	0	1-Neutral	-24.58	Self-delta-pka	Nan	Nan
LAFSAO	1	1	noZ	noQ4	noWater	0	Neutral	0	1-Neutral	-24.58	Self-delta-pka	Nan	Nan
OTIJIM	1	1	noZ	noQ4	noWater	0	Neutral	0	1-Neutral	-24.58	Self-delta-pka	Nan	Nan
RADYIE	1	1	noZ	noQ4	noWater	0	Neutral	0	1-Neutral	-24.58	Self-delta-pka	Nan	Nan
RENMEF	1	1	noZ	noQ4	noWater	0	Neutral	0	1-Neutral	-24.58	Self-delta-pka	Nan	Nan
TIMQAK	1	1	noZ	noQ4	noWater	0	Neutral	0	1-Neutral	-24.58	Self-delta-pka	Nan	Nan
ULADIW	1	1	noZ	noQ4	noWater	0	Neutral	0	1-Neutral	-24.58	Self-delta-pka	Nan	Nan
WIKTEQ	1	1	noZ	noQ4	noWater	0	Neutral	0	1-Neutral	-24.58	Self-delta-pka	Nan	Nan
ZZZPVS02	1	1	noZ	noQ4	noWater	0	Neutral	0	1-Neutral	-24.58	Self-delta-pka	Nan	Nan
ZZZPVT	1	1	noZ	noQ4	noWater	0	Neutral	0	1-Neutral	-24.58	Self-delta-pka	Nan	Nan
XANJAX	1	1	noZ	noQ4	noWater	0	Neutral	0	1-Neutral	-24.58	Self-delta-pka	Nan	Nan
ASEGOW	1	1	Zwit	Q4	noWater	0	Neutral	0	1-NeutralZQ4	-24.58	Self-delta-pka	Nan	Nan
AHUFAK	1	1	noZ	noQ4	noWater	0	Neutral	0	1-Neutral	-24.57	Self-delta-pka	Nan	Nan
APOVOR	1	1	noZ	noQ4	noWater	0	Neutral	0	1-Neutral	-24.57	Self-delta-pka	Nan	Nan
COMQUS	1	1	noZ	noQ4	noWater	0	Neutral	0	1-Neutral	-24.57	Self-delta-pka	Nan	Nan
DUKVUA	1	1	noZ	noQ4	noWater	0	Neutral	0	1-Neutral	-24.57	Self-delta-pka	Nan	Nan
GUCNID	1	1	noZ	noQ4	noWater	0	Neutral	0	1-Neutral	-24.57	Self-delta-pka	Nan	Nan
IDIDIJ	1	1	noZ	noQ4	noWater	0	Neutral	0	1-Neutral	-24.57	Self-delta-pka	Nan	Nan
NEVQAG	1	1	noZ	noQ4	noWater	0	Neutral	0	1-Neutral	-24.57	Self-delta-pka	Nan	Nan
PABRUG	1	1	noZ	noQ4	noWater	0	Neutral	0	1-Neutral	-24.57	Self-delta-pka	Nan	Nan
SAMCAK	1	1	noZ	noQ4	noWater	0	Neutral	0	1-Neutral	-24.57	Self-delta-pka	Nan	Nan
XIDNOO	1	1	noZ	noQ4	noWater	0	Neutral	0	1-Neutral	-24.57	Self-delta-pka	Nan	Nan
WAXRIY	1	1	noZ	noQ4	noWater	0	Neutral	0	1-Neutral	-24.57	Self-delta-pka	Nan	Nan
ACOHUX	2	1	noZ	noQ4	Water	0	Neutral	0	1-N__Hydrate	-24.57	Self-delta-pka	Nan	Nan
CMIHIV	1	1	noZ	noQ4	noWater	0	Neutral	0	1-Neutral	-24.56	Self-delta-pka	-25.78	Self-delta-pka
XABCUC	1	1	noZ	noQ4	noWater	0	Neutral	0	1-Neutral	-24.56	Self-delta-pka	Nan	Nan
CUFWUV	1	1	noZ	noQ4	noWater	0	Neutral	0	1-Neutral	-24.56	Self-delta-pka	Nan	Nan
[truncated: 256,720+ more rows]
